# Supplementary material for: Palladium-catalyzed coupling of amides and cyclopropanols for the synthesis of γ-diketones
Source: Royal Society of Chemistry journal article supplement (doi:10.1039/d3cc02888g), 2023-01-01

Supporting Information for

**Palladium-Catalyzed Coupling of Amides and Cyclopropanols  
for the Synthesis of  $\gamma$ -Diketones**

Lili Fang, Shuqi Jia, Shuaixin Fan, and Jin Zhu\*

School of Chemistry and Chemical Engineering, State Key Laboratory of Coordination Chemistry,  
Nanjing University, Nanjing 210023, China.

\*Corresponding Author. E-mail: [jinz@nju.edu.cn](mailto:jinz@nju.edu.cn).

## Content

|                                                                                        |    |
|----------------------------------------------------------------------------------------|----|
| General Information .....                                                              | 3  |
| Optimization of the Reaction Conditions.....                                           | 3  |
| Optimization of the Reaction Conditions for <i>N</i> -acyl phthalimides.....           | 3  |
| Optimization of the Reaction Conditions for <i>N</i> -glutarimide benzamides.....      | 5  |
| Optimization of the Reaction Conditions for certain <i>N</i> -glutarimide amides ..... | 6  |
| Typical Procedure for the Synthesis of $\gamma$ -Diketones .....                       | 8  |
| Characterization data of <i>N</i> -glutarimide amide .....                             | 9  |
| Characterization data of cyclopropanols .....                                          | 9  |
| Characterization data of $\gamma$ -diketones .....                                     | 10 |
| Mechanistic Studies .....                                                              | 21 |
| Coupling of cyclopropanol and amide in the presence of BHT .....                       | 21 |
| Radical clock experiment.....                                                          | 22 |
| NMR spectrum evidence for the release of glutarimide. ....                             | 22 |
| Competition experiment.....                                                            | 24 |
| Control experiments .....                                                              | 24 |
| Proposed mechanism.....                                                                | 26 |
| Exploration for the cross-coupling reaction of acid chloride with cyclopropanol.....   | 26 |
| Kinetic competition experiment .....                                                   | 28 |
| Reactivity order chemistry set.....                                                    | 29 |
| Reduction of $\gamma$ -diketones to alkane .....                                       | 29 |
| Reference.....                                                                         | 31 |
| NMR spectra .....                                                                      | 32 |

## General Information

All reactions were performed in a nitrogen-filled dry box unless otherwise stated. All solvents were obtained from commercial suppliers and were used as received. Toluene (PhMe) were purchased as HPLC-grade from Guoyao. Other commercially available reagents were used without further purification. Reaction temperature was reported corresponding to the oil bath temperature. Analytical thin-layer chromatography (TLC) was performed on Merck 60 F254 silica gel plates. Flash chromatography was performed using 40-63  $\mu\text{m}$  silica gel (Si 60, Merck).  $^1\text{H}$  and  $^{13}\text{C}$  NMR spectra were recorded on Bruker 500 or 400 (stated especially) MHz NMR spectrometer in the solvents indicated. Chemical shifts ( $\delta$ ) are given in ppm relative to TMS. HRMS were obtained on a Thermo Fisher Scientific LTQ FT Ultra.

Tertiary cyclopropanols were prepared by Kulinkovich reaction or Simmons-Smith sequence according to the reported procedure.<sup>1</sup> The substrates of amide were prepared according to the reported literature procedures.<sup>2</sup> All the characteristic data are consistent with the data reported before.<sup>3-10</sup>

The amount of ligand  $\text{PCy}_3$  is critical for the yield of  $\gamma$ -diketones, excessive ligand will reduce yields of  $\gamma$ -diketones. Otherwise, addition of 1.0 equiv amount of  $\text{B}(\text{OH})_3$  can promote the yield of  $\gamma$ -diketones derived from the reaction of **1a** and **2d**, but it seems ineffective for the other reactions sometime.

Additive distortion parameters ( $\Sigma\tau + \chi_{\text{N}}$ ) refer to the literature reported before.<sup>11</sup>

## Optimization of the Reaction Conditions

### Optimization of the Reaction Conditions for *N*-acyl phthalimides

Table S1. Screening of solvent and ligand in the presence of  $\text{Pd}(\text{OAc})_2$

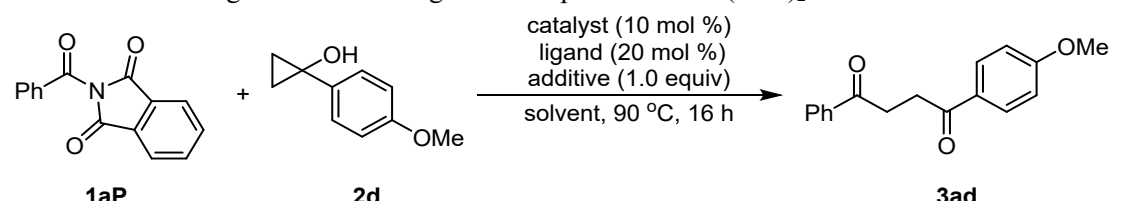

The reaction scheme shows the reaction of **1aP** (N-acyl phthalimide) and **2d** (cyclopropanol) to form **3ad** ( $\gamma$ -diketone). The reaction conditions are: catalyst (10 mol %), ligand (20 mol %), additive (1.0 equiv), solvent, 90 °C, 16 h.

| Entry | catalyst                  | ligand                    | additive (1.0 equiv.)   | solvent     | Yield <sup>[a]</sup> |
|-------|---------------------------|---------------------------|-------------------------|-------------|----------------------|
| 1     | $\text{Pd}(\text{OAc})_2$ | $\text{PCy}_3$            | $\text{K}_2\text{CO}_3$ | 1,4-Dioxane | Trace                |
| 2     | $\text{Pd}(\text{OAc})_2$ | $\text{PCy}_3$            | $\text{K}_2\text{CO}_3$ | MeCN        | Trace                |
| 3     | $\text{Pd}(\text{OAc})_2$ | $\text{PCy}_3$            | $\text{K}_2\text{CO}_3$ | MeOH        | ND                   |
| 4     | $\text{Pd}(\text{OAc})_2$ | $\text{PCy}_3$            | $\text{K}_2\text{CO}_3$ | THF         | 25%                  |
| 5     | $\text{Pd}(\text{OAc})_2$ | $\text{PCy}_3$            | $\text{K}_2\text{CO}_3$ | PhMe        | 30%                  |
| 6     | $\text{Pd}(\text{OAc})_2$ | $\text{PPh}_3$ (10 mol %) | $\text{K}_2\text{CO}_3$ | PhMe        | ND                   |
| 7     | $\text{Pd}(\text{OAc})_2$ | Dppf (10 mol %)           | $\text{K}_2\text{CO}_3$ | PhMe        | ND                   |
| 8     | $\text{Pd}(\text{OAc})_2$ | IPr                       | $\text{K}_2\text{CO}_3$ | PhMe        | Trace                |
| 9     | $\text{Pd}(\text{OAc})_2$ | $\text{PCy}_3$            | $\text{Et}_3\text{N}$   | PhMe        | 28%                  |

**Table S2.** Screening of ligand and additive in the presence of Pd(OAc)<sub>2</sub>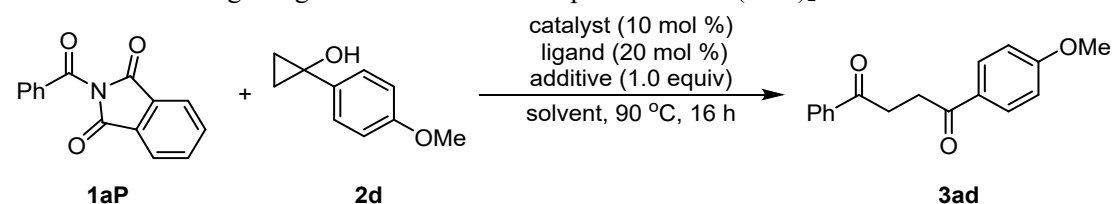

| Entry | catalyst             | ligand                         | additive                       | solvent | Yield <sup>[b]</sup> |
|-------|----------------------|--------------------------------|--------------------------------|---------|----------------------|
| 1     | Pd(OAc) <sub>2</sub> | PCy <sub>3</sub>               | Et <sub>3</sub> N              | PhMe    | 29%                  |
| 2     | Pd(OAc) <sub>2</sub> | P <sup>t</sup> Bu <sub>3</sub> | Et <sub>3</sub> N              | PhMe    | ND                   |
| 3     | Pd(OAc) <sub>2</sub> | Dppm                           | Et <sub>3</sub> N              | PhMe    | 17%                  |
| 4     | Pd(OAc) <sub>2</sub> | Dcype                          | Et <sub>3</sub> N              | PhMe    | Trace                |
| 5     | Pd(OAc) <sub>2</sub> | X-phos                         | Et <sub>3</sub> N              | PhMe    | messy                |
| 6     | Pd(OAc) <sub>2</sub> | Davephos                       | Et <sub>3</sub> N              | PhMe    | ND                   |
| 7     | Pd(OAc) <sub>2</sub> | 2,2'-Bipyridine                | Et <sub>3</sub> N              | PhMe    | ND                   |
| 8     | Pd(OAc) <sub>2</sub> | PCy <sub>3</sub>               | ---                            | PhMe    | 20%                  |
| 9     | Pd(OAc) <sub>2</sub> | PCy <sub>3</sub>               | KOAc                           | PhMe    | 23%                  |
| 10    | Pd(OAc) <sub>2</sub> | PCy <sub>3</sub>               | K <sub>3</sub> PO <sub>4</sub> | PhMe    | <20%                 |
| 11    | Pd(OAc) <sub>2</sub> | PCy <sub>3</sub>               | KO <sup>t</sup> Bu             | PhMe    | ND                   |
| 12    | Pd(OAc) <sub>2</sub> | PCy <sub>3</sub>               | DABCO                          | PhMe    | 40%                  |
| 13    | Pd(OAc) <sub>2</sub> | PCy <sub>3</sub>               | HOAc                           | PhMe    | <20%                 |
| 14    | Pd(OAc) <sub>2</sub> | PCy <sub>3</sub>               | B(OH) <sub>3</sub>             | PhMe    | ND                   |
| 15    | Pd(OAc) <sub>2</sub> | PCy <sub>3</sub>               | PhCOOH                         | PhMe    | ND                   |

**Table S3.** Screening of catalyst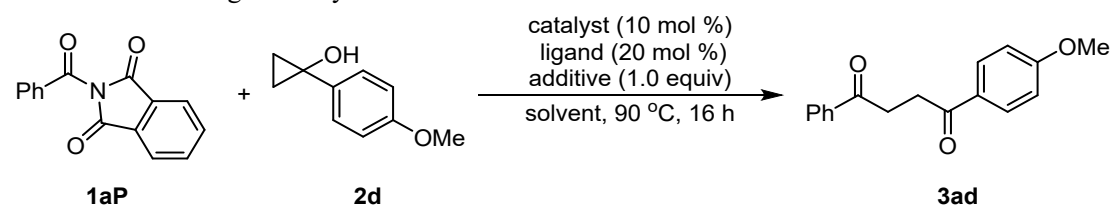

| Entry | catalyst                                       | ligand              | additive          | solvent | yield <sup>[a]</sup> |
|-------|------------------------------------------------|---------------------|-------------------|---------|----------------------|
| 1     | Pd(OAc) <sub>2</sub>                           | PCy <sub>3</sub>    | Et <sub>3</sub> N | PhMe    | 29%                  |
| 2     | Pd(OPiv) <sub>2</sub>                          | PCy <sub>3</sub>    | Et <sub>3</sub> N | PhMe    | 40%                  |
| 3     | Pd(CF <sub>3</sub> COO) <sub>2</sub>           | PCy <sub>3</sub>    | Et <sub>3</sub> N | PhMe    | ND                   |
| 4     | Pd(acac) <sub>2</sub>                          | PCy <sub>3</sub>    | DABCO             | PhMe    | 37%                  |
| 5     | Pd <sub>2</sub> (dba) <sub>3</sub> (5 mol %)   | PCy <sub>3</sub>    | Et <sub>3</sub> N | PhMe    | 17%                  |
| 6     | [Pd(allyl)Cl] <sub>2</sub> (5 mol %)           | PCy <sub>3</sub>    | Et <sub>3</sub> N | PhMe    | ND                   |
| 7     | Pd(PPh <sub>3</sub> )Cl <sub>2</sub> (5 mol %) | PCy <sub>3</sub>    | Et <sub>3</sub> N | PhMe    | ND                   |
| 8     | Pd(PPh <sub>3</sub> ) <sub>4</sub> (5 mol %)   | PCy <sub>3</sub>    | Et <sub>3</sub> N | PhMe    | ND                   |
| 9     | NiI <sub>2</sub>                               | 2,2'-Bipyridine     | Zn (2.0 equiv)    | DMF     | ND                   |
| 10    | NiI <sub>2</sub>                               | 2,2'-Bipyridine     | Zn (2.0 equiv)    | PhMe    | ND                   |
| 11    | NiBr <sub>2</sub> (dme)                        | 1,10-Phenanthroline | Zn (2.0 equiv)    | MeOH    | ND                   |
| 12    | Ni(cod) <sub>2</sub>                           | IPr                 | ---               | PhMe    | <30%                 |
| 13    | Ru <sub>3</sub> (CO) <sub>12</sub>             | Dppp                | ---               | PhMe    | ND                   |
| 14    | Ru <sub>3</sub> (CO) <sub>12</sub>             | PCy <sub>3</sub>    | ---               | PhMe    | ND                   |

|    |                       |                  |                   |      |                    |
|----|-----------------------|------------------|-------------------|------|--------------------|
| 15 | Pd(OPiv) <sub>2</sub> | PCy <sub>3</sub> | DABCO             | PhMe | 41%                |
| 16 | Pd(OPiv) <sub>2</sub> | PCy <sub>3</sub> | Et <sub>3</sub> N | PhMe | 62% <sup>[d]</sup> |

### Optimization of the Reaction Conditions for *N*-glutarimide benzamides

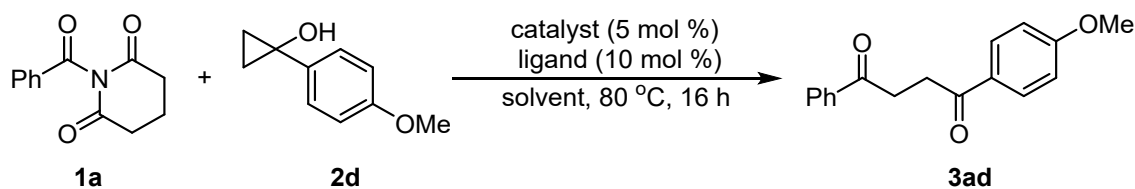

**Table S4.** Screening of solvent

| Entry | catalyst             | ligand           | solvent     | Yield <sup>[a]</sup> |
|-------|----------------------|------------------|-------------|----------------------|
| 1     | Pd(OAc) <sub>2</sub> | PCy <sub>3</sub> | PhMe        | 56%                  |
| 2     | Pd(OAc) <sub>2</sub> | PCy <sub>3</sub> | 1,4-dioxane | 52%                  |
| 3     | Pd(OAc) <sub>2</sub> | PCy <sub>3</sub> | THF         | 55%                  |
| 4     | Pd(OAc) <sub>2</sub> | PCy <sub>3</sub> | MeCN        | Trace                |
| 5     | Pd(OAc) <sub>2</sub> | PCy <sub>3</sub> | DMF         | ND                   |
| 6     | Pd(OAc) <sub>2</sub> | PCy <sub>3</sub> | DMSO        | ND                   |

**Table S5.** Screening of catalyst

| Entry | catalyst                           | ligand           | solvent | yield <sup>[a][b]</sup> |
|-------|------------------------------------|------------------|---------|-------------------------|
| 1     | Pd(OAc) <sub>2</sub>               | PCy <sub>3</sub> | PhMe    | 56%                     |
| 2     | Pd(OPiv) <sub>2</sub>              | PCy <sub>3</sub> | PhMe    | 58%                     |
| 3     | Pd(PPh <sub>3</sub> ) <sub>4</sub> | PCy <sub>3</sub> | PhMe    | 43%                     |
| 4     | Pd(acac) <sub>2</sub>              | PCy <sub>3</sub> | PhMe    | 60%                     |
| 5     | Pd <sub>2</sub> (dba) <sub>3</sub> | PCy <sub>3</sub> | PhMe    | 60%                     |
| 6     | PdCl <sub>2</sub>                  | PCy <sub>3</sub> | PhMe    | ND                      |
| 7     | Pd(acac) <sub>2</sub>              | PCy <sub>3</sub> | PhMe    | 68% <sup>[c]</sup>      |

**Table S6.** Screening of ligand

| Entry | catalyst              | ligand                         | solvent | yield <sup>[a][d]</sup> |
|-------|-----------------------|--------------------------------|---------|-------------------------|
| 1     | Pd(acac) <sub>2</sub> | PPh <sub>3</sub>               | PhMe    | 16%                     |
| 2     | Pd(acac) <sub>2</sub> | P <sup>t</sup> Bu <sub>3</sub> | PhMe    | ND                      |
| 3     | Pd(acac) <sub>2</sub> | X-phos                         | PhMe    | 12%                     |
| 4     | Pd(acac) <sub>2</sub> | Dcype                          | PhMe    | Trace                   |
| 5     | Pd(acac) <sub>2</sub> | Xantphos                       | PhMe    | 18%                     |
| 6     | Pd(acac) <sub>2</sub> | Dppf                           | PhMe    | 10%                     |
| 7     | Pd(acac) <sub>2</sub> | Dppm                           | PhMe    | ND                      |

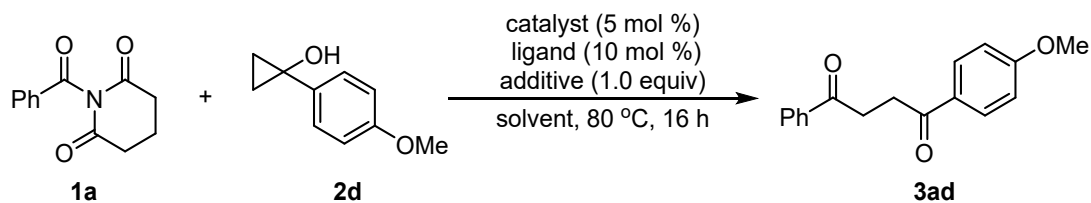

**Table S7.** Screening of Screening for additive

| Entry | catalyst              | ligand           | additive (1.0 equiv)           | solvent | Yield <sup>[b]/[d]</sup> |
|-------|-----------------------|------------------|--------------------------------|---------|--------------------------|
| 1     | Pd(acac) <sub>2</sub> | PCy <sub>3</sub> | B(OMe) <sub>3</sub>            | PhMe    | 55%                      |
| 2     | Pd(acac) <sub>2</sub> | PCy <sub>3</sub> | PhCOOH                         | PhMe    | 61%                      |
| 3     | Pd(acac) <sub>2</sub> | PCy <sub>3</sub> | HOAc                           | PhMe    | 67%                      |
| 4     | Pd(acac) <sub>2</sub> | PCy <sub>3</sub> | Zn(OTf) <sub>2</sub>           | PhMe    | ND                       |
| 5     | Pd(acac) <sub>2</sub> | PCy <sub>3</sub> | CuCl                           | PhMe    | ND                       |
| 6     | Pd(acac) <sub>2</sub> | PCy <sub>3</sub> | H <sub>3</sub> PO <sub>4</sub> | PhMe    | Trace                    |
| 7     | Pd(acac) <sub>2</sub> | PCy <sub>3</sub> | K <sub>2</sub> CO <sub>3</sub> | PhMe    | 17%                      |
| 8     | Pd(acac) <sub>2</sub> | PCy <sub>3</sub> | NaO <sup>t</sup> Bu            | PhMe    | ND                       |
| 9     | Pd(acac) <sub>2</sub> | PCy <sub>3</sub> | Et <sub>3</sub> N              | PhMe    | 33%                      |

### Optimization of the Reaction Conditions for certain *N*-glutarimide amides

**Table S8.** Optimization of the Reaction Conditions for the coupling of **1j** and **2d**

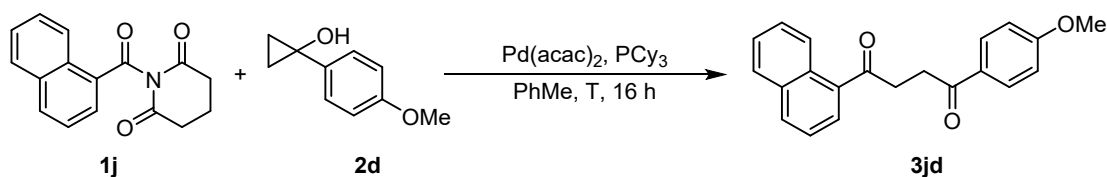

| Entry | Pd(acac) <sub>2</sub> | PCy <sub>3</sub> | T      | Yield <sup>[b]</sup> |
|-------|-----------------------|------------------|--------|----------------------|
| 1     | 5 mol %               | 10 mol %         | 80 °C  | 48%                  |
| 2     | 10 mol %              | 20 mol %         | 80 °C  | 62%                  |
| 3     | 5 mol %               | 10 mol %         | 100 °C | 56%                  |
| 4     | 10 mol %              | 20 mol %         | 100 °C | 57%                  |

**Table S9.** Optimization of the Reaction Conditions for the coupling of **1n** and **2d**

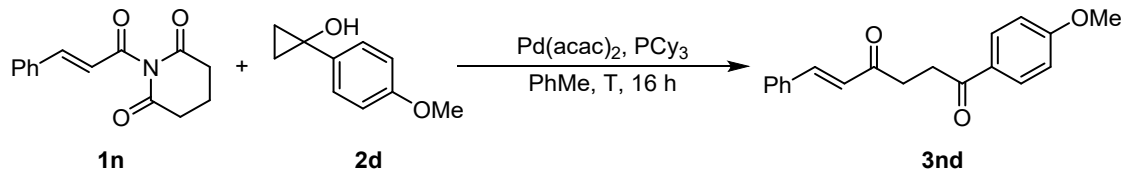

| Entry | Pd(acac) <sub>2</sub> | PCy <sub>3</sub> | T      | Yield <sup>[b]</sup> |
|-------|-----------------------|------------------|--------|----------------------|
| 1     | 5 mol %               | 10 mol %         | 80 °C  | 30%                  |
| 2     | 5 mol %               | 10 mol %         | 100 °C | 40%                  |
| 3     | 10 mol %              | 20 mol %         | 100 °C | 35%                  |

**Table S10.** Optimization of the Reaction Conditions for the coupling of **1o** and **2d**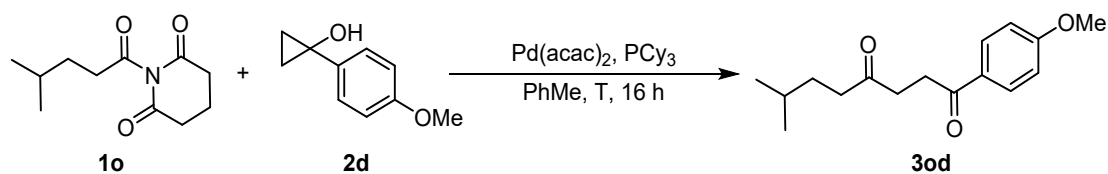

| Entry | Pd(acac) <sub>2</sub> | PCy <sub>3</sub> | T      | Yield <sup>[a]</sup> |
|-------|-----------------------|------------------|--------|----------------------|
| 1     | 10 mol %              | 20 mol %         | 100 °C | 56%                  |

**Table S11.** Optimization of the Reaction Conditions for the coupling of **1q** and **2d**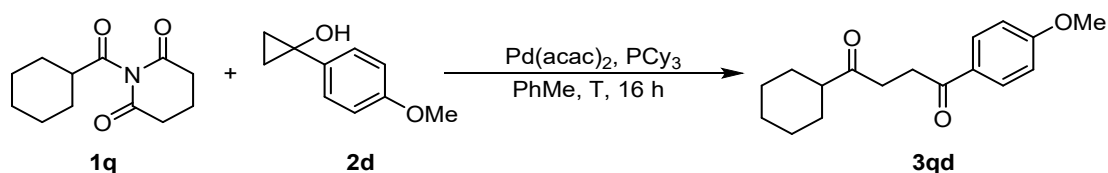

| Entry | Pd(acac) <sub>2</sub> | PCy <sub>3</sub> | T      | Yield <sup>[a]</sup> |
|-------|-----------------------|------------------|--------|----------------------|
| 1     | 5 mol %               | 10 mol %         | 80 °C  | <30%                 |
| 2     | 10 mol %              | 20 mol %         | 80 °C  | 53%                  |
| 3     | 5 mol %               | 10 mol %         | 100 °C | 39%                  |
| 4     | 10 mol %              | 20 mol %         | 100 °C | 66%                  |

**Scheme S1.** *N*-substitutes evaluation of benzamides<sup>[a][c]</sup>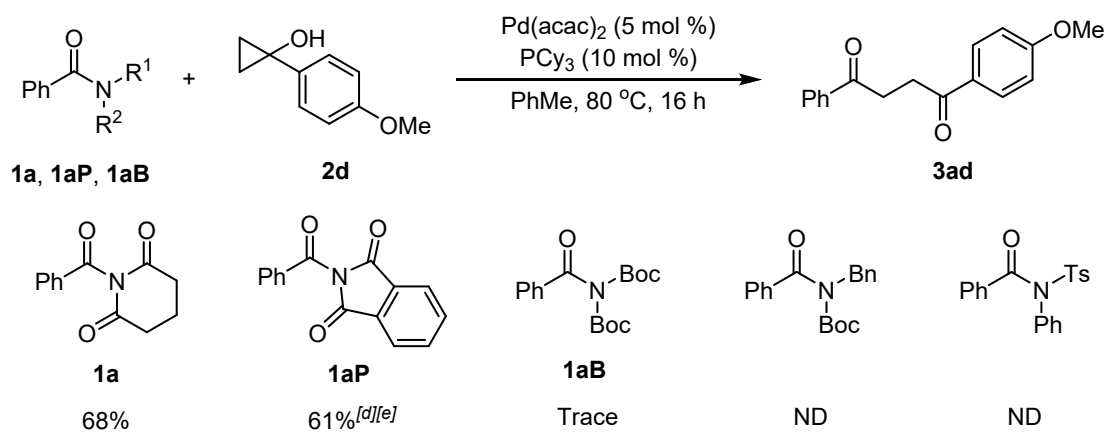

All reactions were performed on 0.2 mmol scale benzamide with 1.0 equiv of the cyclopropanol under N<sub>2</sub> unless stated in 2 mL toluene;

<sup>[a]</sup>isolated yields;

<sup>[b]</sup>yields determined by <sup>1</sup>H NMR with 1,3,5-trimethoxybenzene as the internal standard.

<sup>[c]</sup>1.25 equiv cyclopropanol was used;

<sup>[d]</sup>1.5 equiv cyclopropanol was used;

<sup>[e]</sup>Pd(OPiv)<sub>2</sub> (10 mol %), PCy<sub>3</sub> (20 mol %), Et<sub>3</sub>N (1.0 equiv) at 90 °C.

**Scheme S2.** Substrate scope of *N*-glutarimide amide with **2a** as coupling partner

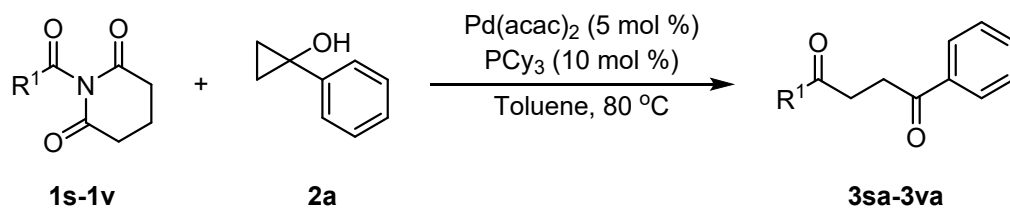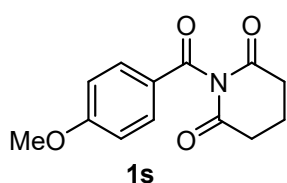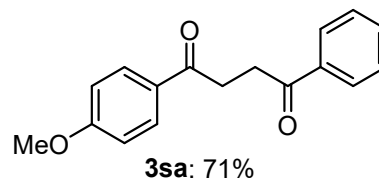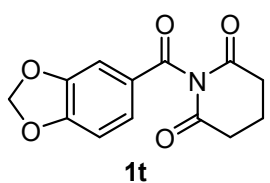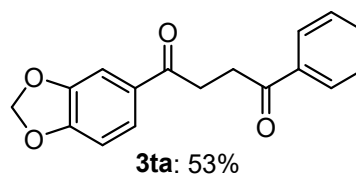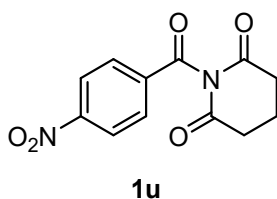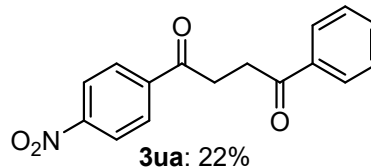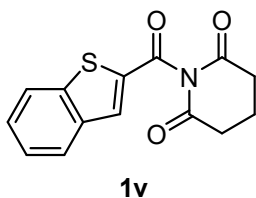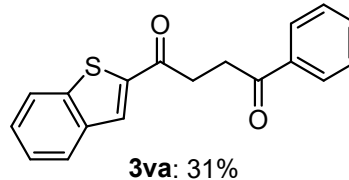

All reactions were performed on 0.2 mmol scale benzamide with 1.25 equiv of the cyclopropanol under  $\text{N}_2$  unless stated in 2 mL toluene;

### Typical Procedure for the Synthesis of $\gamma$ -Diketones

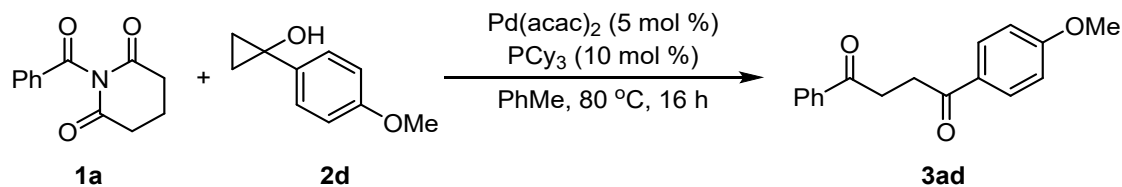

**General procedure:** A 10 mL oven-dried reaction vessel equipped with a magnetic stir bar was charged with **1a** (0.2 mmol, 1.0 equiv, 43.4 mg), **2d** (0.25 mmol, 1.25 equiv, 41 mg),  $\text{Pd(acac)}_2$  (0.01 mol, 0.05 equiv, 3.1 mg). The vessel was capped with a rubber septum and then transferred to the glove.  $\text{PCy}_3$  (10 mol %, 0.02 mmol, 5.6 mg) then was added and removed from glove. The reaction



mixture was resolved in PhMe (2 mL) and allowed to stir at 80 °C for 16 h. The reaction was cooled to room temperature then mixture was filtered on celite and concentrated to yield the crude product, which was further purified by flash chromatography (Petroleum ether/EtOAc = 5:1 or Petroleum ether/ Dichloromethane = 1:2) to give the desired product **3ad**.

### Characterization data of *N*-glutarimide amide

#### 5-(5-(2,6-Dioxopiperidine-1-carbonyl)thiazol-2-yl)-2-isobutoxybenzonitrile (**1m**)

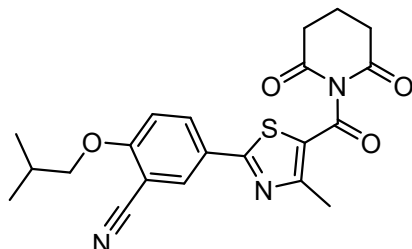

This compound was prepared according to the general procedure. Purification by column chromatography on silica gel (Petroleum ether/ Ethyl acetate = 1/1, v/v) afforded **3qd** as a yellow solid (29 mg). <sup>1</sup>H NMR (500 MHz, Chloroform-*d*) δ 8.13 (d, *J* = 2.0 Hz, 1H), 8.11 (dd, *J* = 9.0, 2.5 Hz, 1H), 7.01 (d, *J* = 9.0 Hz, 1H), 3.90 (d, *J* = 6.5 Hz, 2H), 2.81 (s, 3H), 2.76 (t, *J* = 6.5 Hz, 4H), 2.20 (hept, *J* = 6.5 Hz, 1H), 2.13 (p, *J* = 6.5 Hz, 2H), 1.09 (d, *J* = 7.0 Hz, 6H). <sup>13</sup>C NMR (126 MHz, Chloroform-*d*) δ 171.39, 169.15, 164.90, 163.01, 162.65, 132.84, 132.45, 126.26, 125.26, 115.13, 112.70, 103.11, 75.77, 32.38, 28.12, 19.01, 18.21, 17.29.

HRMS (ESI) *m/z* calcd. for C<sub>21</sub>H<sub>21</sub>N<sub>3</sub>O<sub>4</sub>S [M-H]<sup>-</sup> 410.1180, found 410.1176.

#### 1-(4-Methylpentanoyl)piperidine-2,6-dione (**1o**)

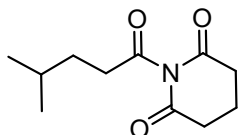

White solid. <sup>1</sup>H NMR (500 MHz, Chloroform-*d*) δ 2.73 – 2.59 (m, 6H), 2.01 (h, *J* = 6.4 Hz, 2H), 1.60 (qd, *J* = 7.4, 6.4, 2.3 Hz, 3H), 0.90 (t, *J* = 5.8 Hz, 6H). <sup>13</sup>C NMR (126 MHz, Chloroform-*d*) δ 178.36, 171.56, 171.52, 39.09, 39.07, 32.24, 32.22, 32.03, 27.22, 22.20, 17.29.

HRMS (FI) *m/z* calcd. for C<sub>11</sub>H<sub>17</sub>NO<sub>3</sub> [M]<sup>+</sup> 211.1203, found 211.1197.

### Characterization data of cyclopropanols

#### 1-(4-cyclohexylphenyl)cyclopropan-1-ol (**2c**)

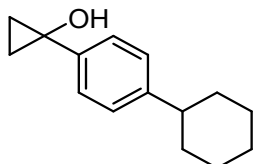

White solid. <sup>1</sup>H NMR (500 MHz, Chloroform-*d*) δ 7.26 – 7.23 (m, 2H), 7.20 – 7.17 (m, 2H), 2.52 – 2.45 (m, 1H), 2.01 (br, 1H), 1.91 – 1.81 (m, 4H), 1.78 – 1.71 (m, 1H), 1.47 – 1.33 (m, 4H), 1.31 – 1.25 (m, 1H), 1.24 – 1.22 (m, 2H), 1.04 – 1.00 (m, 2H). <sup>13</sup>C NMR (126 MHz, Chloroform-*d*) δ 146.47, 141.51, 126.83, 124.60, 56.70, 44.17, 34.49, 26.91, 26.16, 17.45.

HRMS (FI) *m/z* calcd. for C<sub>15</sub>H<sub>20</sub>O [M]<sup>+</sup> 216.1509, found 216.1511.

### 1-(4-Nitrophenyl)cyclopropan-1-ol (2i)

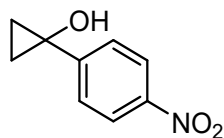

Yellow solid.  $^1\text{H}$  NMR (500 MHz, Chloroform-*d*)  $\delta$  8.17 – 8.13 (m, 2H), 7.40 – 7.36 (m, 2H), 2.69 (br, 1H), 1.47 – 1.42 (m, 2H), 1.20 – 1.15 (m, 2H).  $^{13}\text{C}$  NMR (126 MHz, Chloroform-*d*)  $\delta$  152.87, 146.16, 124.26, 123.55, 56.12, 20.28.

HRMS (FI)  $m/z$  calcd. for  $\text{C}_9\text{H}_{10}\text{O}_3\text{N}$   $[\text{M}]^+$  180.0654, found 180.0655.

### Characterization data of $\gamma$ -diketones

#### 1-(4-Methoxyphenyl)-4-phenylbutane-1,4-dione (3ad/3sa)

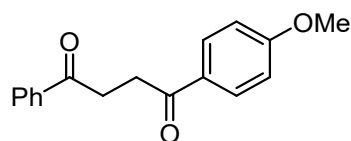

White solid (36.7 mg, 68%).  $^1\text{H}$  NMR (500 MHz, Chloroform-*d*)  $\delta$  8.06 – 8.00 (m, 4H), 7.60 – 7.55 (m, 1H), 7.50 – 7.45 (m, 2H), 6.98 – 6.93 (m, 2H), 3.87 (s, 3H), 3.47 – 3.39 (m, 4H).  $^{13}\text{C}$  NMR (126 MHz, Chloroform-*d*)  $\delta$  198.85, 197.15, 163.50, 136.81, 133.07, 130.35, 129.86, 128.55, 128.10, 113.70, 55.45, 32.65, 32.21.

The spectroscopic data matched literature values.<sup>12</sup>

#### 1-(4-Methoxyphenyl)-4-(*p*-tolyl)butane-1,4-dione (3bd)

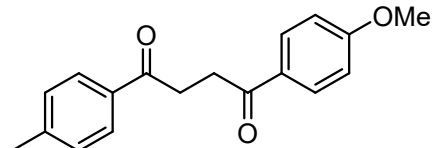

White solid (31.2 mg, 62%).  $^1\text{H}$  NMR (500 MHz, Chloroform-*d*)  $\delta$  8.03 – 7.99 (m, 2H), 7.95 – 7.91 (m, 2H), 7.29 – 7.24 (m, 2H), 6.96 – 6.92 (m, 2H), 3.86 (s, 3H), 3.44 – 3.36 (m, 4H), 2.41 (s, 3H).  $^{13}\text{C}$  NMR (126 MHz, Chloroform-*d*)  $\delta$  198.45, 197.25, 163.45, 143.80, 134.30, 130.32, 129.87, 129.22, 129.20, 128.18, 113.66, 55.41, 32.51, 32.21, 21.59.

The spectroscopic data matched literature values.<sup>13</sup>

#### 1-(4-(*tert*-Butyl)phenyl)-4-(4-methoxyphenyl)butane-1,4-dione (3cd)

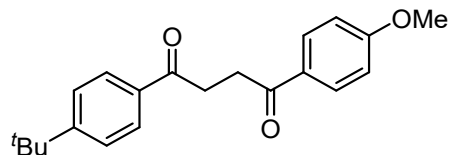

White solid (35.7 mg, 68%).  $^1\text{H}$  NMR (500 MHz, Chloroform-*d*)  $\delta$  8.03 – 7.99 (m, 2H), 7.99 – 7.95 (m, 2H), 7.48 (dt,  $J$  = 8.0, 2.0 Hz, 2H), 6.96 – 6.92 (m, 2H), 3.86 (s, 3H), 3.44 – 3.38 (m, 4H), 1.34 (s, 9H).  $^{13}\text{C}$  NMR (126 MHz, Chloroform-*d*)  $\delta$  198.47, 197.21, 163.43, 156.72, 134.21, 130.30, 129.86, 128.02, 125.45, 113.65, 55.39, 35.04, 32.50, 32.23, 31.03.

HRMS (FI)  $m/z$  calcd. for  $\text{C}_{21}\text{H}_{24}\text{O}_3$   $[\text{M}]^+$  324.1720, found 324.1712.

#### 1-(4-Fluorophenyl)-4-(4-methoxyphenyl)butane-1,4-dione (3dd)

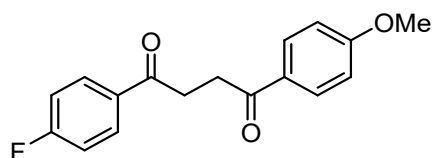

White solid (44.4 mg, 78%).  $^1\text{H NMR}$  (500 MHz, Chloroform-*d*)  $\delta$  8.07 – 8.02 (m, 2H), 8.02 – 7.97 (m, 2H), 7.15 – 7.10 (m, 2H), 6.95 – 6.91 (m, 2H), 3.85 (s, 3H), 3.40–3.37 (m, 4H).  $^{13}\text{C NMR}$  (126 MHz, Chloroform-*d*)  $\delta$  197.22, 196.99, 166.70, 164.67, 163.50, 133.24, 133.21, 130.71, 130.64, 130.30, 129.73, 115.67, 115.49, 113.68, 55.40, 32.45, 32.14.  $^{19}\text{F NMR}$  (471 MHz, Chloroform-*d*)  $\delta$  -105.36.

The spectroscopic data matched literature values.<sup>14</sup>

#### 1-(4-Chlorophenyl)-4-(4-methoxyphenyl)butane-1,4-dione (3ed)

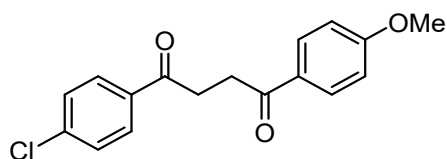

White solid (28.8 mg, 53%).  $^1\text{H NMR}$  (500 MHz, Chloroform-*d*)  $\delta$  8.04 – 7.95 (m, 4H), 7.48 – 7.43 (m, 2H), 6.98 – 6.93 (m, 2H), 3.88 (s, 3H), 3.44 – 3.37 (m, 4H).  $^{13}\text{C NMR}$  (126 MHz, Chloroform-*d*)  $\delta$  197.69, 196.97, 163.58, 139.51, 135.16, 130.37, 129.76, 129.54, 128.89, 113.74, 55.47, 32.58, 32.19.

The spectroscopic data matched literature values.<sup>14</sup>

#### 1-(4-Methoxyphenyl)-4-(*o*-tolyl)butane-1,4-dione (3fd)

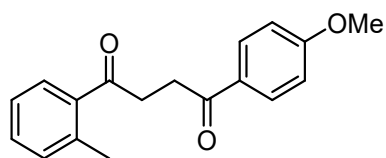

White solid (33.5 mg, 59%).  $^1\text{H NMR}$  (500 MHz, Chloroform-*d*)  $\delta$  8.02 – 7.98 (m, 2H), 7.80 (dd,  $J$  = 8.0, 1.5 Hz, 1H), 7.37 (td,  $J$  = 7.5, 1.5 Hz, 1H), 7.30 – 7.22 (m, 2H), 6.95 – 6.92 (m, 2H), 3.86 (s, 3H), 3.41 – 3.37 (m, 2H), 3.34 – 3.30 (m, 2H), 2.50 (s, 3H).  $^{13}\text{C NMR}$  (126 MHz, Chloroform-*d*)  $\delta$  202.81, 197.05, 163.44, 137.95, 137.88, 131.79, 131.18, 130.28, 129.82, 128.53, 125.63, 113.65, 55.40, 35.34, 32.43, 21.19.

The spectroscopic data matched literature values.<sup>15</sup>

#### 1-(2-Fluorophenyl)-4-(4-methoxyphenyl)butane-1,4-dione (3gd)

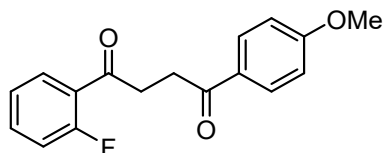

White solid (20.1 mg, 35%).  $^1\text{H NMR}$  (500 MHz, Chloroform-*d*)  $\delta$  8.03 – 7.98 (m, 2H), 7.89 (td,  $J$  = 7.5, 2.0 Hz, 1H), 7.54–7.49 (m, 1H), 7.22 (td,  $J$  = 7.5, 1.0 Hz, 1H), 7.15 (ddd,  $J$  = 11.0, 8.0, 1.0 Hz, 1H), 6.96 – 6.92 (m, 2H), 3.87 (s, 3H), 3.45–3.37 (m, 4H).  $^{13}\text{C NMR}$  (126 MHz, Chloroform-*d*)  $\delta$  197.16, 197.12, 196.94, 163.46, 163.06, 161.04, 134.51, 134.43, 130.65, 130.63, 130.32, 129.85, 124.37, 124.35, 116.74, 116.55, 113.67, 55.43, 37.47, 37.40, 32.19, 32.17.  $^{19}\text{F NMR}$  (471 MHz, Chloroform-*d*)  $\delta$  -109.01.

HRMS (FI)  $m/z$  calcd. for  $\text{C}_{17}\text{H}_{15}\text{O}_3\text{F}$   $[\text{M}]^+$  286.1000, found 286.0985.

### 1-(4-Methoxyphenyl)-4-(*m*-tolyl)butane-1,4-dione (3hd)

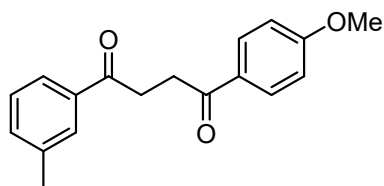

White solid (40.5 mg, 72%).  $^1\text{H}$  NMR (500 MHz, Chloroform-*d*)  $\delta$  8.03 – 7.99 (m, 2H), 7.85 – 7.80 (m, 2H), 7.39 – 7.32 (m, 2H), 6.96 – 6.91 (m, 2H), 3.86 (s, 3H), 3.44 – 3.37 (m, 4H), 2.40 (s, 3H).  $^{13}\text{C}$  NMR (126 MHz, Chloroform-*d*)  $\delta$  199.00, 197.17, 163.44, 138.25, 136.79, 133.77, 130.30, 129.83, 128.58, 128.38, 125.25, 113.64, 55.39, 32.65, 32.20, 21.28. The spectroscopic data matched literature values.<sup>16</sup>

### 1-(3-Chlorophenyl)-4-(4-methoxyphenyl)butane-1,4-dione (3id)

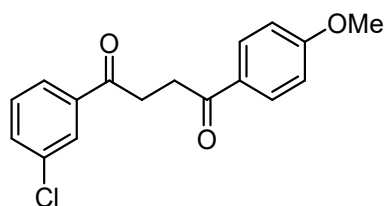

White solid (25.3 mg, 42%).  $^1\text{H}$  NMR (500 MHz, Chloroform-*d*)  $\delta$  8.03 – 7.98 (m, 3H), 7.91 (dt,  $J$  = 8.0, 1.5 Hz, 1H), 7.54 (ddd,  $J$  = 8.0, 2.5, 1.0 Hz, 1H), 7.42 (t,  $J$  = 8.0 Hz, 1H), 6.97 – 6.92 (m, 2H), 3.87 (s, 3H), 3.44 – 3.37 (m, 4H).  $^{13}\text{C}$  NMR (126 MHz, Chloroform-*d*)  $\delta$  197.62, 196.83, 163.56, 134.89, 132.97, 130.34, 129.90, 129.71, 128.23, 126.19, 113.72, 55.45, 32.69, 32.16. The spectroscopic data matched literature values.<sup>14</sup>

### 1-(4-Methoxyphenyl)-4-(naphthalen-1-yl)butane-1,4-dione (3jd)

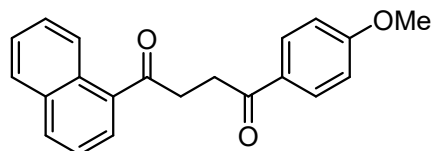

White solid (39.2 mg, 62%).  $^1\text{H}$  NMR (500 MHz, Chloroform-*d*)  $\delta$  8.61 (dd,  $J$  = 8.5, 1.0 Hz, 1H), 8.07 – 8.02 (m, 3H), 7.99 (dt,  $J$  = 8.5, 1.0 Hz, 1H), 7.89 – 7.86 (m, 1H), 7.60 – 7.56 (m, 1H), 7.55 – 7.50 (m, 2H), 6.98 – 6.94 (m, 2H), 3.87 (s, 3H), 3.49 (s, 4H).  $^{13}\text{C}$  NMR (126 MHz, Chloroform-*d*)  $\delta$  203.03, 197.05, 163.48, 136.02, 133.87, 132.45, 130.33, 130.07, 129.83, 128.29, 127.76, 127.55, 126.32, 125.81, 124.39, 113.69, 55.42, 36.02, 32.63. The spectroscopic data matched literature values.<sup>17</sup>

### 1-(Furan-2-yl)-4-(4-methoxyphenyl)butane-1,4-dione (3kd)

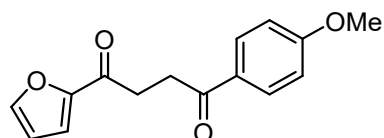

White solid (34.5 mg, 67%).  $^1\text{H}$  NMR (500 MHz, Chloroform-*d*)  $\delta$  8.00 – 7.96 (m, 2H), 7.58 (dd,  $J$  = 1.5, 0.5 Hz, 1H), 7.24 (dd,  $J$  = 3.5, 1.0 Hz, 1H), 6.94 – 6.90 (m, 2H), 6.53 (dd,  $J$  = 3.5, 2.0 Hz, 1H), 3.85 (s, 3H), 3.40 – 3.36 (m, 2H), 3.29 – 3.25 (m, 2H).  $^{13}\text{C}$  NMR (126 MHz, Chloroform-*d*)  $\delta$  196.78, 187.98, 163.48, 152.50, 146.27, 130.29, 129.67, 117.04, 113.66, 112.13, 55.40, 32.26, 31.86.

The spectroscopic data matched literature values.<sup>14</sup>

### 1-(4-Methoxyphenyl)-4-(thiophen-2-yl)butane-1,4-dione (3ld)

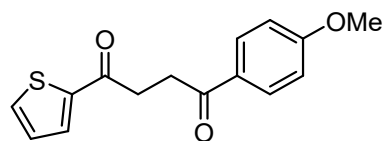

White solid (39 mg, 71%). <sup>1</sup>H NMR (500 MHz, Chloroform-*d*) δ 8.02 – 7.97 (m, 2H), 7.82 (dd, *J* = 4.0, 1.0 Hz, 1H), 7.63 (dd, *J* = 5.0, 1.5 Hz, 1H), 7.14 (dd, *J* = 5.0, 3.5 Hz, 1H), 6.96 – 6.91 (m, 2H), 3.86 (s, 3H), 3.42 – 3.35 (m, 4H). <sup>13</sup>C NMR (126 MHz, Chloroform-*d*) δ 196.90, 191.78, 163.52, 143.91, 133.45, 131.98, 130.37, 130.33, 129.71, 128.07, 113.69, 55.43, 33.23, 32.22.

The spectroscopic data matched literature values.<sup>18</sup>

### 2-Isobutoxy-5-(5-(4-(4-methoxyphenyl)-4-oxobutanoyl)-4-methylthiazol-2-yl)benzonitrile (3md)

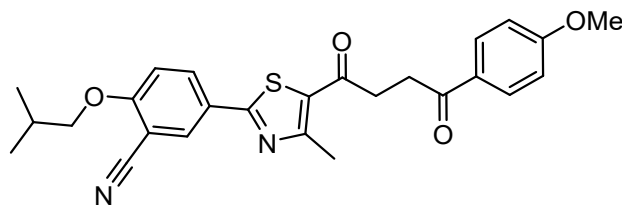

Light yellow solid (27 mg, 29%) <sup>1</sup>H NMR (500 MHz, Chloroform-*d*) δ 8.21 (d, *J* = 2.5 Hz, 1H), 8.11 (dd, *J* = 9.0, 2.5 Hz, 1H), 8.02 – 7.98 (m, 2H), 7.02 (d, *J* = 7.5 Hz, 1H), 6.97 – 6.93 (m, 2H), 3.90 (d, *J* = 6.5 Hz, 2H), 3.87 (s, 3H), 3.43 – 3.39 (m, 2H), 3.30 – 3.26 (m, 2H), 2.78 (s, 3H), 1.09 (d, *J* = 6.5 Hz, 6H). <sup>13</sup>C NMR (126 MHz, Chloroform-*d*) δ 196.61, 191.52, 166.53, 163.62, 162.56, 159.79, 132.66, 132.17, 130.64, 130.36, 129.58, 125.85, 115.34, 113.75, 112.62, 103.00, 55.46, 36.82, 32.31, 28.13, 19.02, 18.49.

HRMS (ESI) *m/z* calculated for C<sub>26</sub>H<sub>26</sub>N<sub>2</sub>O<sub>4</sub>S [M+H]<sup>+</sup> 463.1687, found 463.1686.

### (*E*)-1-(4-Methoxyphenyl)-6-phenylhex-5-ene-1,4-dione (3nd)

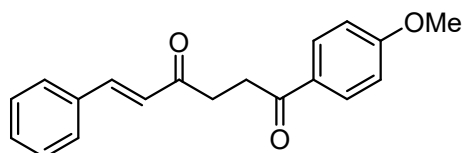

White solid. <sup>1</sup>H NMR (500 MHz, Chloroform-*d*) δ 8.03 – 7.98 (m, 2H), 7.64 (d, *J* = 16.5 Hz, 1H), 7.59 – 7.55 (m, 2H), 7.42 – 7.38 (m, 3H), 6.97 – 6.92 (m, 2H), 6.82 (d, *J* = 16.5 Hz, 1H), 3.87 (s, 3H), 3.35 (t, *J* = 6.5 Hz, 2H), 3.14 (t, *J* = 6.5 Hz, 2H). <sup>13</sup>C NMR (126 MHz, Chloroform-*d*) δ 198.84, 197.16, 163.51, 142.75, 134.51, 130.42, 130.35, 129.82, 128.91, 128.29, 126.19, 113.70, 55.45, 34.51, 32.23.

The spectroscopic data matched literature values.<sup>17</sup>

### 1-(4-Methoxyphenyl)-7-methyloctane-1,4-dione (3od)

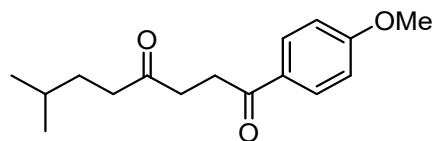

Light green solid (29.1 mg, 56%). <sup>1</sup>H NMR (500 MHz, Chloroform-*d*) δ 7.97 – 7.93 (m, 2H), 6.94 – 6.89 (m, 2H), 3.85 (s, 3H), 3.24 – 3.20 (m, 2H), 2.83 (t, *J* = 6.5 Hz, 2H), 2.54 – 2.49 (m, 2H), 1.59

– 1.47 (m, 3H), 0.89 (d,  $J = 6.5$  Hz, 6H).  $^{13}\text{C}$  NMR (126 MHz, Chloroform- $d$ )  $\delta$  210.05, 197.15, 163.44, 130.25, 129.76, 113.64, 55.40, 41.03, 36.20, 32.62, 31.98, 27.69, 22.31. The spectroscopic data matched literature values.<sup>19</sup>

#### 1-(4-Methoxyphenyl)-5,5-dimethylhexane-1,4-dione (3pd)

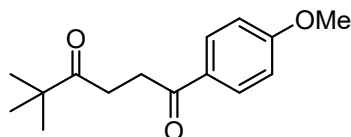

Colorless liquid (3mg, 6%).  $^1\text{H}$  NMR (500 MHz, Chloroform- $d$ )  $\delta$  8.02 – 7.98 (m, 2H), 6.98 – 6.93 (m, 2H), 3.89 (s, 3H), 3.23 (t,  $J = 6.5$  Hz, 2H), 2.97 (t,  $J = 6.5$  Hz, 2H), 1.23 (s, 9H).  $^{13}\text{C}$  NMR (126 MHz, Chloroform- $d$ )  $\delta$  214.81, 197.44, 163.43, 130.28, 129.95, 113.66, 55.44, 44.07, 32.03, 30.82, 26.63.

The spectroscopic data matched literature values.<sup>20</sup>

#### 1-Cyclohexyl-4-(4-methoxyphenyl)butane-1,4-dione (3qd)

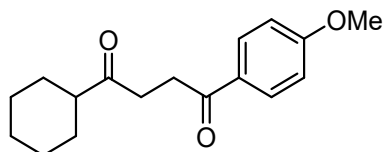

White solid (35.9 mg, 66%).  $^1\text{H}$  NMR (500 MHz, Chloroform- $d$ )  $\delta$  7.98 – 7.94 (m, 2H), 6.94 – 6.90 (m, 2H), 3.86 (s, 3H), 3.24 – 3.19 (m, 2H), 2.87 (m, 2H), 2.46 (tt,  $J = 11.5, 3.5$  Hz, 1H), 1.95 – 1.88 (m, 2H), 1.79 (dt,  $J = 12.5, 3.5$  Hz, 2H), 1.70 – 1.64 (m, 1H), 1.43 – 1.15 (m, 6H).  $^{13}\text{C}$  NMR (126 MHz, Chloroform- $d$ )  $\delta$  212.80, 197.28, 163.44, 130.27, 129.85, 113.65, 55.43, 50.92, 34.30, 31.94, 28.56, 25.87, 25.67.

HRMS (FI)  $m/z$  calcd. for  $\text{C}_{17}\text{H}_{22}\text{O}_3$   $[\text{M}]^+$  274.1564, found 274.1560.

#### 1,4-Diphenylbutane-1,4-dione (3aa)

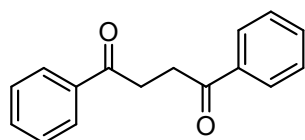

Colorless liquid (37.5 mg, 79%).  $^1\text{H}$  NMR (500 MHz, Chloroform- $d$ )  $\delta$  8.06 – 8.02 (m, 4H), 7.60 – 7.55 (m, 2H), 7.50 – 7.45 (m, 4H), 3.46 (s, 4H).  $^{13}\text{C}$  NMR (126 MHz, Chloroform- $d$ )  $\delta$  198.62, 136.72, 133.10, 128.55, 128.07, 32.54.

The spectroscopic data matched literature values.<sup>21</sup>

#### 1-Phenyl-4-(*p*-tolyl)butane-1,4-dione (3ab)

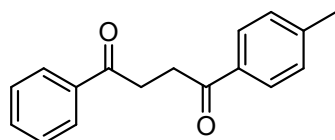

White solid (31.2 mg, 62%).  $^1\text{H}$  NMR (500 MHz, Chloroform- $d$ )  $\delta$  8.06 – 8.02 (m, 2H), 7.96 – 7.92 (m, 2H), 7.59 – 7.55 (m, 1H), 7.50 – 7.45 (m, 2H), 7.29 – 7.25 (m, 2H), 3.46 – 3.42 (m, 4H), 2.42 (s, 3H).  $^{13}\text{C}$  NMR (126 MHz, Chloroform- $d$ )  $\delta$  198.75, 198.26, 143.87, 136.77, 134.26, 133.07, 129.22, 128.54, 128.19, 128.08, 32.58, 32.44, 21.61.

The spectroscopic data matched literature values.<sup>12</sup>

### 1-(4-Cyclohexylphenyl)-4-phenylbutane-1,4-dione (3ac)

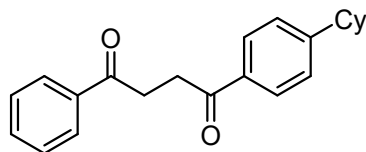

White solid (43.3 mg, 68%). <sup>1</sup>H NMR (500 MHz, Chloroform-*d*) δ 8.06 – 8.02 (m, 2H), 7.99 – 7.95 (m, 2H), 7.59 – 7.54 (m, 1H), 7.50 – 7.44 (m, 2H), 7.33 – 7.29 (m, 2H), 3.48 – 3.41 (m, 4H), 2.57 (tt, *J* = 11.5, 3.5 Hz, 1H), 1.92 – 1.83 (m, 4H), 1.80 – 1.74 (m, 1H), 1.49 – 1.35 (m, 4H), 1.32 – 1.22 (m, 1H). <sup>13</sup>C NMR (126 MHz, Chloroform-*d*) δ 198.73, 198.28, 153.74, 136.76, 134.58, 133.04, 128.52, 128.29, 128.06, 127.02, 44.65, 34.06, 32.60, 32.43, 26.68, 25.99.

HRMS (FI) *m/z* calcd. for C<sub>22</sub>H<sub>24</sub>O<sub>2</sub> [M]<sup>+</sup> 320.1771, found 320.1766.

### 1-(4-Fluorophenyl)-4-phenylbutane-1,4-dione (3ae)

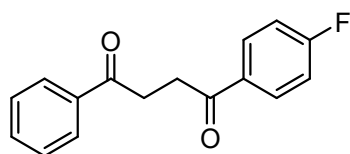

White solid (39.8 mg, 77%). <sup>1</sup>H NMR (500 MHz, Chloroform-*d*) δ 8.09 – 8.01 (m, 4H), 7.60 – 7.55 (m, 1H), 7.51 – 7.45 (m, 2H), 7.17 – 7.12 (m, 2H), 3.48 – 3.44 (m, 2H), 3.44 – 3.40 (m, 2H). <sup>13</sup>C NMR (126 MHz, Chloroform-*d*) δ 198.53, 197.05, 166.77, 164.74, 136.66, 133.19, 133.17, 130.75, 130.68, 128.58, 128.07, 115.73, 115.56, 32.53, 32.41. <sup>19</sup>F NMR (471 MHz, Chloroform-*d*) δ -105.24.

The spectroscopic data matched literature values.<sup>22</sup>

### 1-(4-Chlorophenyl)-4-phenylbutane-1,4-dione (3af)

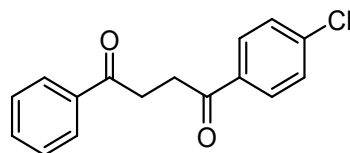

White solid (28.8 mg, 53%). <sup>1</sup>H NMR (500 MHz, Chloroform-*d*) δ 8.05 – 8.01 (m, 2H), 7.99 – 7.95 (m, 2H), 7.60 – 7.55 (m, 1H), 7.50 – 7.42 (m, 4H), 3.48 – 3.44 (m, 2H), 3.43 – 3.39 (m, 2H). <sup>13</sup>C NMR (126 MHz, Chloroform-*d*) δ 198.43, 197.43, 139.51, 136.61, 135.06, 133.17, 129.50, 128.86, 128.57, 128.06, 32.50, 32.45.

The spectroscopic data matched literature values.<sup>18</sup>

### Methyl 4-(4-oxo-4-phenylbutanoyl)benzoate (3ag)

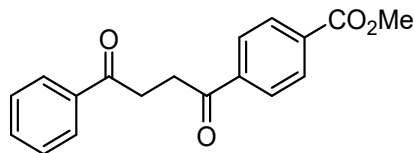

White solid (47.3 mg, 80%). <sup>1</sup>H NMR (500 MHz, Chloroform-*d*) δ 8.16 – 8.12 (m, 2H), 8.10 – 8.07 (m, 2H), 8.05 – 8.02 (m, 2H), 7.61 – 7.56 (m, 1H), 7.51 – 7.46 (m, 2H), 3.95 (s, 3H), 3.49 – 3.45 (m, 4H). <sup>13</sup>C NMR (126 MHz, Chloroform-*d*) δ 198.28, 198.13, 166.12, 139.90, 136.54, 133.80, 133.14, 129.74, 128.53, 128.01, 127.94, 32.80, 32.44.

The spectroscopic data matched literature values.<sup>23</sup>

### 1-Phenyl-4-(4-(trifluoromethyl)phenyl)butane-1,4-dione (3ah)

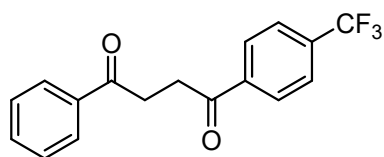

White solid (44.9 mg, 73%). <sup>1</sup>H NMR (500 MHz, Chloroform-*d*) δ 8.15 (d, *J* = 7.5 Hz, 2H), 8.05 – 8.02 (m, 2H), 7.76 (d, *J* = 8.0 Hz, 2H), 7.61 – 7.57 (m, 1H), 7.51 – 7.47 (m, 2H), 3.52 – 3.44 (m, 4H). <sup>13</sup>C NMR (126 MHz, Chloroform-*d*) δ 198.30, 197.81, 139.46, 136.57, 133.30, 128.65, 128.45, 128.11, 125.74, 125.71, 125.68, 125.65, 32.79, 32.55. <sup>19</sup>F NMR (471 MHz, Chloroform-*d*) δ -63.10. The spectroscopic data matched literature values.<sup>24</sup>

### 1-(4-Nitrophenyl)-4-phenylbutane-1,4-dione (3ai/3ua)

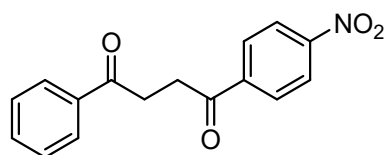

Yellow solid (42 mg, 74%). <sup>1</sup>H NMR (500 MHz, Chloroform-*d*) δ 8.34 – 8.30 (m, 2H), 8.20 – 8.16 (m, 2H), 8.04 – 8.00 (m, 2H), 7.61 – 7.56 (m, 1H), 7.51 – 7.46 (m, 2H), 3.53 – 3.49 (m, 2H), 3.48 – 3.44 (m, 2H). <sup>13</sup>C NMR (126 MHz, Chloroform-*d*) δ 198.09, 197.30, 150.30, 141.24, 136.39, 133.35, 129.11, 128.63, 128.06, 123.81, 32.96, 32.56.

The spectroscopic data matched literature values.<sup>25</sup>

### 1-(2-Methoxyphenyl)-4-phenylbutane-1,4-dione (3aj)

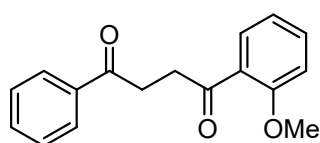

White solid (27.4 mg, 51%). <sup>1</sup>H NMR (500 MHz, Chloroform-*d*) δ 8.05 – 8.01 (m, 2H), 7.77 (dd, *J* = 7.5, 2.0 Hz, 1H), 7.59 – 7.54 (m, 1H), 7.50 – 7.44 (m, 3H), 7.04 – 6.96 (m, 2H), 3.94 – 3.90 (m, 3H), 3.50 – 3.44 (m, 2H), 3.44 – 3.38 (m, 2H). <sup>13</sup>C NMR (126 MHz, Chloroform-*d*) δ 200.57, 199.03, 158.78, 136.91, 133.55, 132.95, 130.47, 128.55, 128.50, 128.08, 127.81, 120.61, 111.53, 55.50, 37.91, 32.97.

The spectroscopic data matched literature values.<sup>16</sup>

### 1-(2-Fluorophenyl)-4-phenylbutane-1,4-dione (3ak)

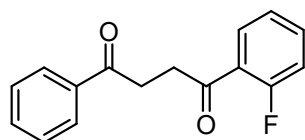

White solid (24.6 mg, 48%). <sup>1</sup>H NMR (500 MHz, Chloroform-*d*) δ 8.05 – 8.01 (m, 2H), 7.90 (td, *J* = 7.5, 2.0 Hz, 1H), 7.59 – 7.54 (m, 1H), 7.54 – 7.49 (m, 1H), 7.49 – 7.44 (m, 2H), 7.22 (td, *J* = 7.5, 1.0 Hz, 1H), 7.15 (ddd, *J* = 11.0, 8.0, 1.0 Hz, 1H), 3.48 – 3.41 (m, 4H). <sup>13</sup>C NMR (126 MHz, Chloroform-*d*) δ 198.40, 196.89, 196.86, 163.07, 161.04, 136.70, 134.56, 134.49, 133.04, 130.63, 130.60, 128.51, 128.04, 125.44, 125.33, 124.37, 124.34, 116.73, 116.54, 37.36, 37.30, 32.51, 32.49. <sup>19</sup>F NMR (471 MHz, Chloroform-*d*) δ -108.95.

HRMS (FI) *m/z* calcd. for C<sub>16</sub>H<sub>13</sub>O<sub>2</sub>F [M]<sup>+</sup> 256.0894, found 256.0876.



### 1-(3-Methoxyphenyl)-4-phenylbutane-1,4-dione (3al)

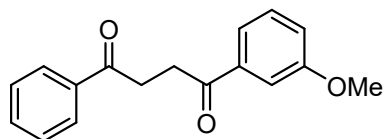

White solid (32 mg, 60%). <sup>1</sup>H NMR (500 MHz, Chloroform-*d*) δ 8.05 – 8.01 (m, 2H), 7.65 – 7.62 (m, 1H), 7.59 – 7.55 (m, 1H), 7.54 (dd, *J* = 2.5, 1.5 Hz, 1H), 7.50 – 7.45 (m, 2H), 7.38 (t, *J* = 8.0 Hz, 1H), 7.12 (ddd, *J* = 8.5, 3.0, 1.0 Hz, 1H), 3.85 (s, 3H), 3.45 (s, 4H). <sup>13</sup>C NMR (126 MHz, Chloroform-*d*) δ 198.59, 198.43, 159.76, 138.06, 136.71, 133.08, 129.54, 128.53, 128.05, 120.74, 119.64, 112.22, 55.38, 32.67, 32.54.

The spectroscopic data matched literature values.<sup>18</sup>

### 1-(3-Fluorophenyl)-4-phenylbutane-1,4-dione (3am)

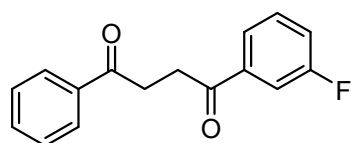

White solid (37.2 mg, 73%). <sup>1</sup>H NMR (500 MHz, Chloroform-*d*) δ 8.05 – 8.01 (m, 2H), 7.83 (dt, *J* = 8.0, 1.5 Hz, 1H), 7.71 (ddd, *J* = 9.5, 2.5, 1.5 Hz, 1H), 7.60 – 7.55 (m, 1H), 7.51 – 7.43 (m, 3H), 7.30 – 7.25 (m, 1H), 3.49 – 3.45 (m, 2H), 3.44 – 3.40 (m, 2H). <sup>13</sup>C NMR (126 MHz, Chloroform-*d*) δ 198.38, 197.43, 197.41, 163.81, 161.84, 138.85, 138.80, 136.61, 133.19, 130.27, 130.21, 128.59, 128.07, 123.87, 123.85, 120.19, 120.02, 114.90, 114.73, 32.66, 32.49. <sup>19</sup>F NMR (471 MHz, Chloroform-*d*) δ -111.89.

The spectroscopic data matched literature values.<sup>26</sup>

### 1-(3,5-Bis(trifluoromethyl)phenyl)-4-phenylbutane-1,4-dione (3an)

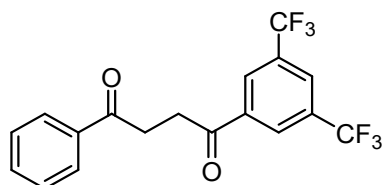

White solid (49.1 mg, 65%). <sup>1</sup>H NMR (500 MHz, Chloroform-*d*) δ 8.47 (t, *J* = 1.0 Hz, 2H), 8.08 (t, *J* = 1.5 Hz, 1H), 8.05 – 8.01 (m, 2H), 7.61 – 7.57 (m, 1H), 7.51 – 7.46 (m, 2H), 3.56 – 3.51 (m, 2H), 3.49 – 3.45 (m, 2H). <sup>13</sup>C NMR (126 MHz, Chloroform-*d*) δ 197.99, 196.03, 138.26, 136.36, 133.41, 132.74, 132.47, 132.20, 131.93, 128.66, 128.49, 128.20, 128.17, 128.14, 128.09, 126.34, 126.31, 126.28, 126.25, 126.22, 126.16, 123.99, 121.82, 119.65, 32.63, 32.54. <sup>19</sup>F NMR (471 MHz, Chloroform-*d*) δ -62.92.

The spectroscopic data matched literature values.<sup>27</sup>

### 2-Methyl-1,4-diphenylbutane-1,4-dione (3ao)

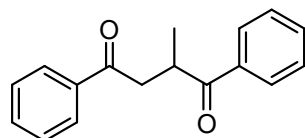

White solid (22.1 mg, 44%). <sup>1</sup>H NMR (500 MHz, Chloroform-*d*) δ 8.07 – 8.04 (m, 2H), 8.01 – 7.97 (m, 2H), 7.60 – 7.54 (m, 2H), 7.52 – 7.43 (m, 4H), 4.23 – 4.14 (m, 1H), 3.73 (dd, *J* = 18.0, 8.0 Hz, 1H), 3.12 (dd, *J* = 18.0, 5.0 Hz, 1H), 1.29 (d, *J* = 7.0 Hz, 3H). <sup>13</sup>C NMR (126 MHz, Chloroform-*d*) δ 203.38, 198.46, 136.64, 136.06, 133.16, 132.95, 128.64, 128.54, 128.49, 128.08, 42.32, 36.26, 17.94.

The spectroscopic data matched literature values.<sup>22</sup>

### 2,2-Dimethyl-1,4-diphenylbutane-1,4-dione (3ap)

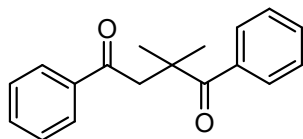

White solid (37.5 mg, 70%). <sup>1</sup>H NMR (500 MHz, Chloroform-*d*) δ 7.96 – 7.92 (m, 2H), 7.71 – 7.67 (m, 2H), 7.57 – 7.52 (m, 1H), 7.46 – 7.37 (m, 5H), 3.54 (s, 2H), 1.46 (s, 6H). <sup>13</sup>C NMR (126 MHz, Chloroform-*d*) δ 210.00, 197.67, 139.79, 136.85, 133.05, 130.14, 128.48, 127.96, 127.93, 127.90, 127.24, 50.41, 45.39, 26.82.

The spectroscopic data matched literature values.<sup>28</sup>

### 2-(1-Benzoylcyclohexyl)-1-phenylethan-1-one (3aq)

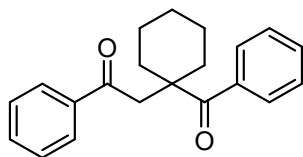

Colorless liquid (28.9 mg, 47%). <sup>1</sup>H NMR (500 MHz, Chloroform-*d*) δ 8.00 – 7.94 (m, 2H), 7.70 – 7.65 (m, 2H), 7.58 – 7.53 (m, 1H), 7.49 – 7.43 (m, 2H), 7.42 – 7.36 (m, 3H), 3.68 (s, 2H), 1.97 – 1.85 (m, 4H), 1.64 – 1.55 (m, 3H), 1.51 – 1.41 (m, 2H), 1.31 – 1.22 (m, 2H). <sup>13</sup>C NMR (126 MHz, Chloroform-*d*) δ 211.20, 198.04, 140.59, 137.10, 133.08, 129.69, 128.52, 127.97, 127.83, 127.22, 49.54, 43.93, 33.86, 25.61, 22.20.

HRMS (ESI) *m/z* calcd. for C<sub>21</sub>H<sub>22</sub>O<sub>2</sub> [M]<sup>+</sup> 306.1614, found 306.1606.

### 2-(2-Oxo-2-phenylethyl)-2,3-dihydro-1*H*-inden-1-one (3ar)

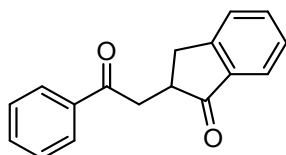

This mixture compound was prepared according to the typical procedure. Purification by column chromatography on silica gel (Petroleum ether/ Ethyl acetate = 5/1, v/v) afforded **3ar** as a lightyellow liquid (37 mg, 74%). Then the mixture compound was purified by by column chromatography on silica gel (Petroleum ether / Ethyl acetate = 10/1, v/v then Petroleum ether / dichloromethane = 1/2).

<sup>1</sup>H NMR (500 MHz, Chloroform-*d*) δ 8.01 – 7.97 (m, 2H), 7.81 (d, *J* = 7.5 Hz, 1H), 7.63 – 7.55 (m, 2H), 7.50 – 7.45 (m, 3H), 7.40 (t, *J* = 7.5 Hz, 1H), 3.77 (dd, *J* = 17.5, 2.5 Hz, 1H), 3.56 (dd, *J* = 17.0, 7.5 Hz, 1H), 3.26 (dd, *J* = 17.5, 9.5 Hz, 1H), 3.23 – 3.17 (m, 1H), 2.85 (dd, *J* = 17.0, 4.0 Hz, 1H). <sup>13</sup>C NMR (126 MHz, Chloroform-*d*) δ 207.89, 197.95, 153.58, 136.51, 136.44, 134.80, 133.33, 128.66, 128.08, 127.41, 126.54, 123.89, 43.19, 40.02, 33.57.

The spectroscopic data matched literature values.<sup>29</sup>

<sup>1</sup>H NMR (500 MHz, Chloroform-*d*) δ 8.08 (dd, *J* = 8.0, 1.5 Hz, 1H), 8.00 – 7.96 (m, 2H), 7.64 – 7.59 (m, 1H), 7.53 – 7.48 (m, 3H), 7.39 – 7.34 (m, 1H), 7.26 (d, *J* = 7.5 Hz, 1H), 4.25 – 4.18 (m, 1H), 3.34 – 3.26 (m, 1H), 3.20 (dd, *J* = 16.5, 4.5 Hz, 1H), 2.94 – 2.90 (m, 2H). <sup>13</sup>C NMR (126 MHz, Chloroform-*d*) δ 199.79, 196.45, 141.68, 135.14, 133.91, 133.62, 131.98, 128.95, 128.85, 128.44, 127.21, 127.19, 42.65, 41.25, 32.63.

HRMS (ESI)  $m/z$  calcd. for  $C_{17}H_{14}O_2$   $[M+H]^+$  251.1067, found 251.1061.

### 2-(2-Oxo-2-phenylethyl)-3,4-dihydronaphthalen-1(2H)-one (3as)

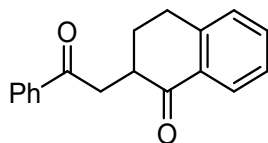

White solid (32.6 mg, 62%).  $^1H$  NMR (500 MHz, Chloroform-*d*)  $\delta$  8.04 (dt,  $J = 8.5, 1.5$  Hz, 3H), 7.60 – 7.55 (m, 1H), 7.50 – 7.45 (m, 3H), 7.33 – 7.29 (m, 1H), 7.26 (d,  $J = 8.0$  Hz, 1H), 3.86 (dd,  $J = 17.5, 5.0$  Hz, 1H), 3.36 – 3.29 (m, 1H), 3.23 – 3.14 (m, 1H), 3.02 – 2.95 (m, 2H), 2.33 – 2.27 (m, 1H), 1.99 (qd,  $J = 13.0, 4.5$  Hz, 1H).  $^{13}C$  NMR (126 MHz, Chloroform-*d*)  $\delta$  198.98, 198.51, 144.11, 136.99, 133.33, 133.06, 132.26, 128.74, 128.56, 128.11, 127.44, 126.57, 44.21, 38.99, 29.54, 29.37. The spectroscopic data matched literature values.<sup>30</sup>

### 1-(Naphthalen-1-yl)-4-phenylbutane-1,4-dione (3at)

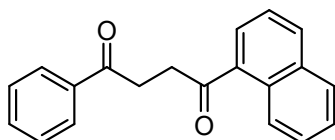

White Solid. (47.6 mg, 83%).  $^1H$  NMR (500 MHz, Chloroform-*d*)  $\delta$  8.63 (dd,  $J = 8.5, 1.0$  Hz, 1H), 8.09 – 8.04 (m, 3H), 7.99 (dt,  $J = 8.5, 1.0$  Hz, 1H), 7.88 (dd,  $J = 8.0, 1.5$  Hz, 1H), 7.61 – 7.56 (m, 2H), 7.56 – 7.51 (m, 2H), 7.51 – 7.47 (m, 2H), 3.56 – 3.48 (m, 4H).  $^{13}C$  NMR (126 MHz, Chloroform-*d*)  $\delta$  202.77, 198.54, 136.70, 135.89, 133.85, 133.08, 132.49, 130.05, 128.53, 128.29, 128.05, 127.78, 127.55, 126.33, 125.78, 124.37, 35.87, 32.96.

The spectroscopic data matched literature values.<sup>18</sup>

### 1-Phenyl-4-(thiophen-2-yl)butane-1,4-dione (3au)

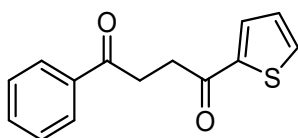

Light yellow solid (15.8 mg, 32%).  $^1H$  NMR (500 MHz, Chloroform-*d*)  $\delta$  8.05 – 8.01 (m, 2H), 7.84 (dd,  $J = 4.0, 1.5$  Hz, 1H), 7.64 (dd,  $J = 5.0, 1.0$  Hz, 1H), 7.59 – 7.55 (m, 1H), 7.50 – 7.45 (m, 2H), 7.15 (dd,  $J = 5.0, 4.0$  Hz, 1H), 3.48 – 3.44 (m, 2H), 3.43 – 3.38 (m, 2H).  $^{13}C$  NMR (126 MHz, Chloroform-*d*)  $\delta$  198.41, 191.58, 143.87, 136.63, 133.53, 133.18, 132.01, 128.58, 128.09, 33.15, 32.59.

The spectroscopic data matched literature values.<sup>18</sup>

### 1-(Benzo[b]thiophen-2-yl)-4-phenylbutane-1,4-dione (3av/3va)

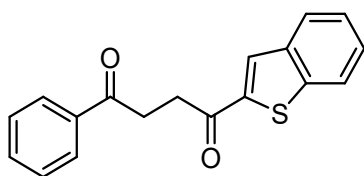

Yellow solid (35.4 mg, 60%).  $^1H$  NMR (500 MHz, Chloroform-*d*)  $\delta$  8.08 (d,  $J = 0.5$  Hz, 1H), 8.05 – 8.01 (m, 2H), 7.89 (ddt,  $J = 18.0, 8.0, 1.0$  Hz, 2H), 7.60 – 7.55 (m, 1H), 7.50 – 7.44 (m, 3H), 7.43 – 7.39

(m, 1H), 3.52 – 3.46 (m, 4H). <sup>13</sup>C NMR (126 MHz, Chloroform-*d*) δ 198.25, 193.12, 143.21, 142.41, 139.10, 136.55, 133.20, 129.20, 128.58, 128.07, 127.34, 125.93, 124.94, 122.92, 33.06, 32.62.  
HRMS (FI) *m/z* calcd. for C<sub>18</sub>H<sub>14</sub>O<sub>2</sub>S [M]<sup>+</sup> 294.0709, found 294.0701.

### 1-Phenylnonane-1,4-dione (3aw)

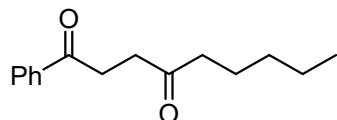

Colorless liquid (26 mg, 56%). <sup>1</sup>H NMR (500 MHz, Chloroform-*d*) δ 7.99 – 7.95 (m, 2H), 7.57 – 7.52 (m, 1H), 7.47 – 7.42 (m, 2H), 3.27 (dd, *J* = 7.0, 5.5 Hz, 2H), 2.85 (t, *J* = 6.5 Hz, 2H), 2.51 (t, *J* = 7.5 Hz, 2H), 1.61 (p, *J* = 7.5 Hz, 2H), 1.37 – 1.24 (m, 5H), 0.89 (t, *J* = 7.0 Hz, 3H). <sup>13</sup>C NMR (126 MHz, Chloroform-*d*) δ 209.73, 198.63, 136.65, 133.06, 128.51, 127.99, 42.93, 36.13, 32.32, 31.37, 23.52, 22.41, 13.88.

The spectroscopic data matched literature values.<sup>31</sup>

### 1-Cyclopentyl-4-phenylbutane-1,4-dione (3ax)

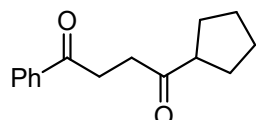

Colorless liquid (32.8 mg, 71%). <sup>1</sup>H NMR (500 MHz, Chloroform-*d*) δ 8.00 – 7.96 (m, 2H), 7.57 – 7.52 (m, 1H), 7.47 – 7.42 (m, 2H), 3.29 – 3.25 (m, 2H), 2.98 (p, *J* = 8.0 Hz, 1H), 2.91 (dd, *J* = 6.5, 5.5 Hz, 2H), 1.91 – 1.77 (m, 4H), 1.69 – 1.54 (m, 4H). <sup>13</sup>C NMR (126 MHz, Chloroform-*d*) δ 211.70, 198.74, 136.71, 133.01, 128.49, 127.99, 51.44, 35.28, 32.33, 28.90, 25.97.  
HRMS (ESI) *m/z* calcd. for C<sub>15</sub>H<sub>18</sub>O<sub>2</sub> [M+H]<sup>+</sup> 231.1380, found 231.1374.

### 2-Methyltridecane-5,8-dione (3ow)

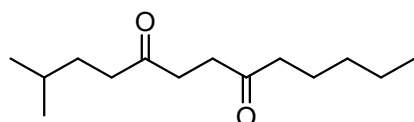

Yellow liquid (19.9 mg, 44%). <sup>1</sup>H NMR (500 MHz, Chloroform-*d*) δ 2.68 – 2.64 (m, 4H), 2.46 – 2.40 (m, 4H), 1.60 – 1.49 (m, 3H), 1.48 – 1.43 (m, 2H), 1.32 – 1.22 (m, 4H), 0.89 – 0.85 (m, 9H). <sup>13</sup>C NMR (126 MHz, Chloroform-*d*) δ 209.87, 209.77, 42.80, 40.86, 35.97, 35.94, 32.59, 31.34, 27.66, 23.49, 22.40, 22.29, 13.86.  
HRMS (ESI) *m/z* calcd. for C<sub>14</sub>H<sub>26</sub>O<sub>2</sub> [M+H]<sup>+</sup> 227.2006, found 227.2002.

### 1-Phenylundecane-3,6-dione (3rw)

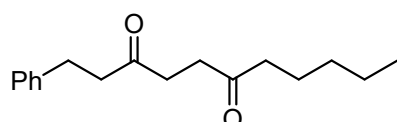

Yellow liquid. (24.1 mg, 44%) <sup>1</sup>H NMR (500 MHz, Chloroform-*d*) δ 7.30 – 7.25 (m, 2H), 7.21 – 7.16 (m, 3H), 2.92 – 2.88 (m, 2H), 2.82 – 2.77 (m, 2H), 2.70 – 2.64 (m, 4H), 2.44 (t, *J* = 7.5 Hz, 2H), 1.58 (p, *J* = 7.5 Hz, 2H), 1.34 – 1.24 (m, 4H), 0.89 (t, *J* = 7.5 Hz, 3H). <sup>13</sup>C NMR (126 MHz,

Chloroform-*d*)  $\delta$  209.68, 208.53, 140.98, 128.43, 128.24, 126.03, 44.28, 42.76, 36.14, 35.97, 31.34, 29.69, 23.49, 22.40, 13.88.

HRMS (ESI)  $m/z$  calcd. for  $C_{17}H_{24}O_2$   $[M+H]^+$  261.1849, found 261.1842.

### 1-(Benzo[d][1,3]dioxol-5-yl)-4-phenylbutane-1,4-dione (3ta)

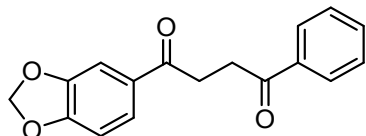

White solid (30.3 mg, 53%).  $^1H$  NMR (500 MHz, Chloroform-*d*)  $\delta$  8.05 – 8.02 (m, 2H), 7.67 (dd,  $J = 8.0, 2.0$  Hz, 1H), 7.60 – 7.55 (m, 1H), 7.50 – 7.45 (m, 3H), 6.87 (d,  $J = 8.0$  Hz, 1H), 6.05 (s, 2H), 3.46 – 3.42 (m, 2H), 3.40 – 3.36 (m, 2H).  $^{13}C$  NMR (126 MHz, Chloroform-*d*)  $\delta$  198.74, 196.69, 151.77, 148.14, 136.76, 133.12, 131.64, 128.57, 128.10, 124.38, 107.93, 107.89, 101.80, 32.69, 32.31.

The spectroscopic data matched literature values.<sup>18</sup>

### 2-Clopropyl-1,4-diphenylbutane-1,4-dione (3ay)

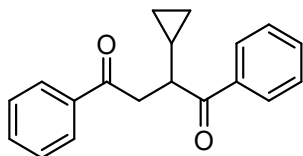

Colorless liquid (27.3 mg, 50%).  $^1H$  NMR (500 MHz, Chloroform-*d*)  $\delta$  8.06 – 8.02 (m, 2H), 8.01 – 7.97 (m, 2H), 7.60 – 7.53 (m, 2H), 7.51 – 7.43 (m, 4H), 3.92 (dd,  $J = 18.0, 9.5$  Hz, 1H), 3.46 (td,  $J = 9.5, 3.5$  Hz, 1H), 3.32 (dd,  $J = 18.0, 3.5$  Hz, 1H), 1.31 (d,  $J = 25.5$  Hz, 1H), 0.98 – 0.90 (m, 1H), 0.56 – 0.54 (m, 1H), 0.49 – 0.42 (m, 1H), 0.32 – 0.21 (m, 2H).  $^{13}C$  NMR (126 MHz, Chloroform-*d*)  $\delta$  202.80, 198.75, 137.70, 136.51, 133.18, 132.79, 128.61, 128.53, 128.12, 45.25, 41.96, 13.85, 4.68, 4.14.

HRMS (FI)  $m/z$  calcd. for  $C_{19}H_{18}O_2$   $[M]^+$  278.1301, found 278.1293.

## Mechanistic Studies

### Coupling of cyclopropanol and amide in the presence of BHT

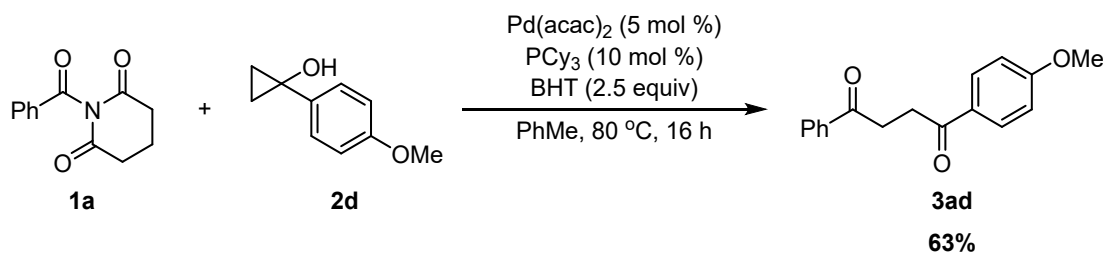

A 10 mL oven-dried reaction vessel equipped with a magnetic stir bar was charged with **1a** (0.2 mmol, 1.0 equiv, 43.4 mg), **2d** (0.25 mmol, 1.25 equiv, 41mg),  $Pd(acac)_2$  (0.01 mol, 0.05 equiv, 3.1 mg), and BHT (0.3 mmol, 2.5 equiv, 110.2 mg). The vessel was capped with a rubber septum and then transferred to the glove.  $PCy_3$  (10 mol %, 0.02 mmol, 5.6 mg) then was added and removed from glove. The reaction mixture was resolved in PhMe (2 mL) and allowed to stir at 80 °C for 16 h. The reaction was cooled to room temperature then mixture was filtered on celite and concentrated to yield the crude product, which was further purified by flash chromatography (Petroleum ether / Ethyl acetate = 5/1) to give the desired product **3aa** in 63% of yield. No trapped

intermediate is detected.

### Radical clock experiment

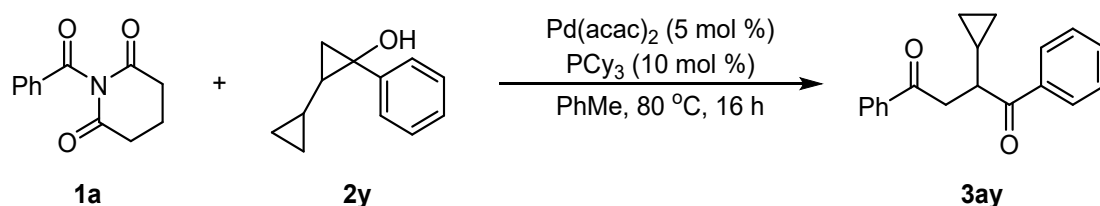

A 10 mL oven-dried reaction vessel equipped with a magnetic stir bar was charged with **1a** (0.2 mmol, 1.0 equiv, 43.4 mg), **2aa** (1.25 equiv, 0.25 mmol, 41mg), Pd(acac)<sub>2</sub> (0.01 mol, 0.05 equiv, 3.1 mg). The vessel was capped with a rubber septum and then transferred to the glove. PCy<sub>3</sub> (10 mol %, 0.02 mmol, 5.6 mg) then was added and removed from glove. The reaction mixture was resolved in PhMe (2 mL) and allowed to stir at 80 °C for 16 h. The reaction was cooled to room temperature then mixture was filtered on celite and concentrated to yield the crude product, which was further purified by flash chromatography (Petroleum ether / ethyl acetate = 5/1) to give the desired product **3aaa** in 50% yields, no cyclopropyl-opening product was observed.

### NMR spectrum evidence for the release of glutarimide.

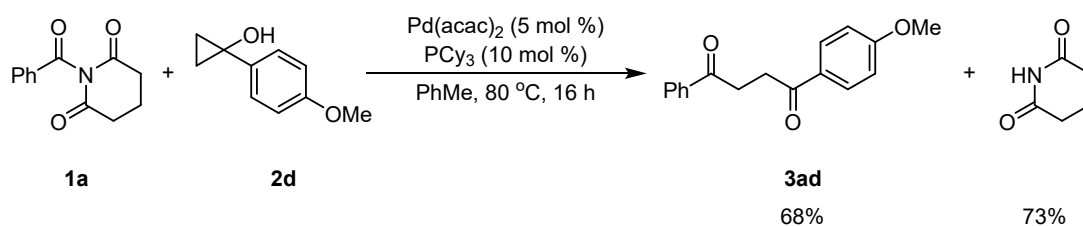

A 10 mL oven-dried reaction vessel equipped with a magnetic stir bar was charged with **1a** (0.2 mmol, 1.0 equiv, 43.4 mg), **2d** (0.25 mmol, 1.25 equiv, 41mg), Pd(acac)<sub>2</sub> (0.01 mol, 0.05 equiv, 3.1 mg). The vessel was capped with a rubber septum and then transferred to the glove. PCy<sub>3</sub> (10 mol %, 0.02 mmol, 5.6 mg) then was added and removed from glove. The reaction mixture was resolved in Toluene (2 mL) and allowed to stir at 80 °C for 16 h. After completion of reaction as monitored by TLC, solvent was removed under reduced pressure and the crude was subjected to perform an NMR test. From the NMR spectrum of the crude, we can clearly see the peak of glutarimide. Then the crude product was recovered, followed by glutarimides (0.2 mmol, 1.0 equiv, 22.6 mg) added, then was subjected to NMR test again. We can see the overlap of the peaks of glutarimide. Meanwhile, another same reaction mixture was filtered on celite and concentrated to yield crude product, which was further purified by flash chromatography (Petroleum ether / Ethyl acetate = 3/1 to Dichloromethane / Methanol = 10/1) to give the pure byproduct glutarimide in 73% (16.8 mg) yields. <sup>1</sup>H NMR (400 MHz, Chloroform-*d*) δ 7.97 (br, 1H), 2.62 – 2.56 (d, *J* = 2.0 Hz, 4H), 2.05 – 1.97 (m, 2H).

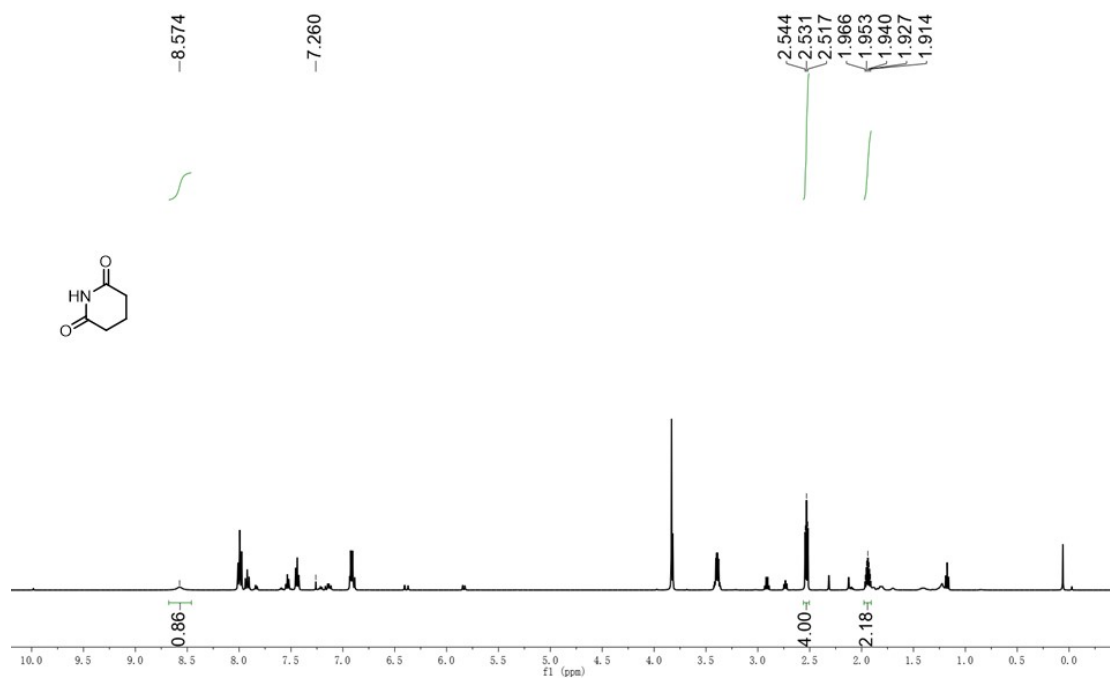

Figure S3. NMR spectrum of **3ad** crude product

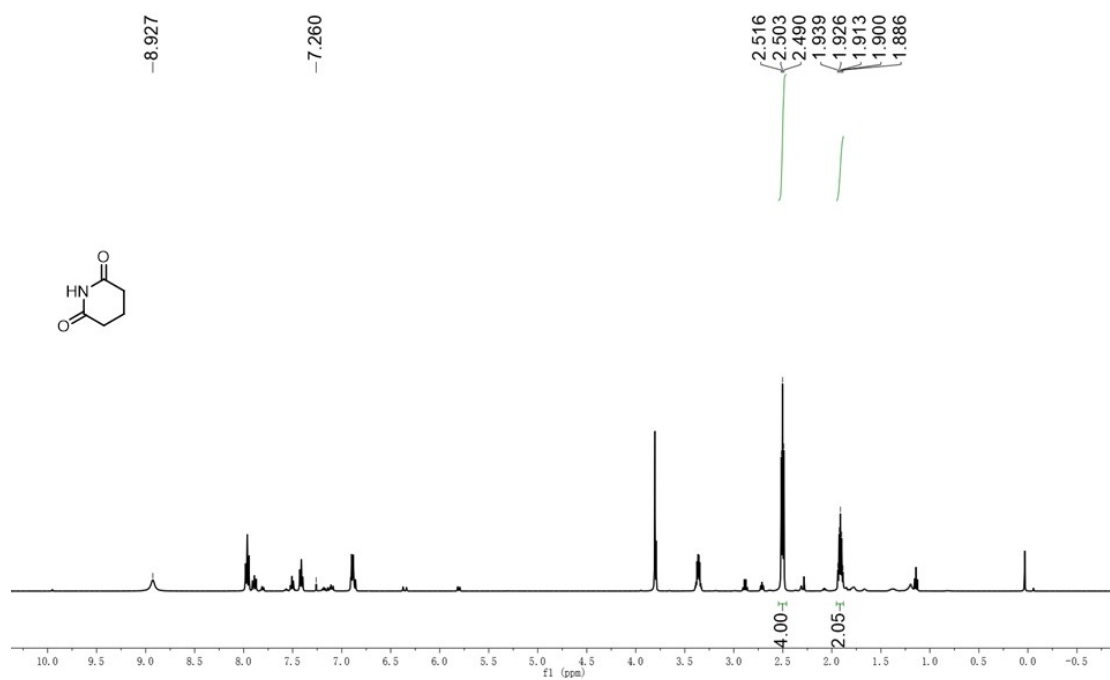

Figure S4. NMR spectrum of **3ad** crude product after 0.2 mmol glutarimide added

## Competition experiment

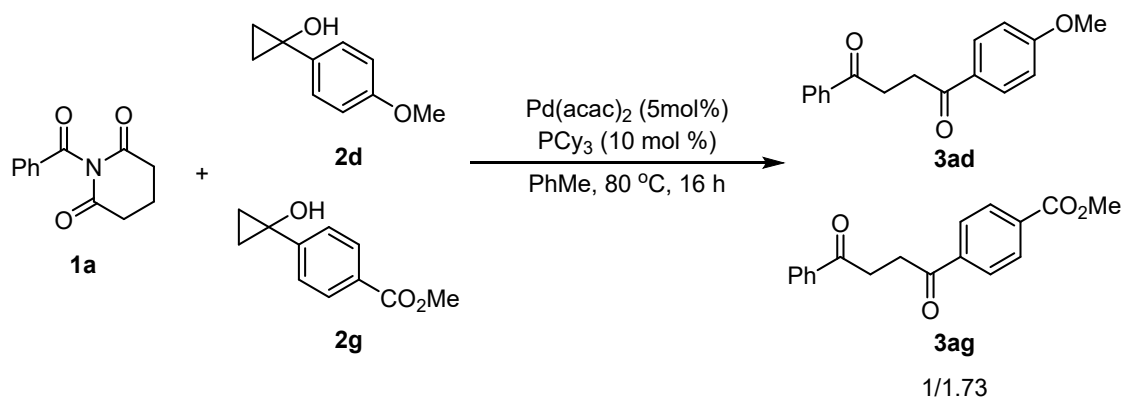

A 10 mL oven-dried reaction vessel equipped with a magnetic stir bar was charged with **1a** (0.2 mmol, 1.0 equiv, 43.4 mg), **2d** (0.2 mmol, 1.0 equiv, 32.8 mg), **2i** (0.2 mmol, 1.0 equiv, 38.4 mg) and  $\text{Pd}(\text{acac})_2$  (0.01 mol, 0.05 equiv, 3.1 mg). The vessel was capped with a rubber septum and then transferred to the glove.  $\text{PCy}_3$  (10 mol %, 0.02 mmol, 5.6 mg) then was added and removed from glove. The reaction mixture was resolved in Toluene (2 mL) and allowed to stir at  $80\text{ }^\circ\text{C}$  for 16 h. After completion of reaction as monitored by TLC, solvent was removed under reduced pressure and the crude was subjected to perform an NMR test. NMR spectrum indicates ratio of **3ad** vs **3ai** is 1/1.73.

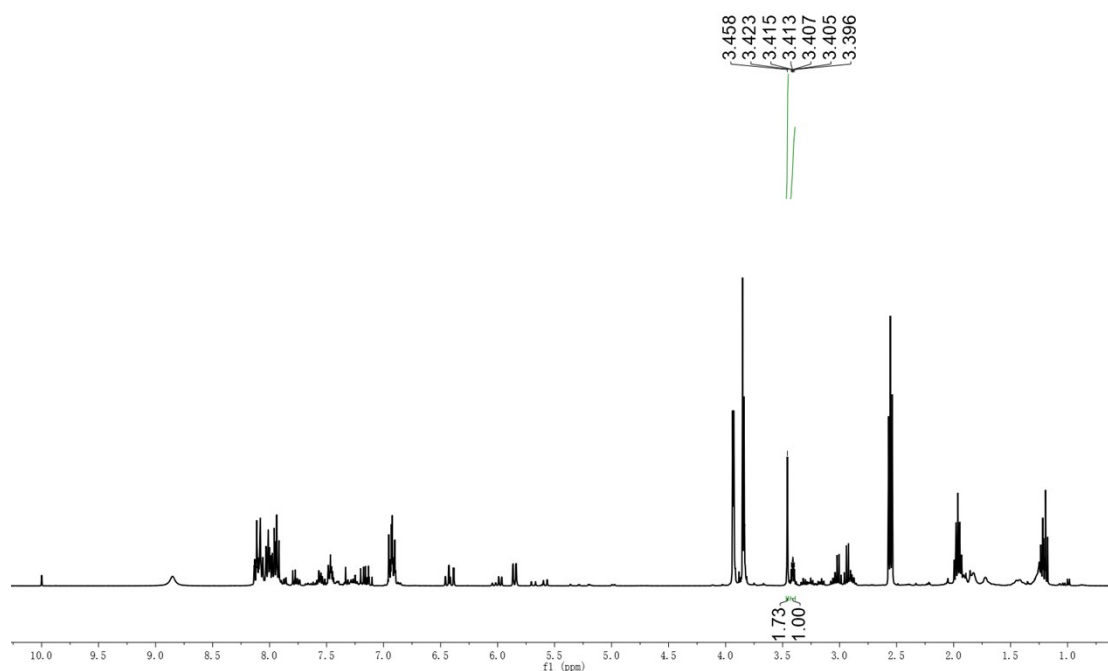

Figure S5. NMR spectrum of **3ad** and **3ai** crude product

## Control experiments

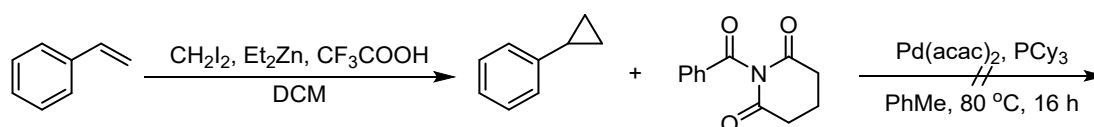



Phenylcyclopropane (**2aO**) was obtained as colorless liquid according to the literature reported before.<sup>32</sup> To a 10 mL dry test tube with stir bar was added *N*-glutarimide benzamide **1a** (0.2 mmol, 1.0 equiv, 43.4 mg), Pd(acac)<sub>2</sub> (0.01 mmol, 5 mol %, 3.1 mg). The vessel was capped with a rubber septum and then transferred to the glove. PCy<sub>3</sub> (0.02 mmol, 10 mol %, 5.6 mg) then was added and removed from glove. Phenylcyclopropane (0.25 mmol, 1.25 equiv, 29.5 mg) dissolved in 2 mL Toluene was added and stand for 16 h at 80 °C, after completion of reaction, TLC indicated that no desired product was yielded.

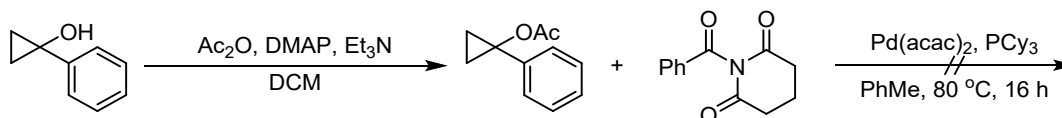

1-Phenylcyclopropyl acetate (**2aA**) was prepared according to the literature before.<sup>33</sup> To a 10 mL dry test tube with stir bar was added *N*-glutarimide benzamide **1a** (0.2 mmol, 1.0 equiv, 43.4 mg), Pd(acac)<sub>2</sub> (5 mol %, 0.01 mmol, 3.1 mg). The vessel was capped with a rubber septum and then transferred to the glove. PCy<sub>3</sub> (0.02 mmol, 10 mol %, 5.6 mg) then was added and removed from glove. 1-phenylcyclopropyl acetate (0.25 mmol, 1.25 equiv, 44 mg) dissolved in 2 mL Toluene was added and stand for 16 h at 80 °C, after completion of reaction, TLC indicated that no desired product was yielded.

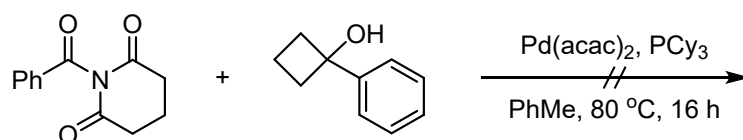

To a 10 mL dry test tube with stir bar was added *N*-glutarimide benzamide **1a** (0.2 mmol, 1.0 equiv, 43.4 mg), 1-phenylcyclobutan-1-ol (1.25 equiv, 37 mg) and Pd(acac)<sub>2</sub> (5 mol %, 0.01 mmol, 3.1 mg). The vessel was capped with a rubber septum and then transferred to the glove. PCy<sub>3</sub> (0.02 mmol, 10 mol %, 5.6 mg) then was added and removed from glove. The reaction mixture was dissolved in 2 mL Toluene and stand for 16 h at 80 °C, after cooling to room temperature, TLC indicated that no desired product was yielded.

## Proposed mechanism

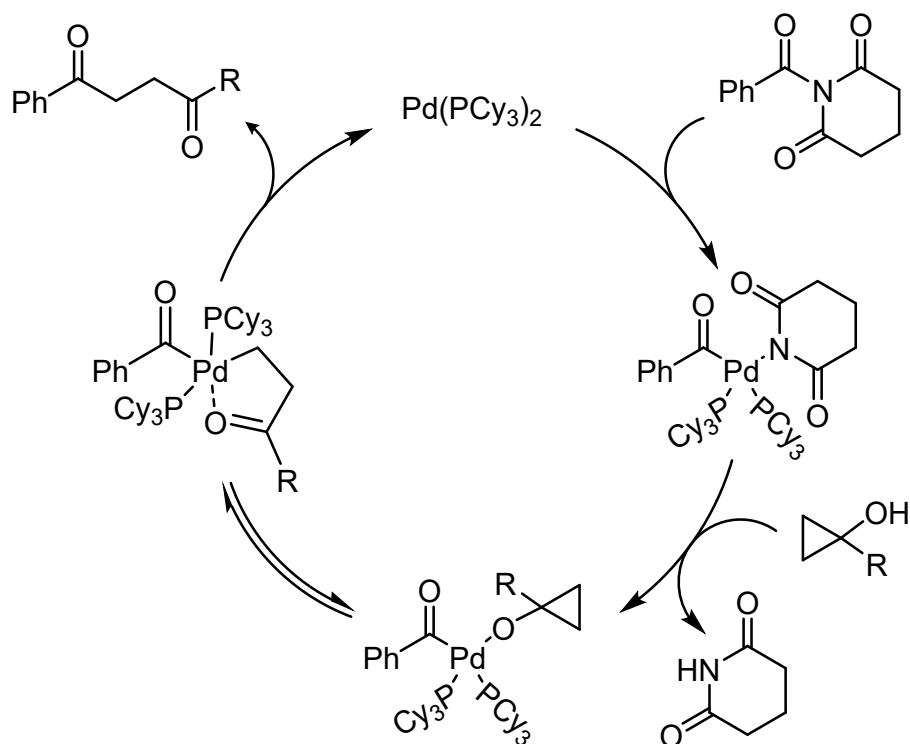

Figure S6. Proposed mechanistic cycle

## Exploration for the cross-coupling reaction of acid chloride with cyclopropanol

Table S12. Screening for the catalyst and solvent

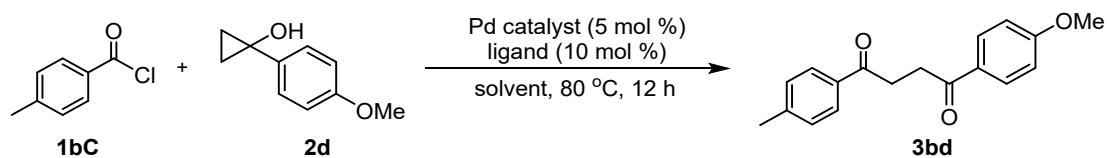

| Entry | catalyst                                         | ligand           | solvent | yield <sup>[b]</sup> |
|-------|--------------------------------------------------|------------------|---------|----------------------|
| 1     | Pd(P <sup>t</sup> Bu <sub>3</sub> ) <sub>2</sub> | DPE-Phos         | PhMe    | 15%                  |
| 2     | Pd <sub>2</sub> (dba) <sub>3</sub>               | DPE-Phos         | PhMe    | 9%                   |
| 3     | Pd(OAc) <sub>2</sub>                             | DPE-Phos         | PhMe    | 10%                  |
| 4     | Pd(acac) <sub>2</sub>                            | DPE-Phos         | PhMe    | ND                   |
| 5     | Pd(PPh <sub>3</sub> ) <sub>4</sub>               | DPE-Phos         | PhMe    | 10%                  |
| 6     | Pd(acac) <sub>2</sub>                            | PCy <sub>3</sub> | PhMe    | ND                   |
| 7     | Pd(P <sup>t</sup> Bu <sub>3</sub> ) <sub>2</sub> | DPE-Phos         | MeCN    | 12%                  |

|   |                                                  |          |      |    |
|---|--------------------------------------------------|----------|------|----|
| 8 | Pd(P <sup>t</sup> Bu <sub>3</sub> ) <sub>2</sub> | DPE-Phos | THF  | 7% |
| 9 | Pd(P <sup>t</sup> Bu <sub>3</sub> ) <sub>2</sub> | DPE-Phos | MeOH | ND |

**Table S13.** Screening for the catalyst and solvent

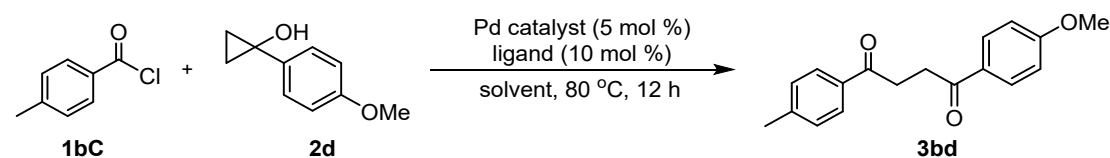

| Entry | catalyst                                         | ligand           | solvent | yield <sup>[b]</sup> |
|-------|--------------------------------------------------|------------------|---------|----------------------|
| 1     | Pd(P <sup>t</sup> Bu <sub>3</sub> ) <sub>2</sub> | X-Phos           | PhMe    | 14%                  |
| 2     | Pd(P <sup>t</sup> Bu <sub>3</sub> ) <sub>2</sub> | Dppbz            | PhMe    | ND                   |
| 3     | Pd(P <sup>t</sup> Bu <sub>3</sub> ) <sub>2</sub> | BINAP            | PhMe    | 10%                  |
| 4     | Pd(P <sup>t</sup> Bu <sub>3</sub> ) <sub>2</sub> | Dppm             | PhMe    | 15%                  |
| 5     | Pd(P <sup>t</sup> Bu <sub>3</sub> ) <sub>2</sub> | Dppe             | PhMe    | 13%                  |
| 6     | Pd(P <sup>t</sup> Bu <sub>3</sub> ) <sub>2</sub> | Dppf             | PhMe    | 19%                  |
| 7     | Pd(P <sup>t</sup> Bu <sub>3</sub> ) <sub>2</sub> | PPh <sub>3</sub> | PhMe    | 12%                  |
| 8     | Pd(P <sup>t</sup> Bu <sub>3</sub> ) <sub>2</sub> | PCy <sub>3</sub> | PhMe    | 6%                   |

**Table S14.** Screening for the additive

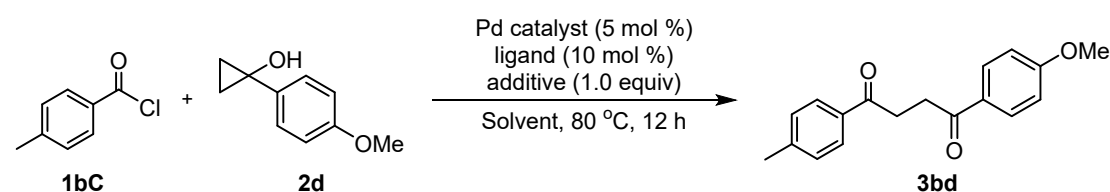

| Entry | catalyst                                         | ligand           | additive                       | solvent | T     | yield <sup>[b]</sup> |
|-------|--------------------------------------------------|------------------|--------------------------------|---------|-------|----------------------|
| 1     | Pd(PPh <sub>3</sub> ) <sub>4</sub>               | ---              | ---                            | THF     | RT    | ND                   |
| 2     | Pd(P <sup>t</sup> Bu <sub>3</sub> ) <sub>2</sub> | ---              | ---                            | PhMe    | 80 °C | ND                   |
| 3     | Pd(P <sup>t</sup> Bu <sub>3</sub> ) <sub>2</sub> | PPh <sub>3</sub> | Et <sub>3</sub> N              | PhMe    | 80 °C | 30%                  |
| 4     | Pd(P <sup>t</sup> Bu <sub>3</sub> ) <sub>2</sub> | PPh <sub>3</sub> | K <sub>2</sub> CO <sub>3</sub> | PhMe    | 80 °C | 35%                  |
| 5     | Pd(P <sup>t</sup> Bu <sub>3</sub> ) <sub>2</sub> | PPh <sub>3</sub> | KO <sup>t</sup> Bu             | PhMe    | 80 °C | ND                   |
| 6     | Pd(P <sup>t</sup> Bu <sub>3</sub> ) <sub>2</sub> | Dppf             | Et <sub>3</sub> N              | PhMe    | 80 °C | 40%                  |
| 7     | Pd(P <sup>t</sup> Bu <sub>3</sub> ) <sub>2</sub> | Dppf             | K <sub>2</sub> CO <sub>3</sub> | PhMe    | 80 °C | 36%                  |

|   |                                                  |      |                    |      |       |    |
|---|--------------------------------------------------|------|--------------------|------|-------|----|
| 8 | Pd(P <sup>t</sup> Bu <sub>3</sub> ) <sub>2</sub> | Dppf | KO <sup>t</sup> Bu | PhMe | 80 °C | ND |
|---|--------------------------------------------------|------|--------------------|------|-------|----|

Unless otherwise noted, all reactions were performed on 0.2 mmol acid chloride with 1.0 equiv of the cyclopropanol under nitrogen for 12 h.

### Kinetic competition experiment

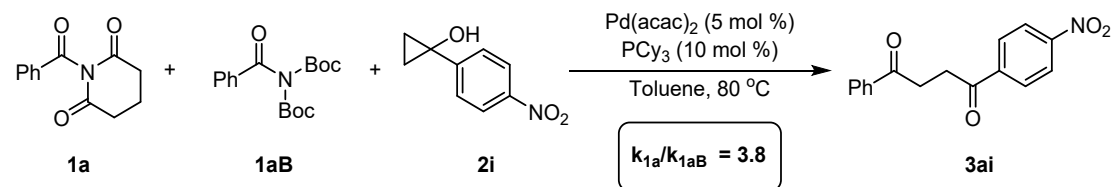

A 10 mL oven-dried reaction vessel equipped with a magnetic stir bar was charged with **1a** (0.1 mmol, 1.0 equiv, 21.7 mg), **1aB** (0.1 mmol, 1.0 equiv, 32.1 mg), **2i** (0.3 mmol, 3.0 equiv, 53.7 mg), and Pd(acac)<sub>2</sub> (0.005 mol, 0.05 equiv, 1.6 mg). The vessel was capped with a rubber septum and then transferred to the glove. PCy<sub>3</sub> (10 mol %, 0.01 mmol, 2.8 mg) then was added and removed from glove. The reaction mixture was resolved in toluene (1 mL) and allowed to stir at 80 °C for 1 h. The mixture was allowed to room temperature after 1 h, and filtered through celite, then concentrated under vacuum. The crude substrate-product mixture was purified by flash chromatography (Petroleum ether / Ethyl acetate = 5/1 then Petroleum ether/ Dichloromethane = 1:2) to give the substrates mixture (**1a** and **1aB**).

| Time | Concentration of <b>1a</b> | Concentration of <b>1aB</b> |
|------|----------------------------|-----------------------------|
| 0 h  | 0.1 mol/L                  | 0.1 mol/L                   |
| 1 h  | 0.06525 mol/L              | 0.08925 mol/L               |

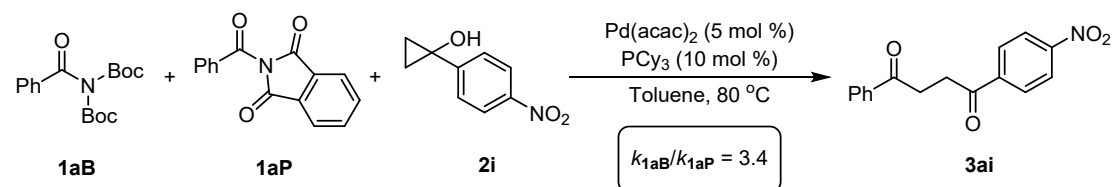

A 10 mL oven-dried reaction vessel equipped with a magnetic stir bar was charged with **1aP** (0.1 mmol, 1.0 equiv, 25.1 mg), **1aB** (0.1 mmol, 1.0 equiv, 32.1 mg), **2i** (0.3 mmol, 3.0 equiv, 53.7 mg), and Pd(acac)<sub>2</sub> (0.005 mol, 0.05 equiv, 1.6 mg). The vessel was capped with a rubber septum and then transferred to the glove. PCy<sub>3</sub> (10 mol %, 0.01 mmol, 2.8 mg) then was added and removed from glove. The reaction mixture was resolved in toluene (1 mL) and allowed to stir at 80 °C for 1 h. The mixture was allowed to room temperature after 1 h, and filtered through celite, then concentrated under vacuum. The crude substrate-product mixture was purified by flash chromatography (Petroleum ether / Ethyl acetate = 5/1 then Petroleum ether/ Dichloromethane = 1:2) to give the substrates mixture (**1aB** and **1aP**).

| Time | Concentration of <b>1aB</b> | Concentration of <b>1aP</b> |
|------|-----------------------------|-----------------------------|
| 0 h  | 0.1 mol/L                   | 0.1 mol/L                   |
| 1 h  | 0.087 mol/L                 | 0.096 mol/L                 |

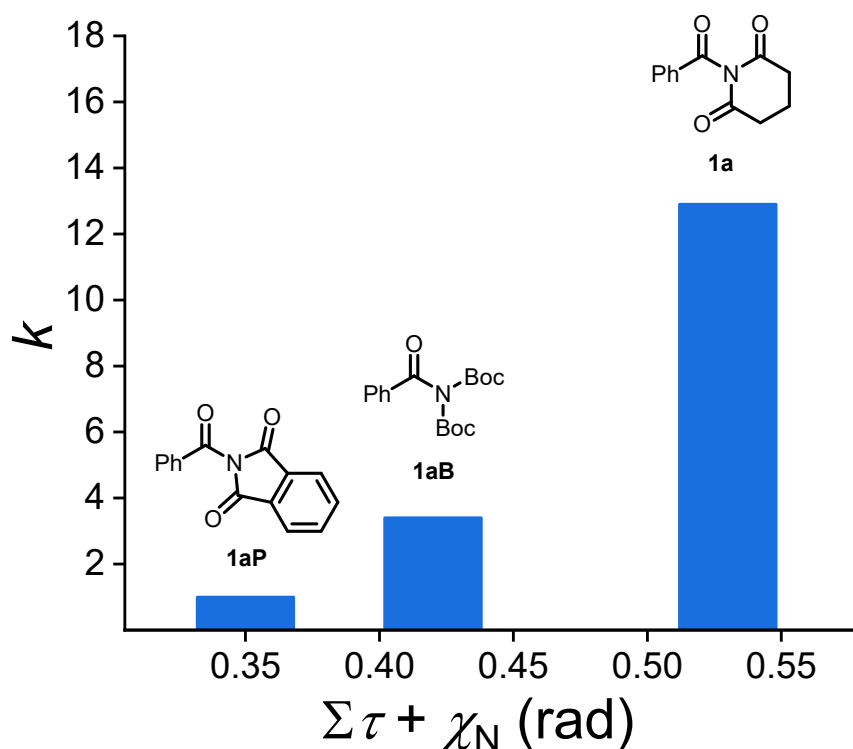

**Figure S7.** Relative reactivity versus the additive parameter of the three amides

#### Reactivity order chemistry set

{(1a, R, P,  $k_{1a}$ -12.9, EC),

(1aB, R, P,  $k_{1aB}$ -3.4, EC),

(1aP, R, P,  $k_{1aP}$ -1, EC)},

where R = 2i, P = 3ai,

EC = Pd(acac)<sub>2</sub> (5 mol %)/PCy<sub>3</sub> (10 mol %)/Toluene/80 °C/1 h

#### Reduction of $\gamma$ -diketones to alkane

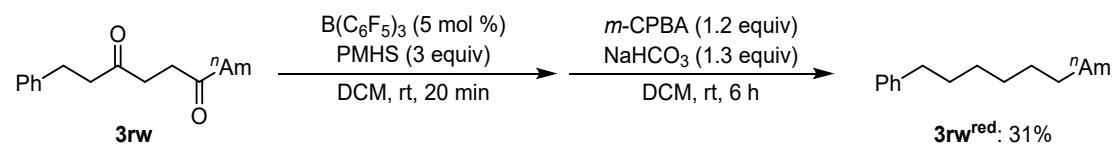

According to the literature reported,<sup>34</sup> to a solution of 1, 4 - diketones compound **3rw** (0.2 mmol, 1.0 equiv, 52 mg) in dry CH<sub>2</sub>Cl<sub>2</sub> (2 mL) and tris (pentafluoro phenyl) borane (5 mol %, 0.01 mmol, 5.1 mg) was slowly added polymethylhydrosiloxane (0.6 mmol, 3 equiv, 134 mg, 133  $\mu$ L) at room temperature. After 20 min, a vigorous effervescence (like foam) was observed. At this point, the reaction mixture was dissolved in hexane and filtered through a silica gel pad using hexane. Evaporation of the solvents afforded the product in crude form (alkane and alkene product presumably). To eliminate alkene product and acquire pure alkane product, we converted alkene product to epoxides according to the literature.<sup>35</sup> To a 10 mL dried test tube was added alkene -

alkane crude product (1.0 equiv, 0.2 mmol), NaHCO<sub>3</sub> (1.3 equiv, 0.26 mmol, 21.8 mg) and CH<sub>2</sub>Cl<sub>2</sub> (1 mL) under N<sub>2</sub> atmosphere. The test tube was then added *m*-CPBA (1.2 equiv, 0.24 mmol, 41.4 mg) dissolved in CH<sub>2</sub>Cl<sub>2</sub> (1 mL) dropwise at 0 °C. The reaction was then stirred for an additional 1 h and then allowed to warm to room temperature. After completion of the reaction (TLC monitoring), the reaction mixture is quenched with aqueous Na<sub>2</sub>S<sub>2</sub>O<sub>4</sub>, and the aqueous phase is extracted with CH<sub>2</sub>Cl<sub>2</sub>. The combined organic layers are washed successively with a saturated solution of NaHCO<sub>3</sub> and brine and dried over Na<sub>2</sub>SO<sub>4</sub>. The filtrate was concentrated under reduced pressure and the crude product was purified by silica gel column chromatography (eluent: n-hexane) afforded the corresponding alkane product (**3rwR**) with 31% yields (14.3 mg) as colorless liquid. <sup>1</sup>H NMR (500 MHz, Chloroform-*d*) δ 7.31 – 7.26 (m, 2H), 7.21 – 7.15 (m, 3H), 2.61 (t, *J* = 8.0 Hz, 2H), 1.66 – 1.59 (m, 2H), 1.36 – 1.25 (m, 16H), 0.89 (t, *J* = 7.0 Hz, 3H). <sup>13</sup>C NMR (126 MHz, Chloroform-*d*) δ 142.96, 128.38, 128.19, 125.51, 35.99, 31.92, 31.53, 29.67, 29.63, 29.60, 29.52, 29.35, 22.69, 14.12. The spectroscopic data of product (**3rwR**) matched literature values.<sup>36</sup>

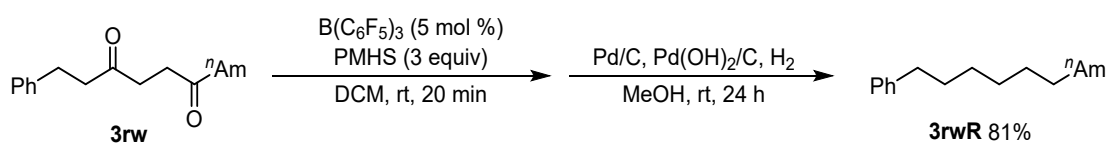

Crude alkane and alkene product was obtained according to the procedure in 0.2 mmol scale, the crude product was mixed with MeOH (2 mL), Pd(OH)<sub>2</sub>/C (15 mg), and Pd/C (15 mg) and the suspension was kept under H<sub>2</sub> atmosphere for 24 h at room temperature. Filtration through a Celite pad followed by evaporation and chromatography on silica gel (eluent: n-hexane) afforded the products (**3rwR**) with 81% yields (37.8 mg) as colorless liquid. <sup>1</sup>H NMR (500 MHz, Chloroform-*d*) δ 7.31 – 7.26 (m, 2H), 7.22 – 7.16 (m, 3H), 2.62 (t, *J* = 8.0 Hz, 2H), 1.67 – 1.59 (m, 2H), 1.36 – 1.26 (m, 16H), 0.90 (t, *J* = 7.0 Hz, 3H). <sup>13</sup>C NMR (126 MHz, Chloroform-*d*) δ 142.95, 128.38, 128.19, 125.51, 36.00, 31.92, 31.53, 29.67, 29.64, 29.60, 29.53, 29.35, 22.69, 14.12.

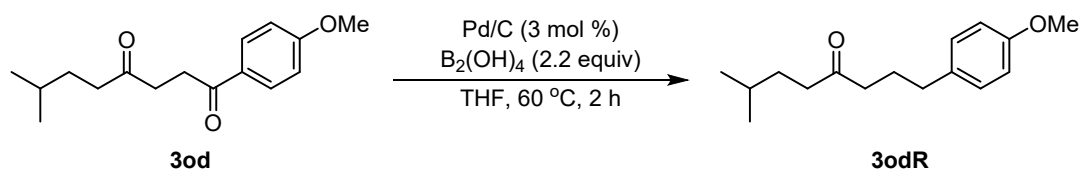

According to the literature reported<sup>37</sup>, Reactions were carried out on 0.2 mmol scale. A 10 mL reaction vessel equipped with a magnetic stir bar was charged with 12 mg of 5 weight % of Pd/C (3 mol%), 39.4 mg of tetrahydroxydiboron (2.2 equiv), and 52 mg of the diketones **3od** (0.2 mmol) in 2 mL THF, then the reaction mixture was stirred at 60 °C for 2 h. The crude mixture was passed through Celite plug rinsing the reaction vial with DCM; the eluent was removed by rotary evaporation, followed by flash column chromatography (Petroleum ether / Ethyl acetate = 10/1) to afford the product (**3odR**) with 67% yields (33.1 mg) as colorless liquid. <sup>1</sup>H NMR (500 MHz, Chloroform-*d*) δ 7.10 – 7.06 (m, 2H), 6.84 – 6.80 (m, 2H), 3.78 (s, 3H), 2.55 (t, *J* = 7.5 Hz, 2H), 2.38 (dt, *J* = 19.5, 7.5 Hz, 4H), 1.87 (p, *J* = 7.5 Hz, 2H), 1.56 – 1.47 (m, 1H), 1.47 – 1.41 (m, 2H), 0.87 (d, *J* = 6.5 Hz, 6H). <sup>13</sup>C NMR (126 MHz, Chloroform-*d*) δ 211.32, 157.79, 133.66, 129.29, 113.72, 55.19, 41.79, 40.84, 34.16, 32.58, 27.66, 25.46, 22.29. HRMS (ESI) *m/z* calcd. for C<sub>19</sub>H<sub>18</sub>O<sub>2</sub> [M+H]<sup>+</sup> 249.1849, found 249.1842.

## Reference

1. L. R. Mills, C. Zhou, E. Fung and S. A. L. Rousseaux, *Org. Lett.*, 2019, **21**, 8805-8809.
2. C. Dorval, O. Stetsiuk, S. Gaillard, E. Dubois, C. Gosmini and G. Danoun, *Org. Lett.*, 2022, **24**, 2778-2782.
3. J. Yang, Q. Sun and N. Yoshikai, *ACS Catal.*, 2019, **9**, 1973-1978.
4. K. Nomura and S. Matsubara, *Asian J. Chem.*, 2010, **5**, 147-152.
5. M. Ji, Z. Wu and C. Zhu, *Chem. Comm.*, 2019, **55**, 2368-2371.
6. R. M. Rivera, Y. Jang, C. M. Poteat and V. N. G. Lindsay, *Org. Lett.*, 2020, **22**, 6510-6515.
7. J. Liu, E. Xu, J.-Y. Jiang, Z. Huang, L.-Y. Zheng and Z.-Q. Liu, *Chem. Comm.*, 2020, **56**, 2202-2205.
8. W. Srimontree, A. Chatupheeraphat, H.-H. Liao and M. Rueping, *Organic Letters*, 2017, **19**, 3091-3094.
9. F.-S. Bie, X.-J. Liu, H. Cao, Y.-J. Shi, T.-L. Zhou, M. Szostak and C.-W. Liu, *Org. Lett.*, 2021, **23**, 8098-8103.
10. L. Fang, S. Fan, W. Wu, T. Li and J. Zhu, *Chem. Commu.*, 2021, **57**, 7386-7389.
11. P. Gao, M. M. Rahman, A. Zamalloa, J. Feliciano and M. Szostak, *J. Org. Chem.*, 2022, DOI: 10.1021/acs.joc.2c01094.
12. Y. Dong, R. Li, J. Zhou and Z. Sun, *Org. Lett.*, 2021, **23**, 6387-6390.
13. H. Yin, D. U. Nielsen, M. K. Johansen, A. T. Lindhardt and T. Skrydstrup, *ACS Catal.*, 2016, **6**, 2982-2987.
14. L. Xu, X. Liu, G. R. Alvey, A. Shatskiy, J.-Q. Liu, M. D. Kärkäs and X.-S. Wang, *Org. Lett.*, 2022, **24**, 4513-4518.
15. T. Fujimura, S. Aoki and E. Nakamura, *J. Org. Chem.*, 1991, **56**, 2809-2821.
16. C. C. Derek, R. S. Joseph, C. Rajiv, C. Rebecca, W. E. John, Y. F. Kristi, L. H. Boyd, H. Yun, J. Steve, D. J. Lee, J. Guixian, A. L. Peter, S. M. Michael, S. M. Eric, J. M. William, O. D. Mary-Margaret, M. O. Andrea, J. R. Albert, S. Kristine, W. JunJun, W. Eric and B. Jonathan, *Bioorganic Med. Chem. Lett.*, 2008, **18**, 1063-1066.
17. V. Selvamurugan and I. S. Aidhen, *Tetrahedron*, 2001, **57**, 6065-6069.
18. L.-H. Wang and J. Zhao, *Eur. J. Org. Chem.*, 2018, **2018**, 4345-4348.
19. L. Debien, B. Quiclet-Sire and S. Z. Zard, *Org. Lett.*, 2011, **13**, 5676-5679.
20. R. Ilhyong, I. Masanobu, S. Noboru, Y. Shin-ya, Y. Go-hei and K. Mitsuo, *Tetrahedron Lett.*, 2002, **43**, 1257-1259.
21. D. Yu, W.-P. To, G. S. M. Tong, L.-L. Wu, K.-T. Chan, L. Du, D. L. Phillips, Y. Liu and C.-M. Che, *Chem. Sci.*, 2020, **11**, 6370-6382.
22. Q. Liu, R.-G. Wang, H.-J. Song, Y.-X. Liu and Q.-M. Wang, *Adv. Synth. Catal.*, 2020, **362**, 4391-4396.
23. C. Che, Z.-S. Qian, M.-C. Wu, Y. Zhao and G.-G. Zhu, *J. Org. Chem.*, 2018, **83**, 5665-5673.
24. I. Y. Ajibola, L. Ai and B. Li, *ChemistrySelect*, 2021, **6**, 9559-9564.
25. M. Egbertson and S. J. Danishefsky, *J. Org. Chem.*, 1989, **54**, 11-12.
26. Y.-X. Zhang, X.-T. Li, L.-M. Xu, X.-M. Xie, Y. Lu and Z.-G. Zhang, *Org. Lett.*, 2022, **24**, 7512-7516.
27. S. Kortet, A. Claraz and P. M. Pihko, *Org. Lett.*, 2020, **22**, 3010-3013.
28. T. Amaya, Y. Maegawa, T. Masuda, Y. Osafune and T. Hirao, *J. Am. Chem. Soc.*, 2015, **137**, 10072-10075.

29. F. Behler, F. Habecker, W. Saak, T. Klüner and J. Christoffers, *Eur. J. Org. Chem.*, 2011, **2011**, 4231-4240.
30. Y. Luo, Q. Wei, L.-K. Yang, Y.-Q. Zhou, W.-D. Cao, Z.-S. Su, X.-H. Liu and X.-M. Feng, *ACS Catal.*, 2022, **12**, 12984-12992.
31. K. Tanaka, T. Shoji and M. Hirano, *Eur. J. Org. Chem.*, 2007, **2007**, 2687-2699.
32. J. C. Lorenz, J. Long, Z.-Q. Yang, S. Xue, Y.-N. Xie and Y.-A. Shi, *J. Org. Chem.*, 2004, **69**, 327-334.
33. T. Avullala, P. Asgari, Y. Hua, A. Bokka, S. G. Ridlen, K. Yum, H. V. R. Dias and J. Jeon, *ACS Catal.*, 2019, **9**, 402-408.
34. S. Chandrasekhar, C. R. Reddy and B. N. Babu, *J. Org. Chem.*, 2002, **67**, 9080-9082.
35. W. Liu, T. Leischner, W. Li, K. Junge and M. Beller, *Angew. Chem. Int. Ed.*, 2020, **59**, 11321-11324.
36. F. Zhou, J. Zhu, Y. Zhang and S. Zhu, *Angew. Chem. Int. Ed.*, 2018, **57**, 4058-4062.
37. W. C. Spaller, J. Q. Lu and B. J. Stokes, *Adv. Synth. Catal.*, 2022, **364**, 2571-2575.

## NMR spectra

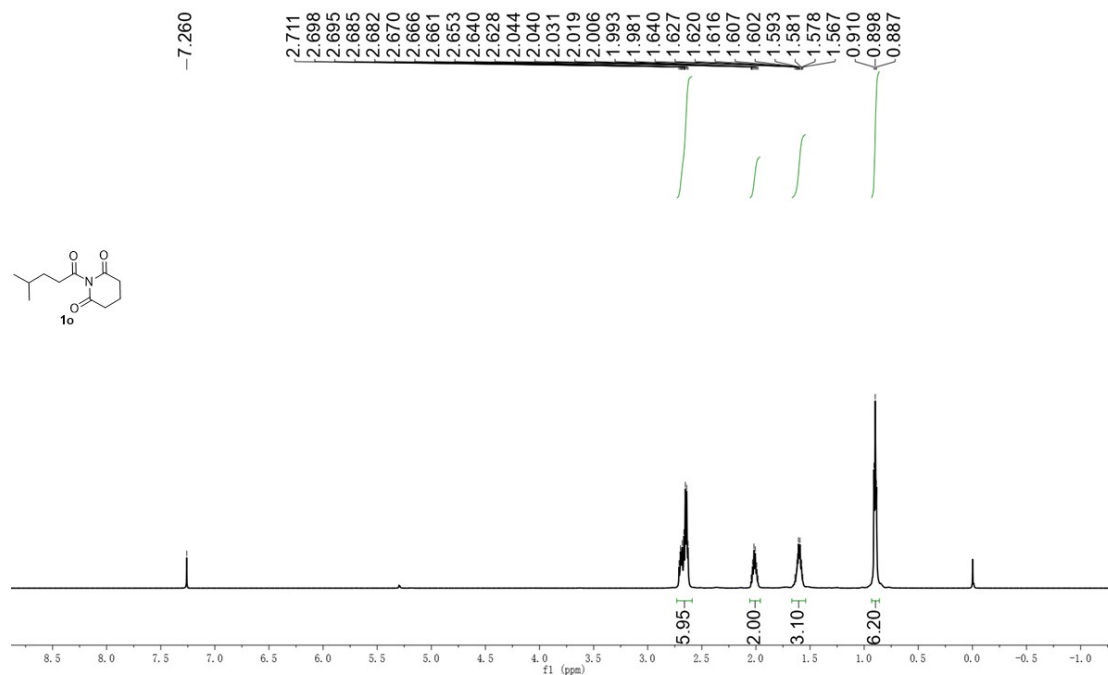



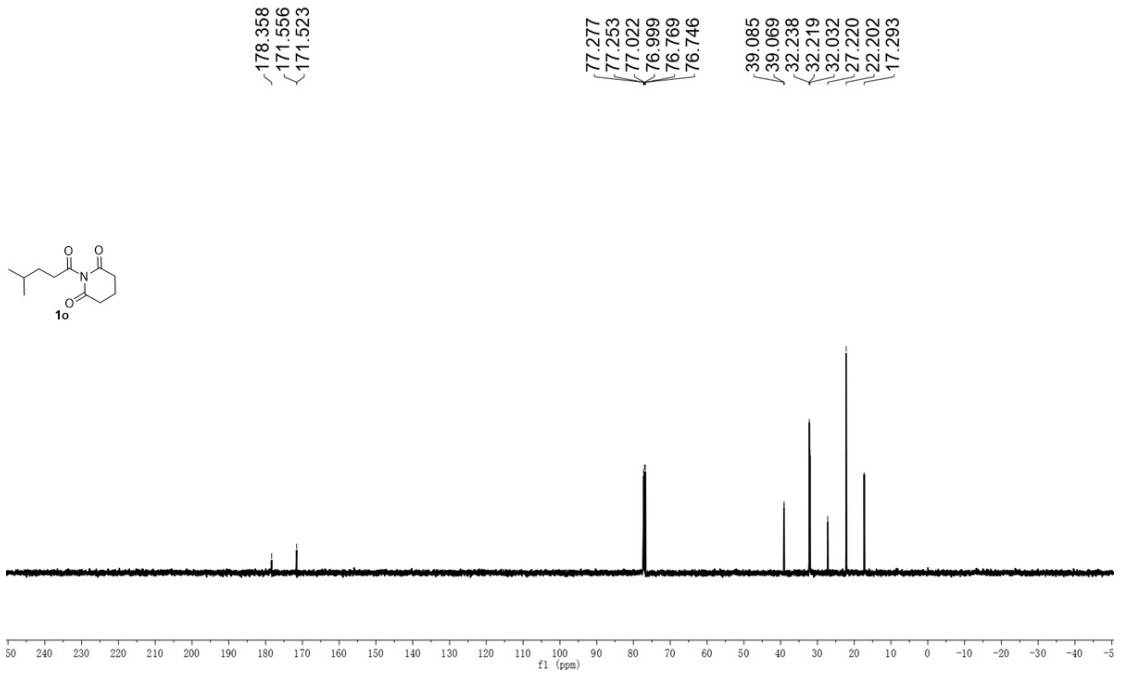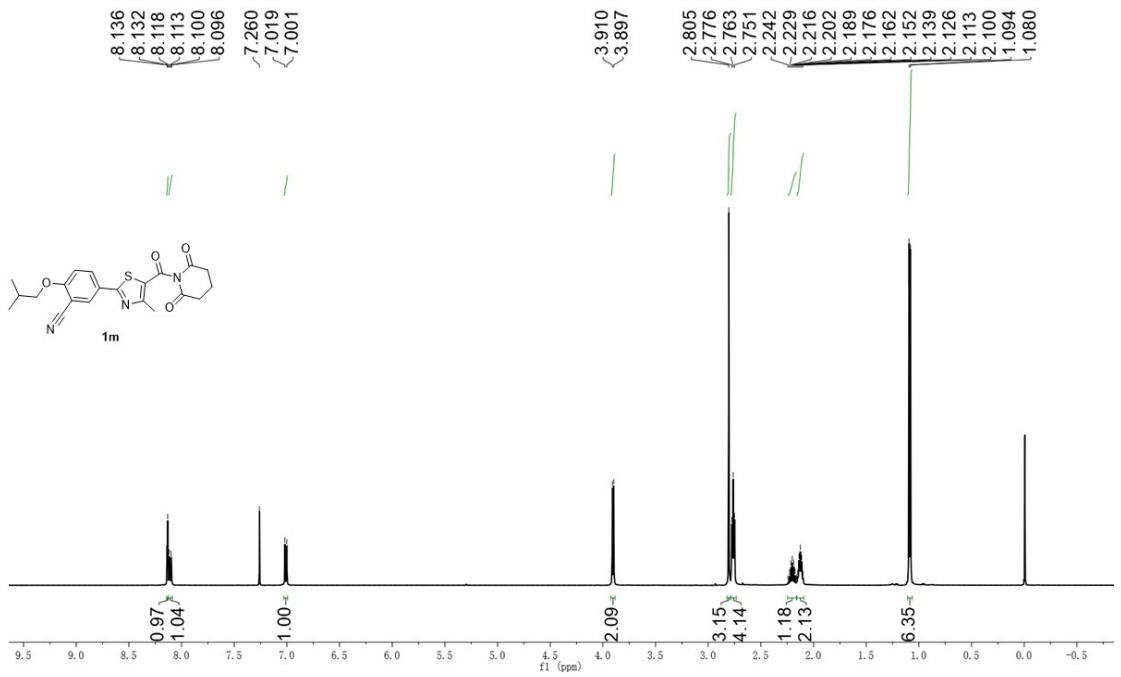

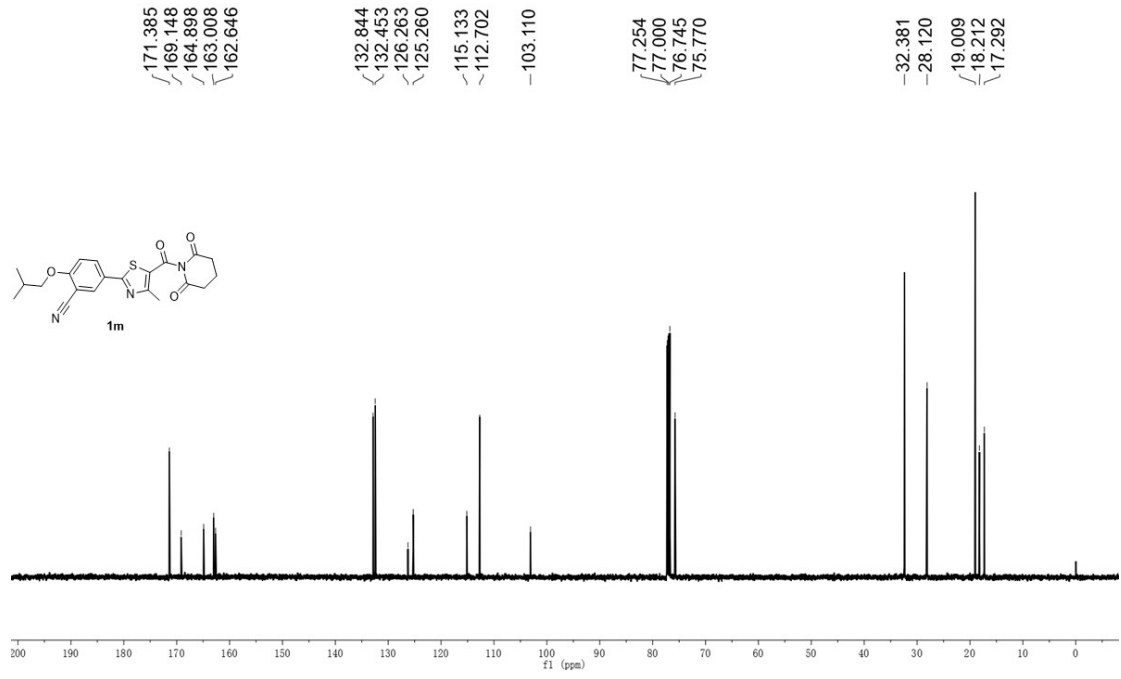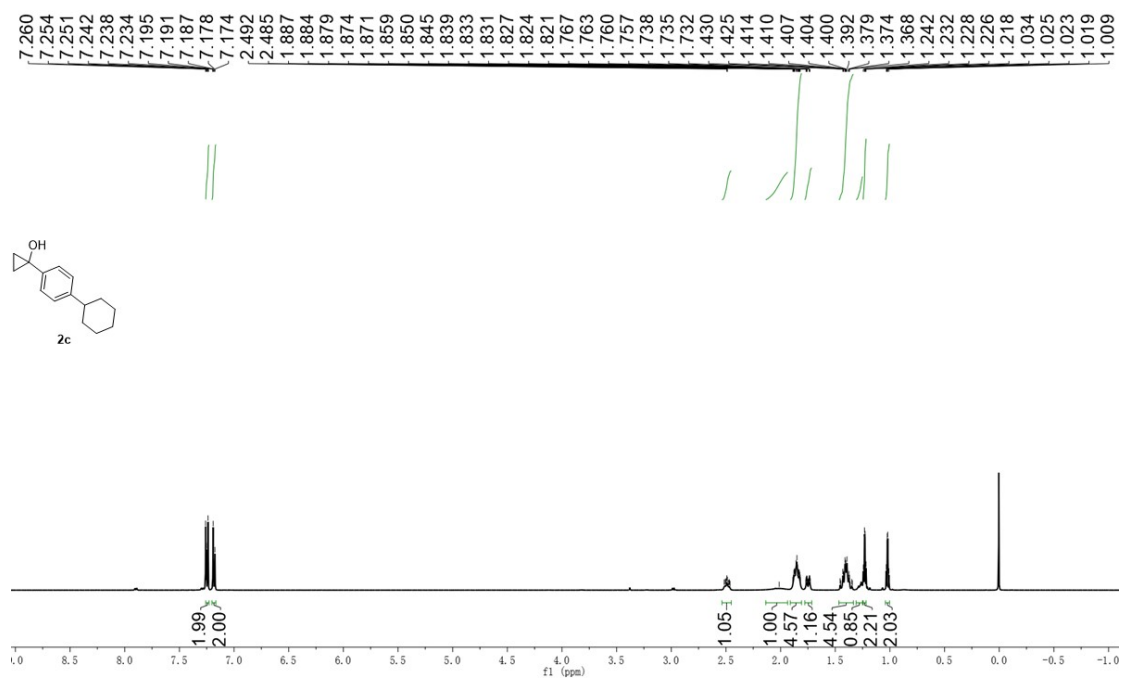

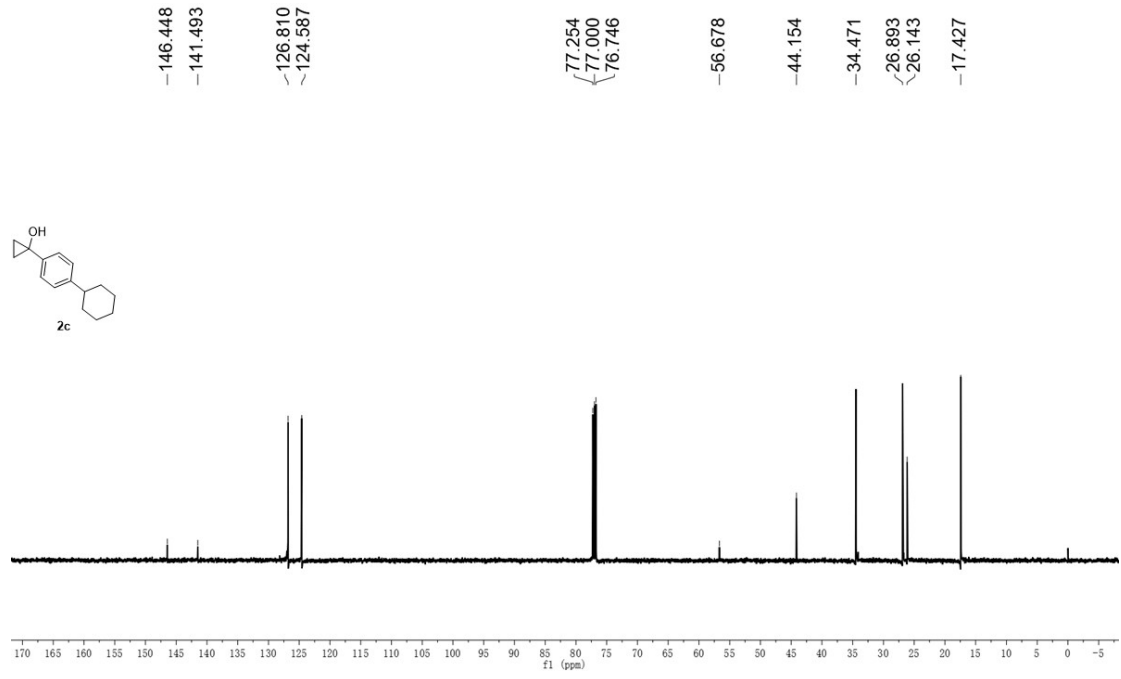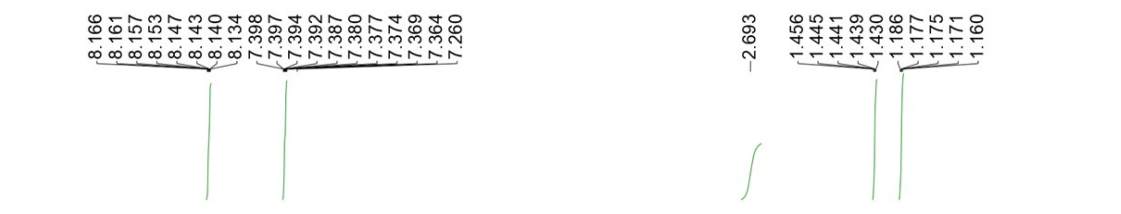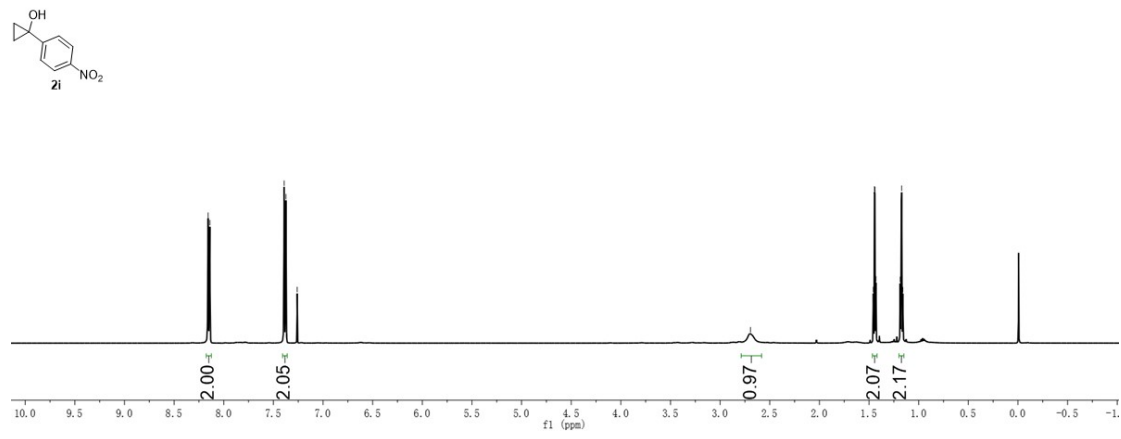

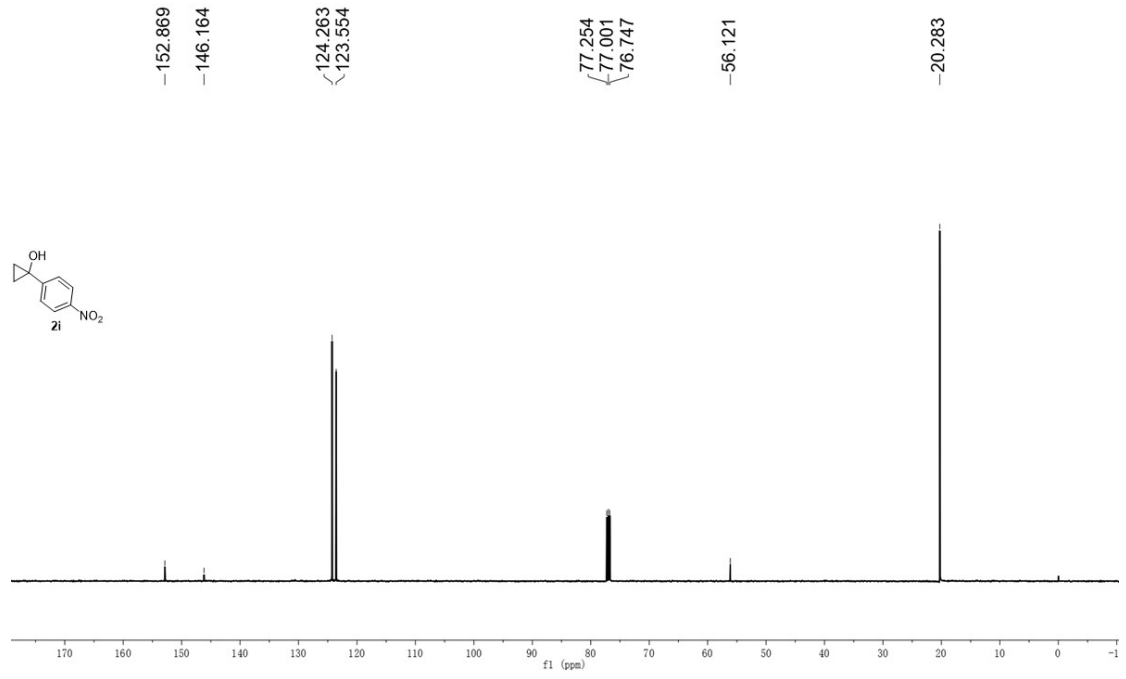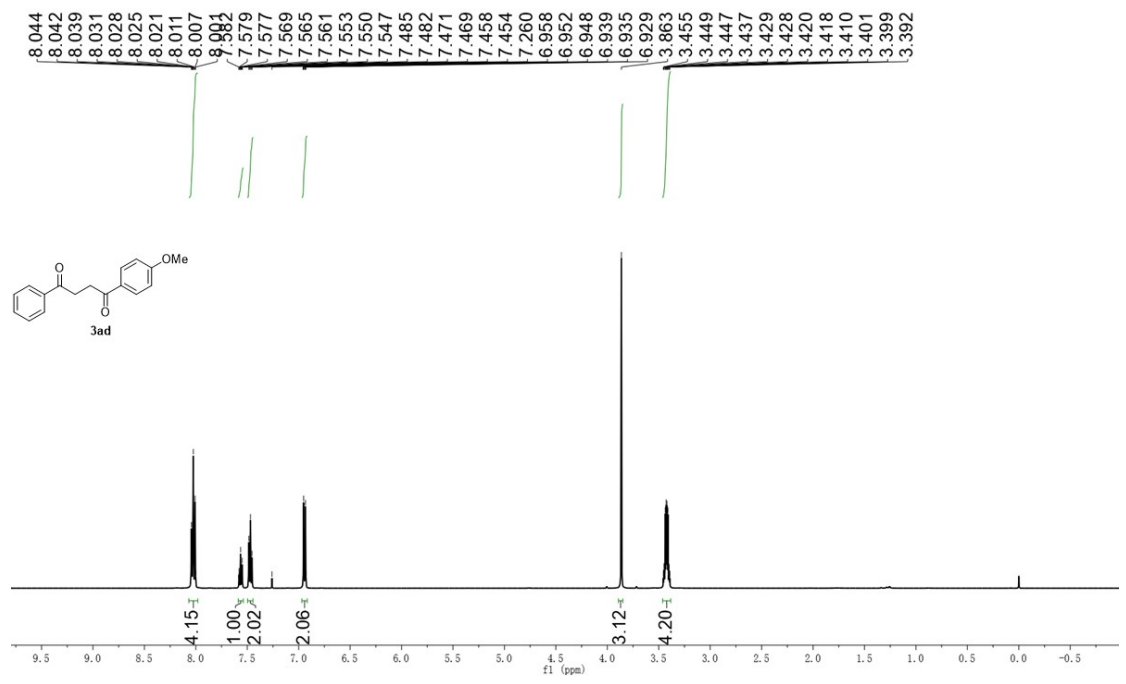

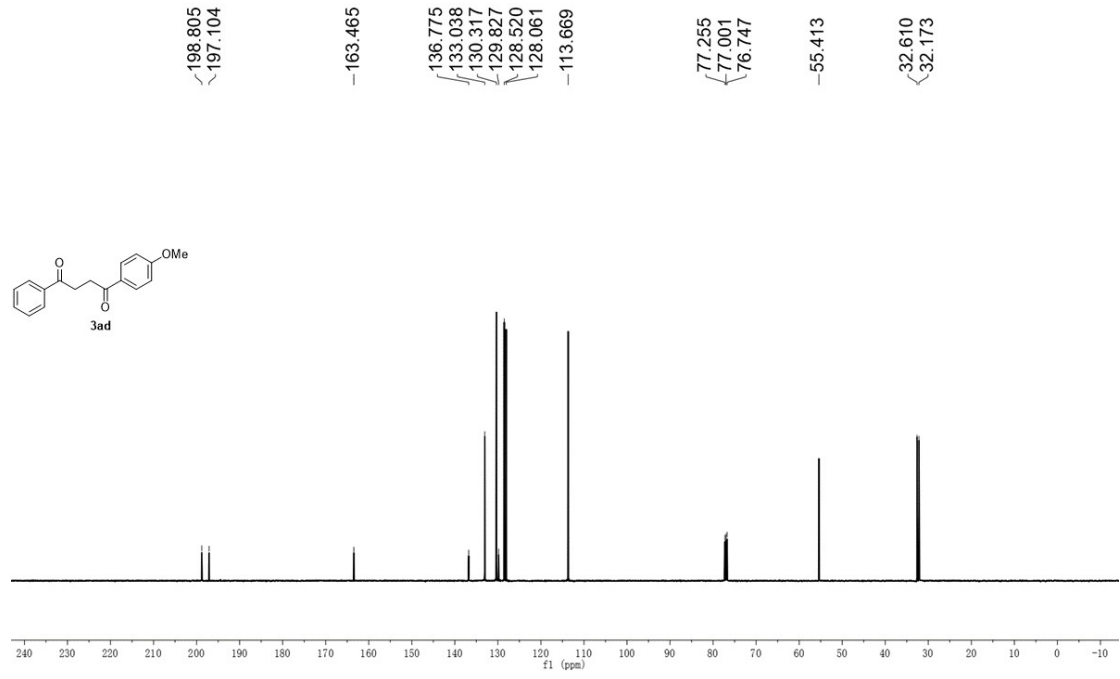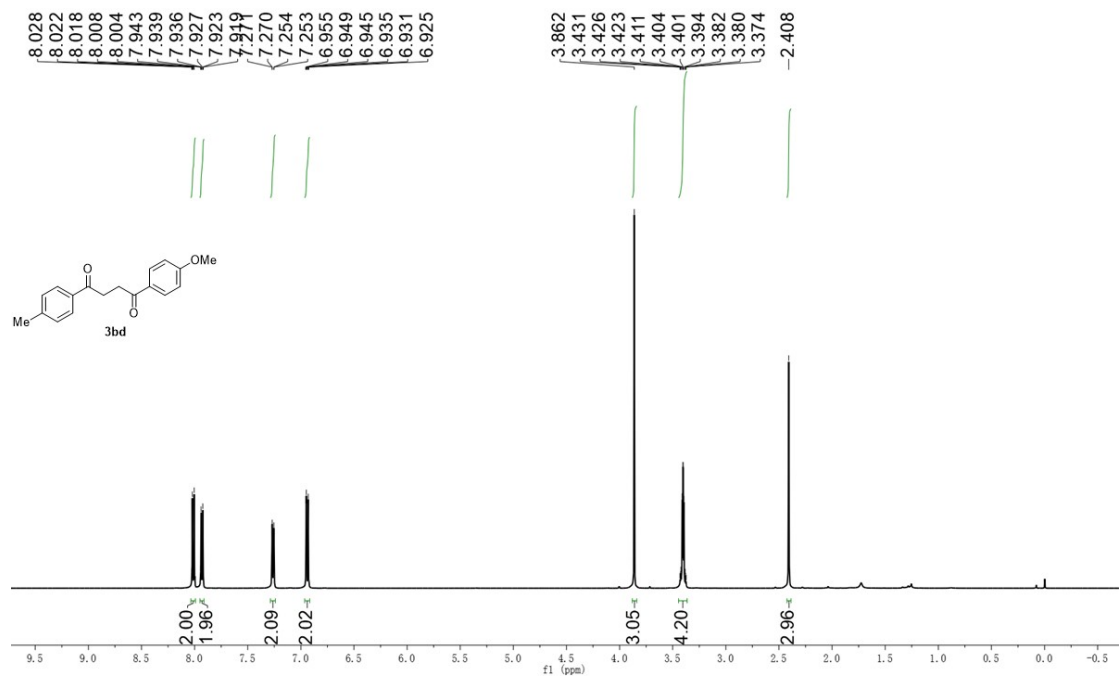

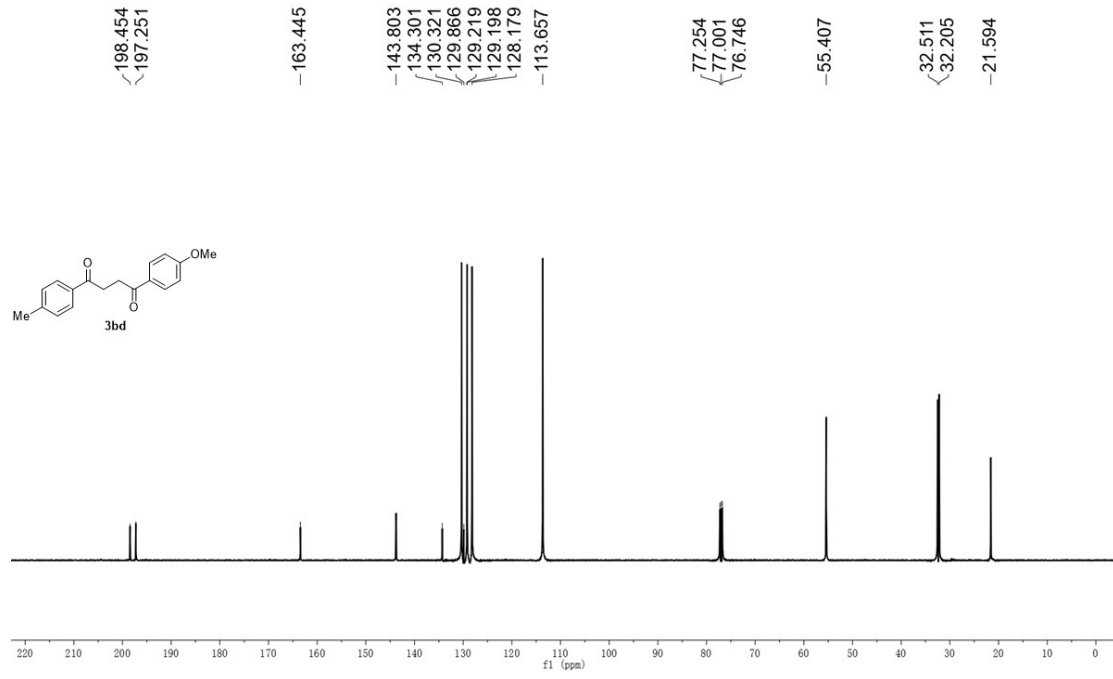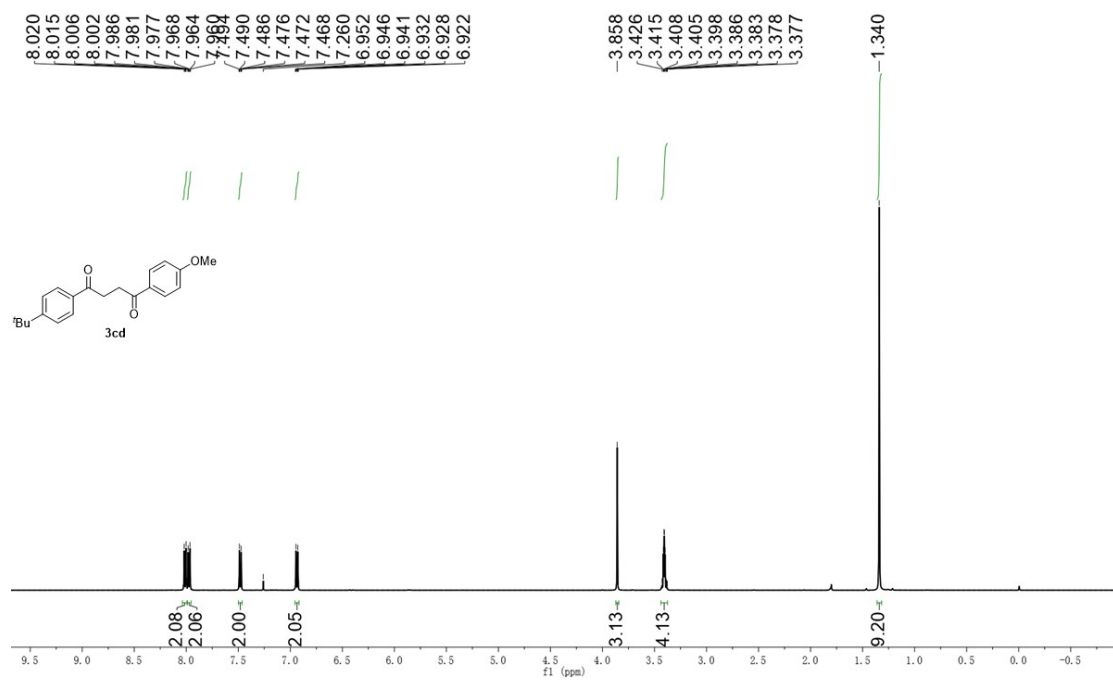

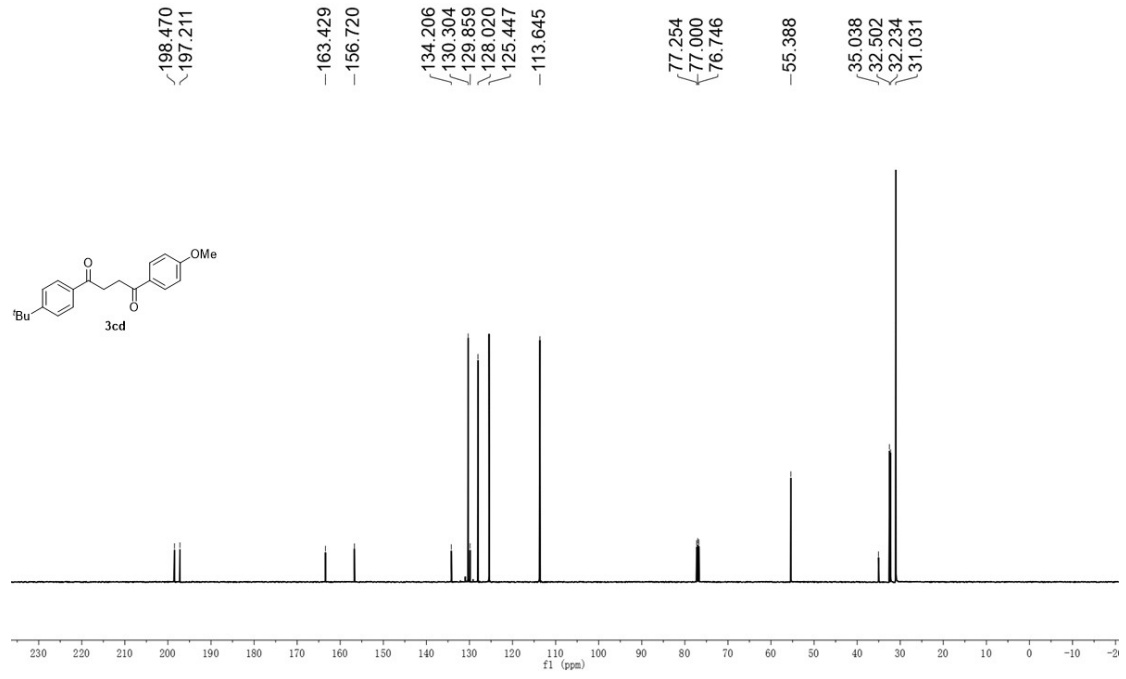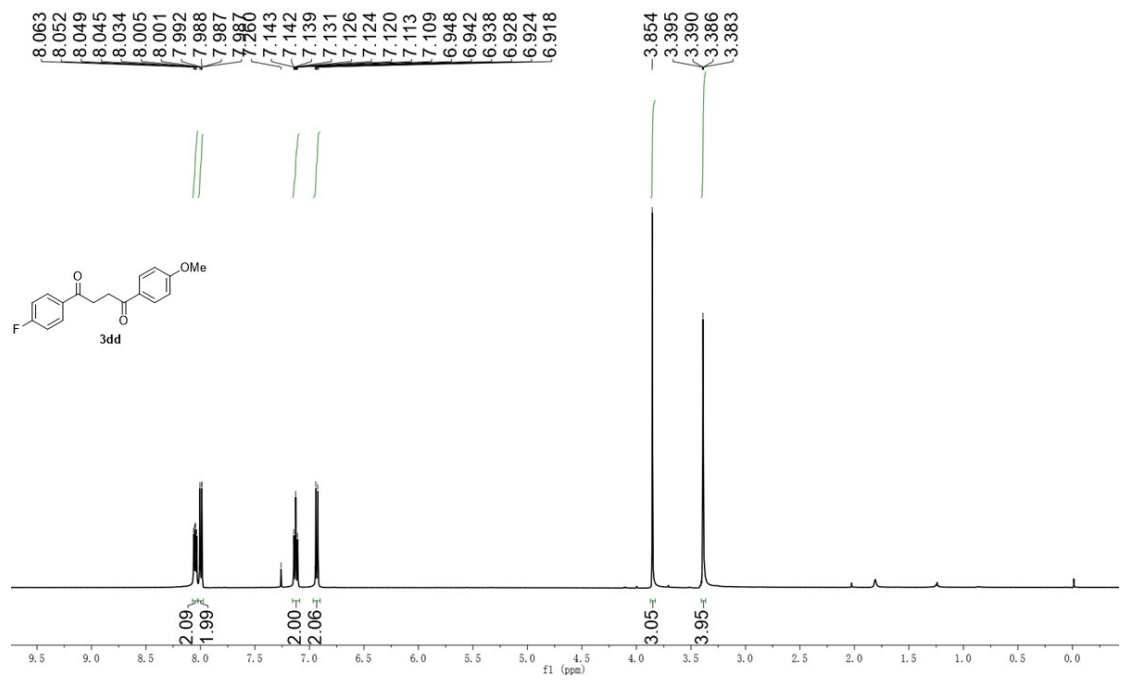

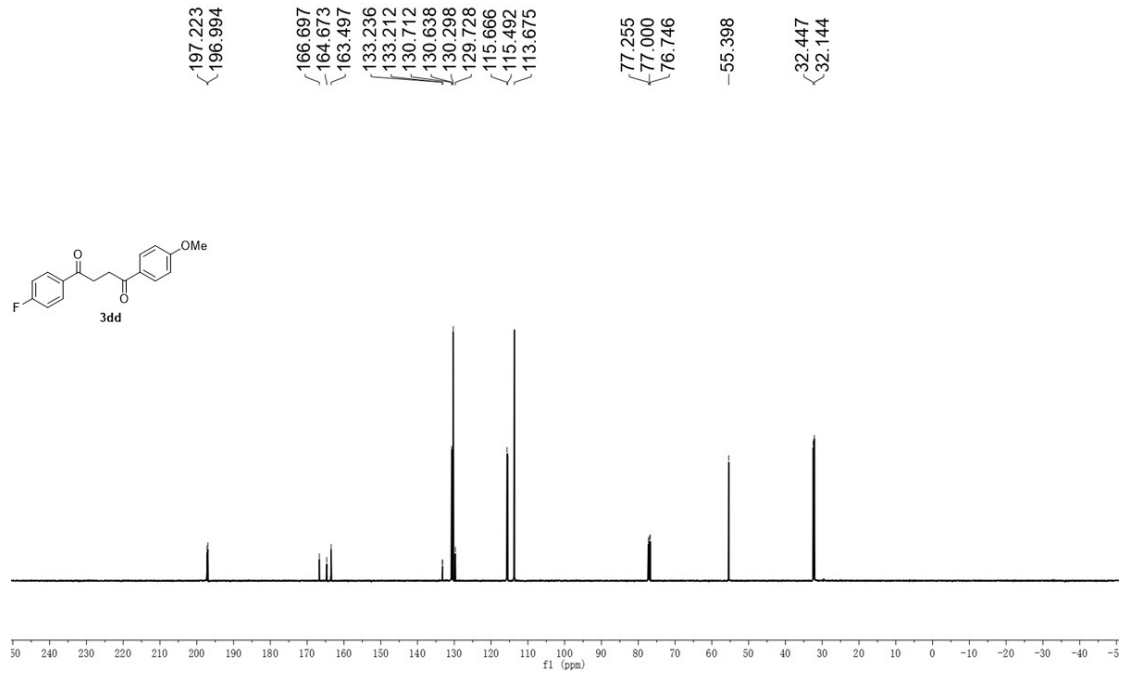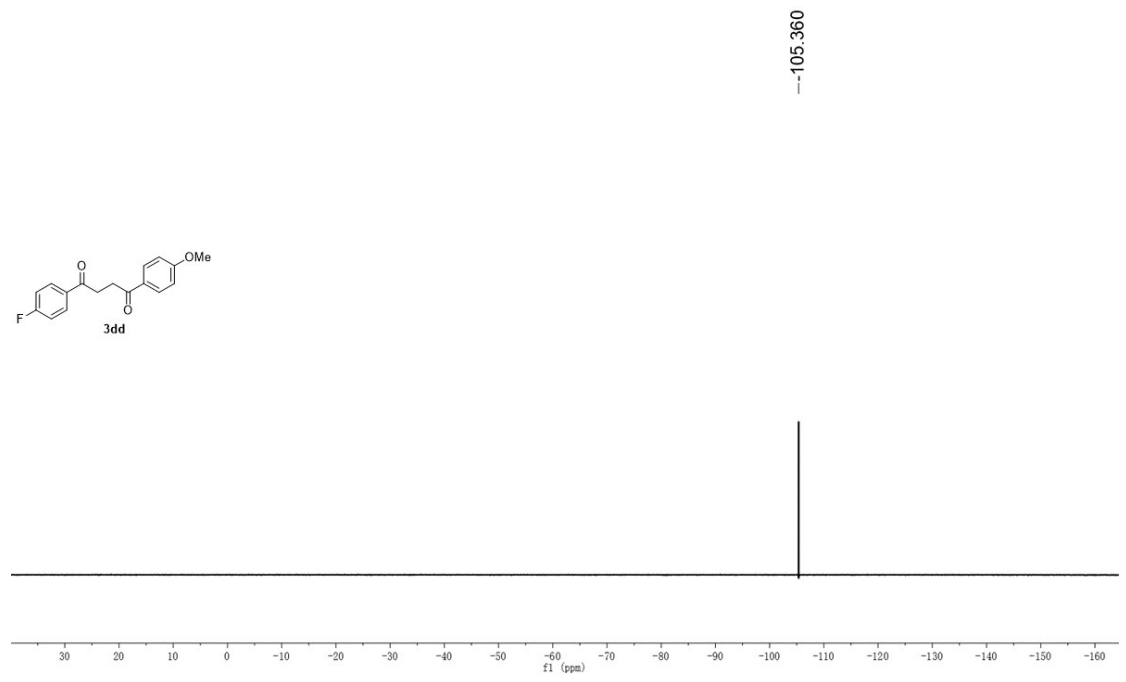



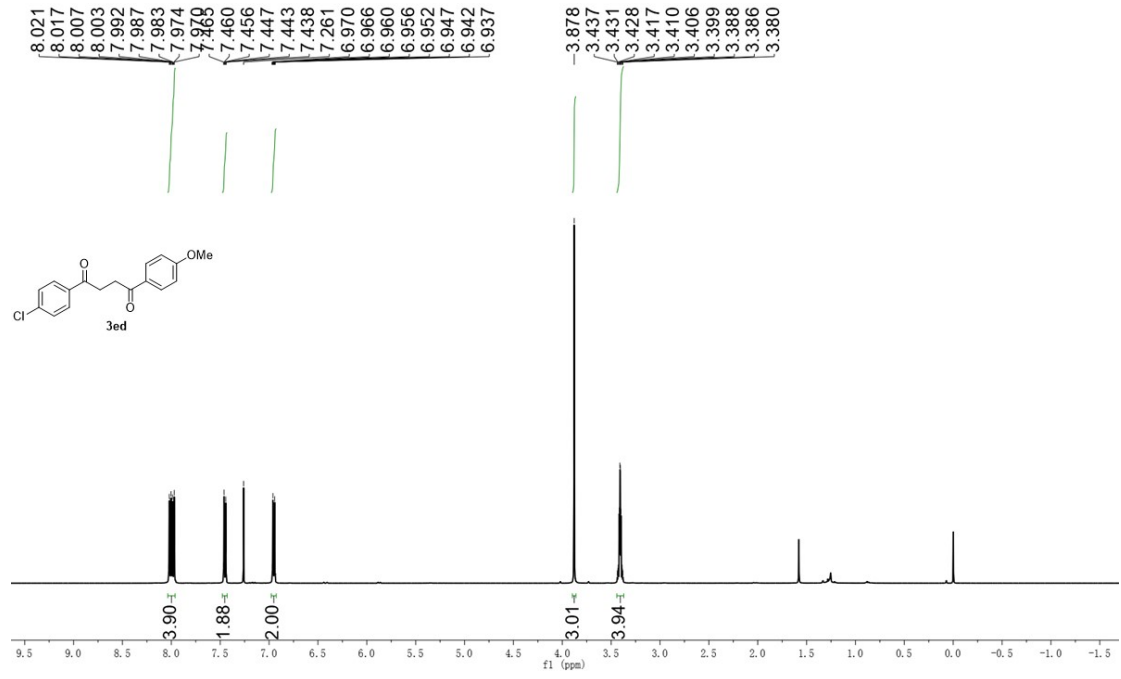

- 197.690
- 196.970
- 163.577
- 139.515
- 135.159
- 130.365
- 129.759
- 129.538
- 128.886
- 113.739
- 77.254
- 77.001
- 76.747
- 55.468
- 32.576
- 32.190

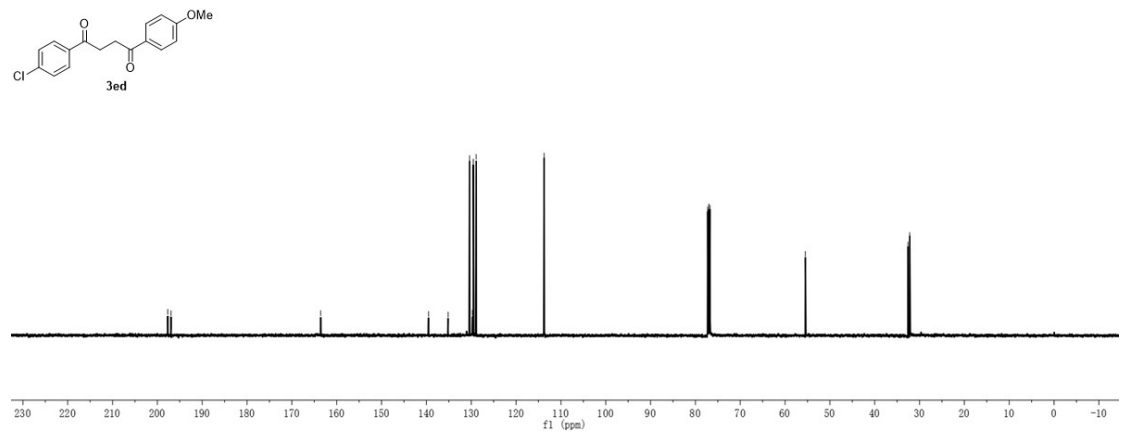

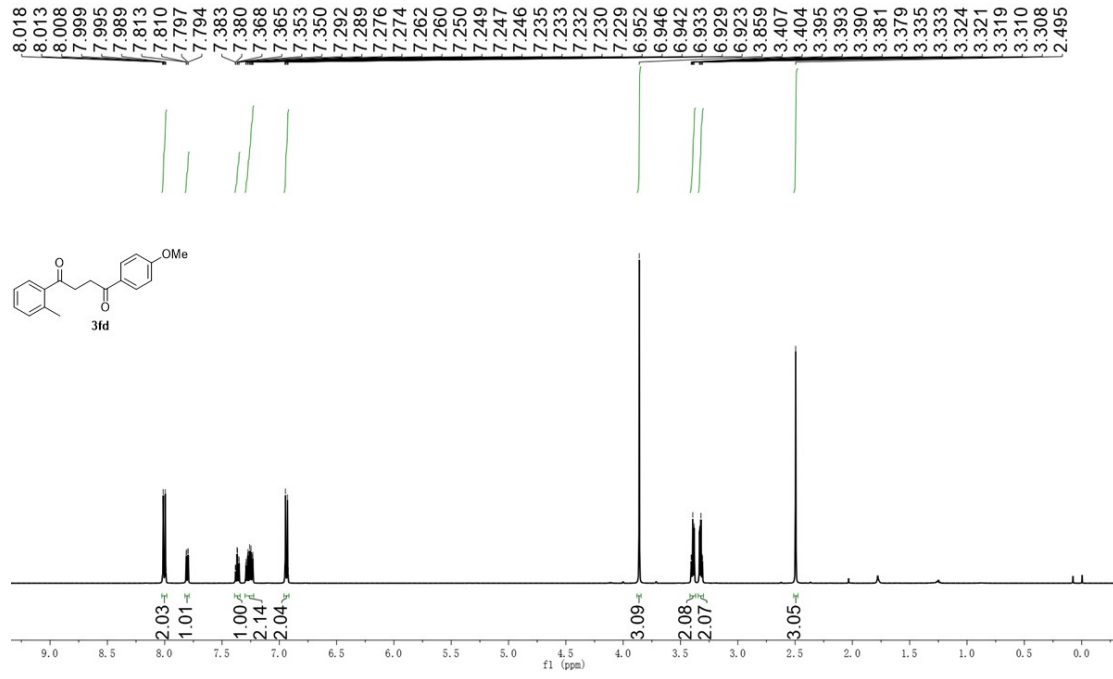

- 202.806
- 197.047
- 163.444
- 137.954
- 137.876
- 131.786
- 131.182
- 130.280
- 129.819
- 128.530
- 125.629
- 113.653
- 77.254
- 77.000
- 76.745
- 55.399
- 35.345
- 32.434
- 21.189

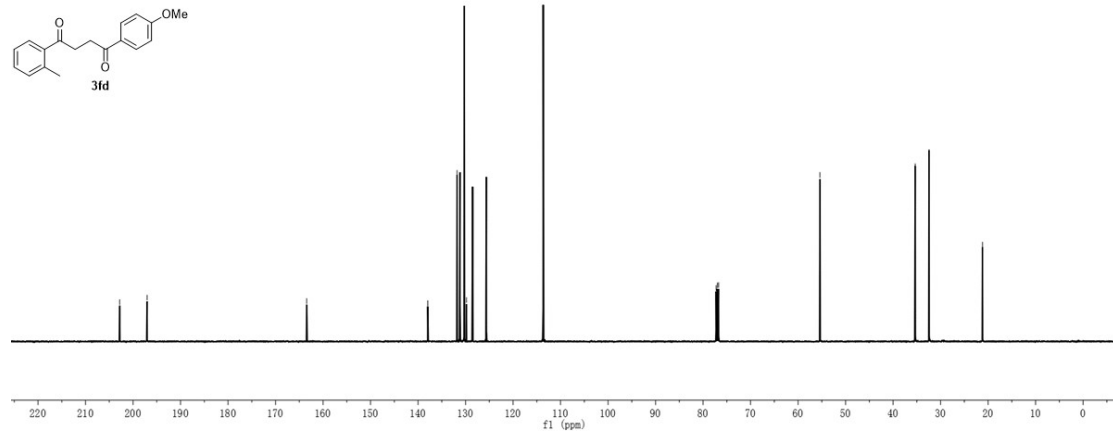

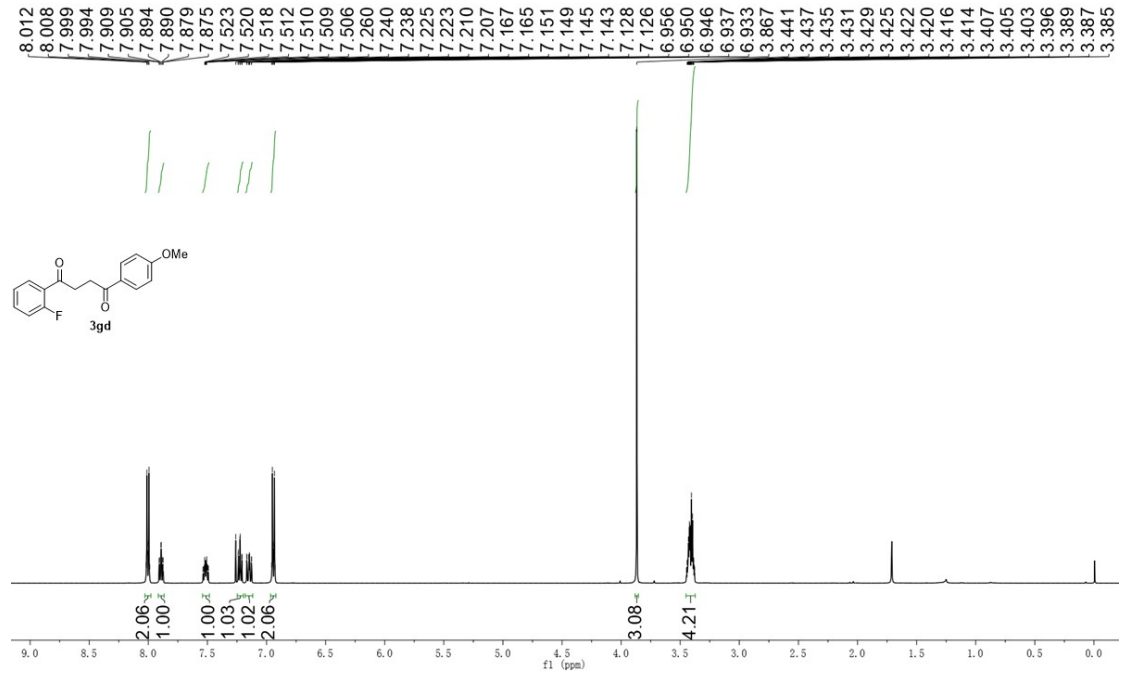

- Chemical shifts (ppm): 197.158, 197.125, 196.943, 163.459, 163.061, 161.037, 134.507, 134.435, 130.652, 130.630, 130.322, 129.847, 124.374, 124.347, 116.737, 116.549, 113.672, 77.255, 77.000, 76.746, -55.428, 37.468, 37.404, 32.192, 32.174.

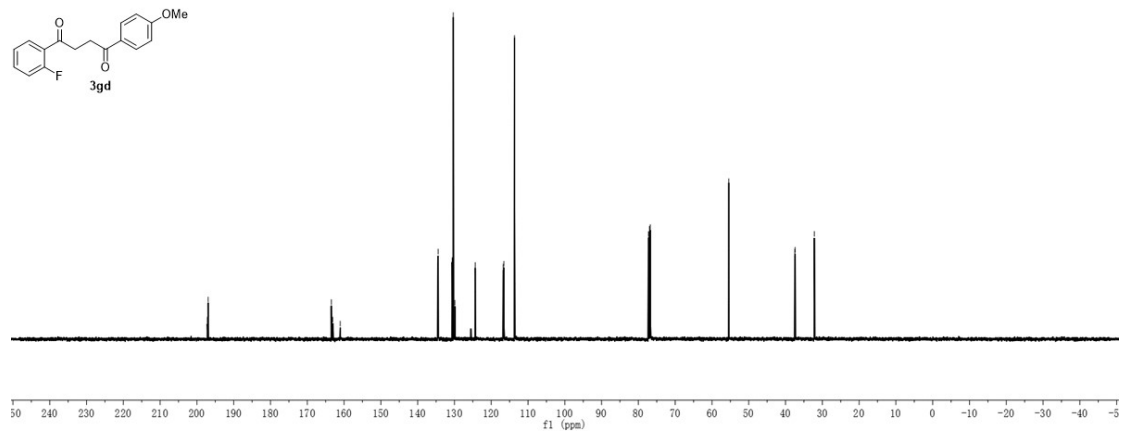

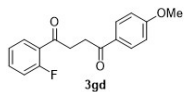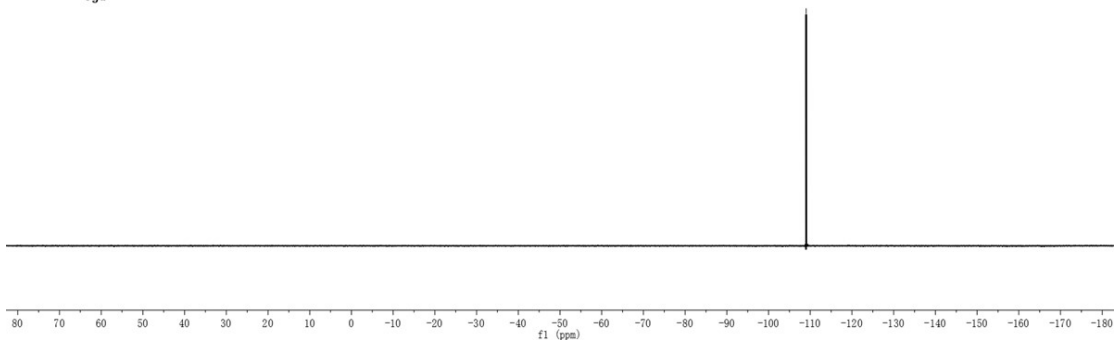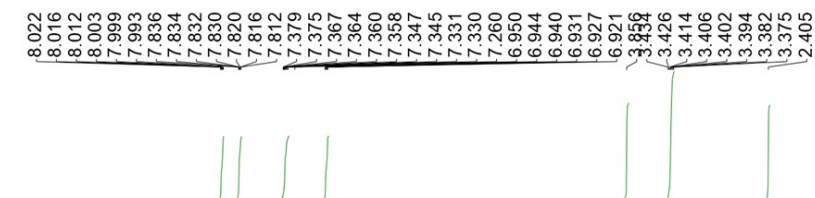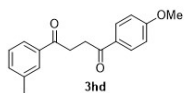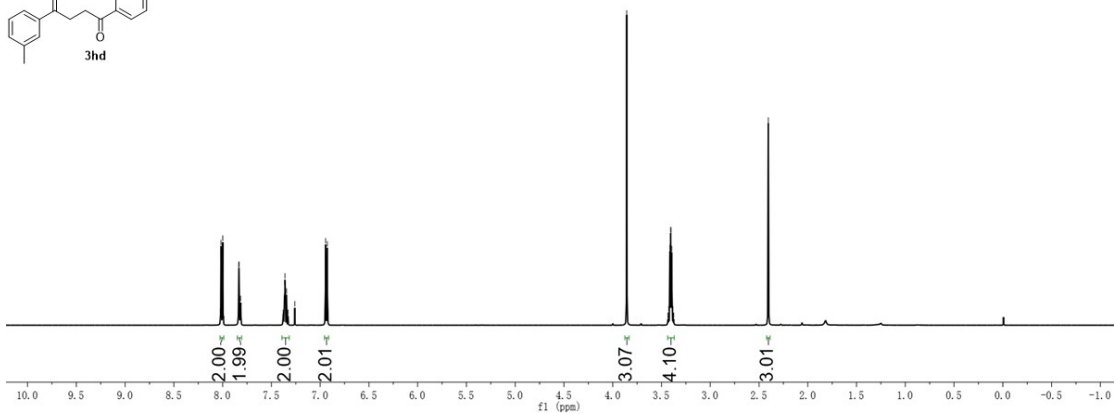

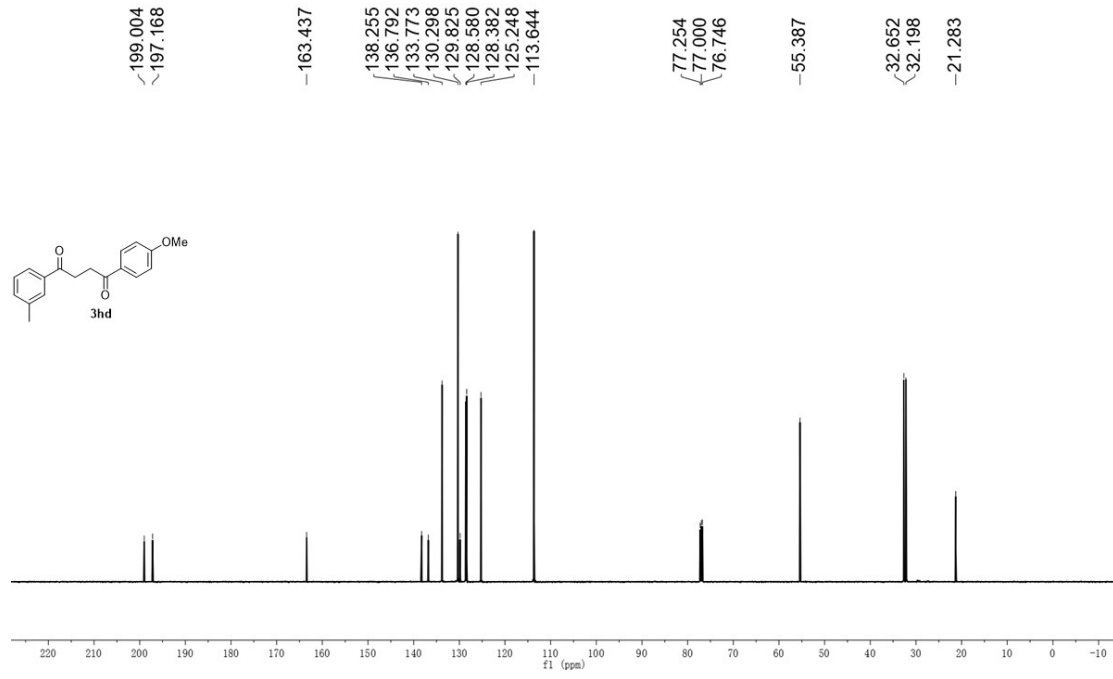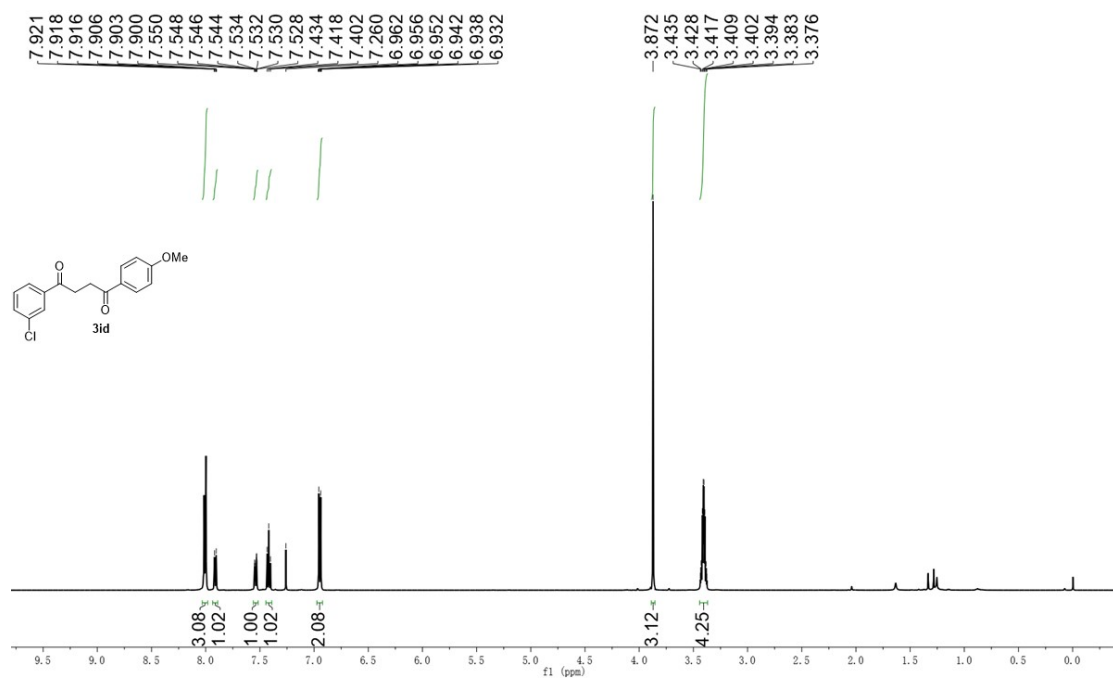

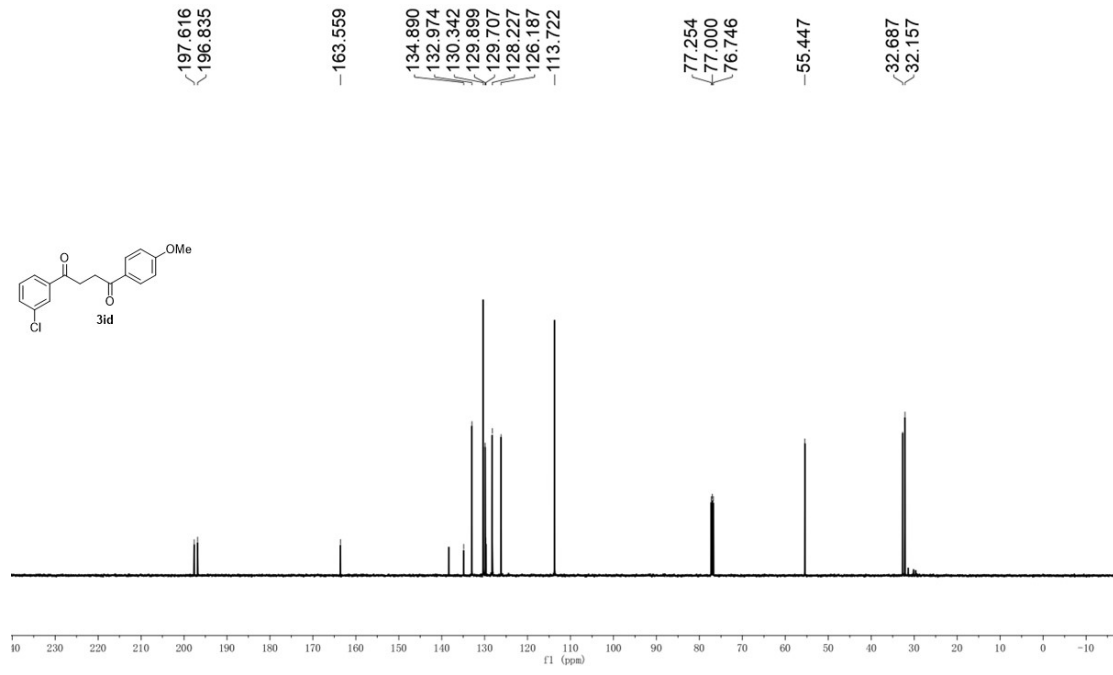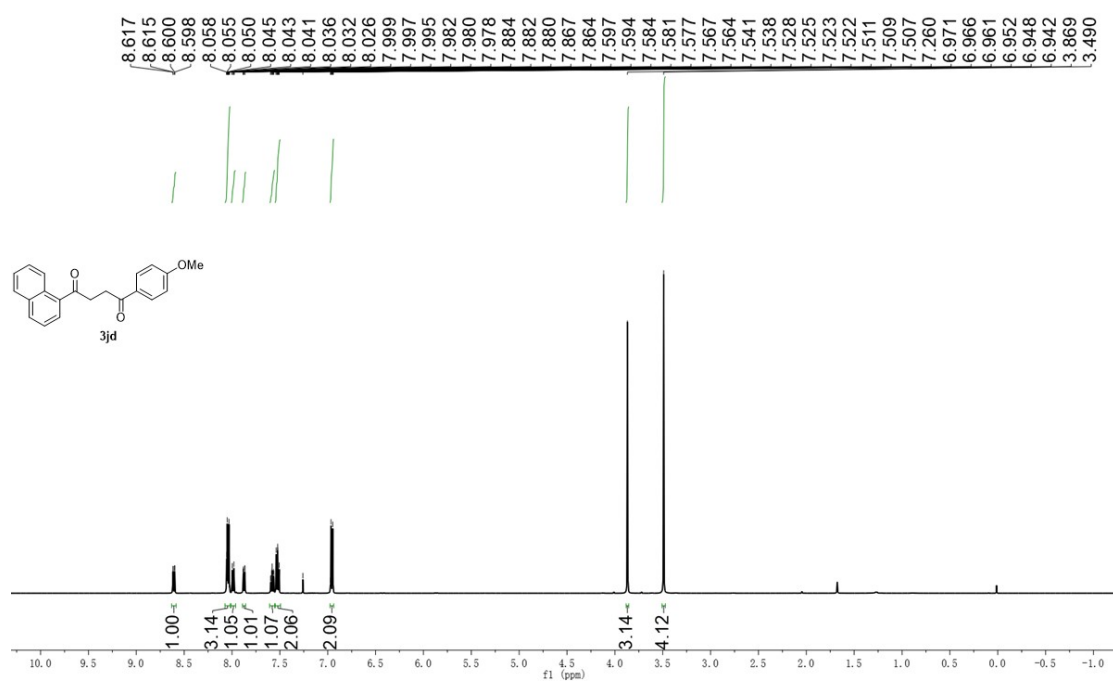

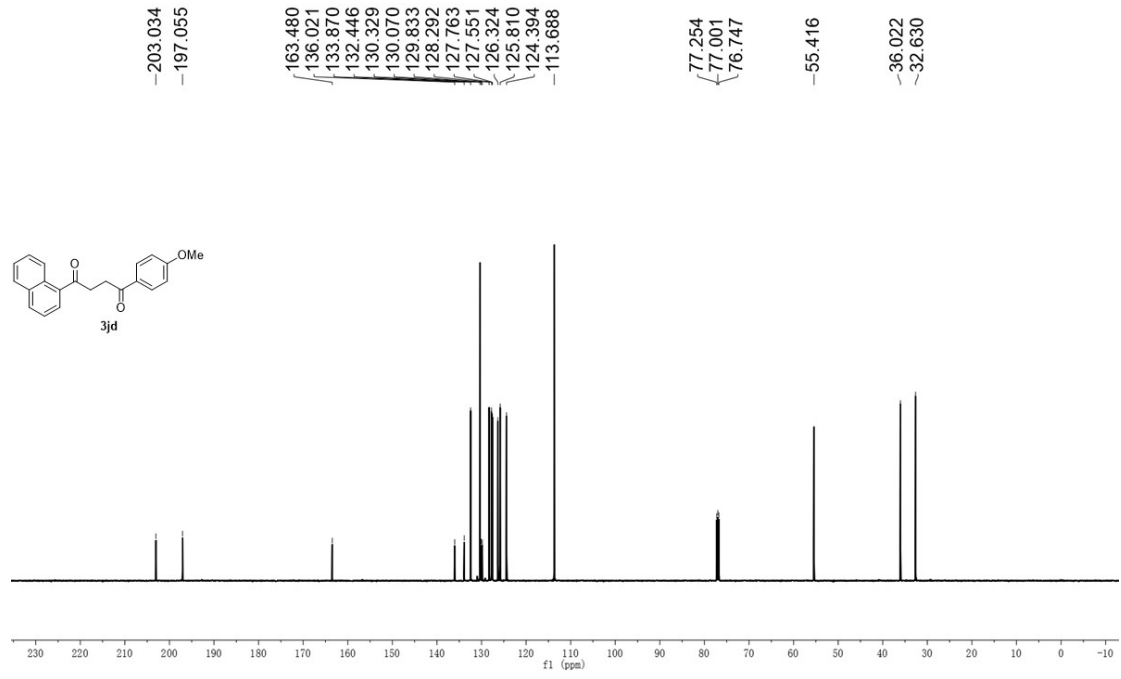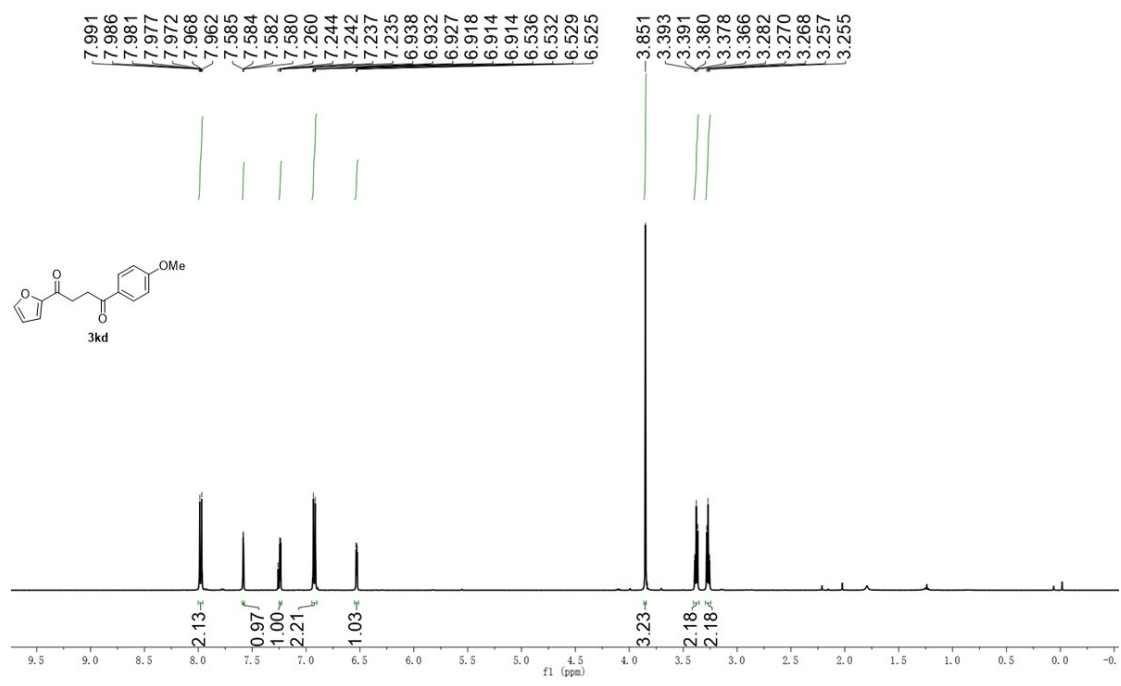

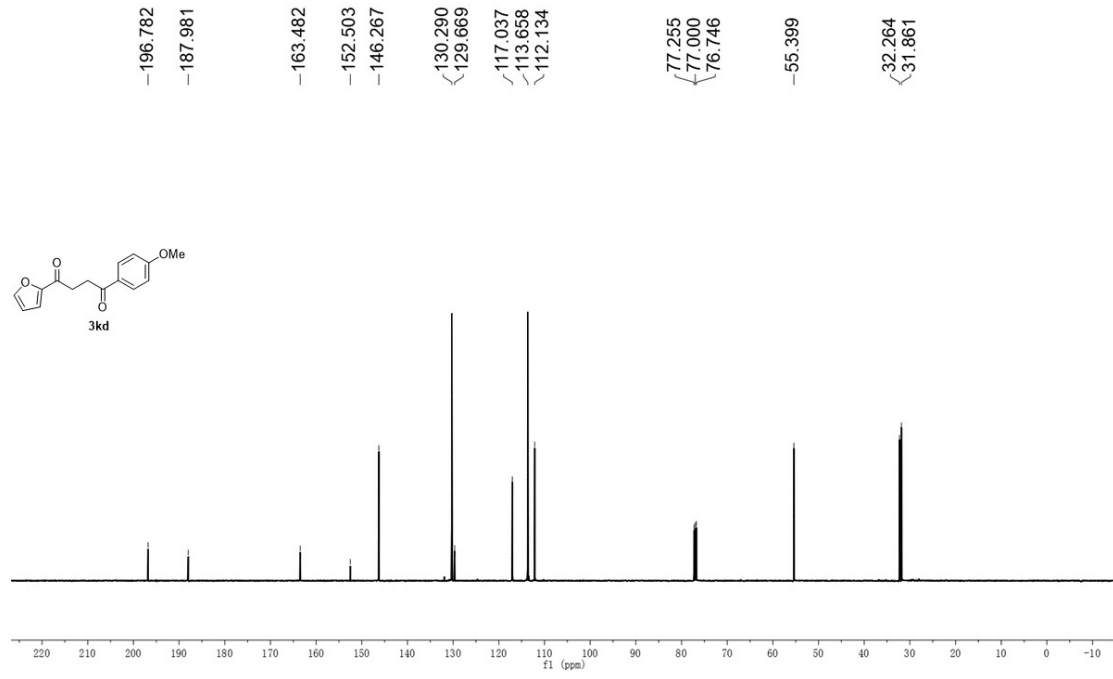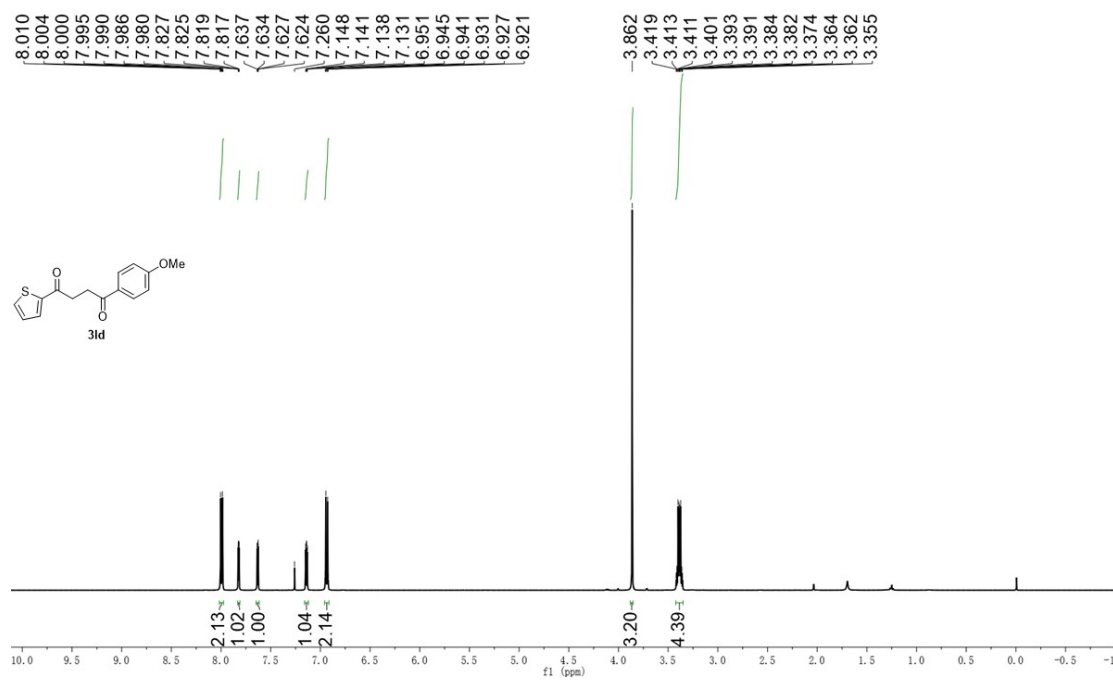



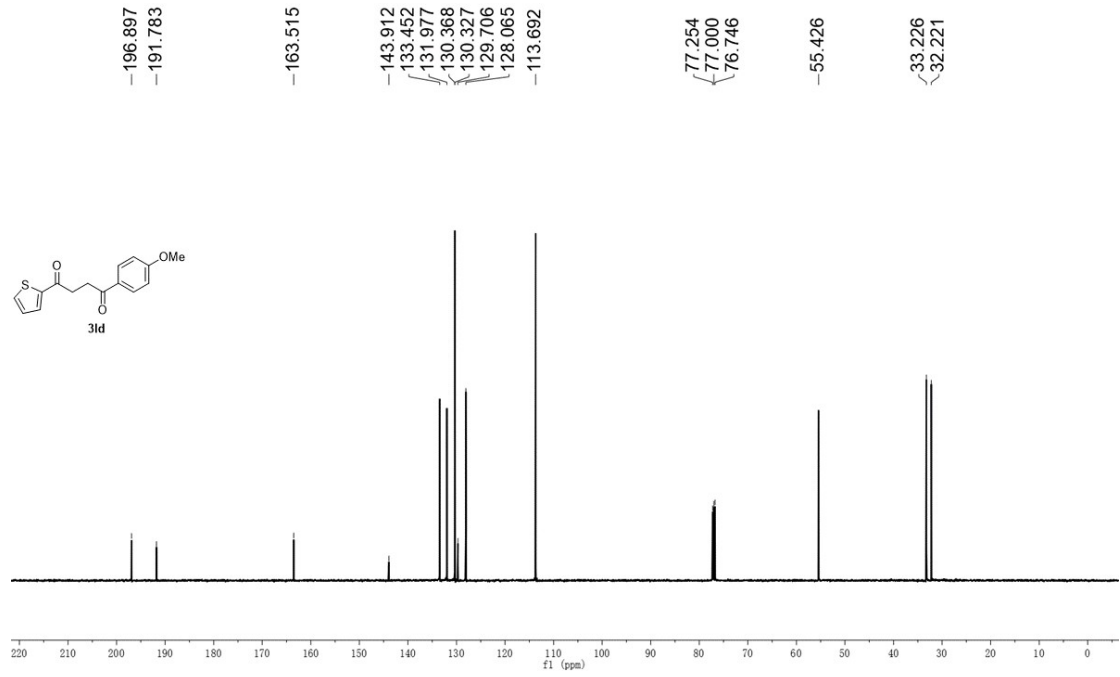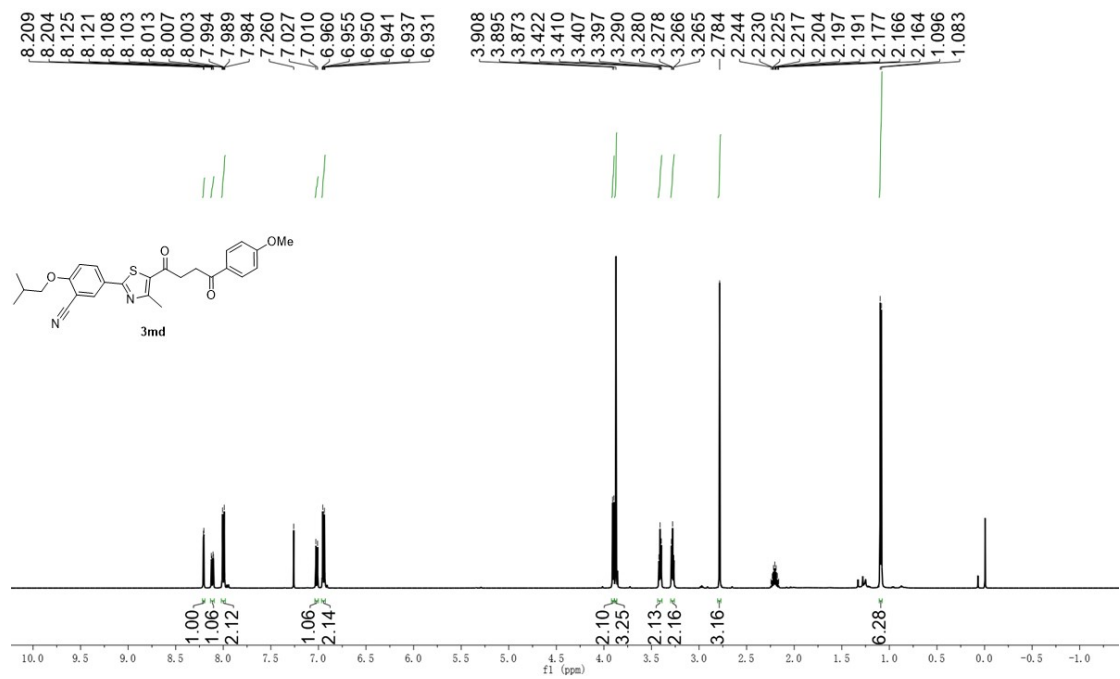

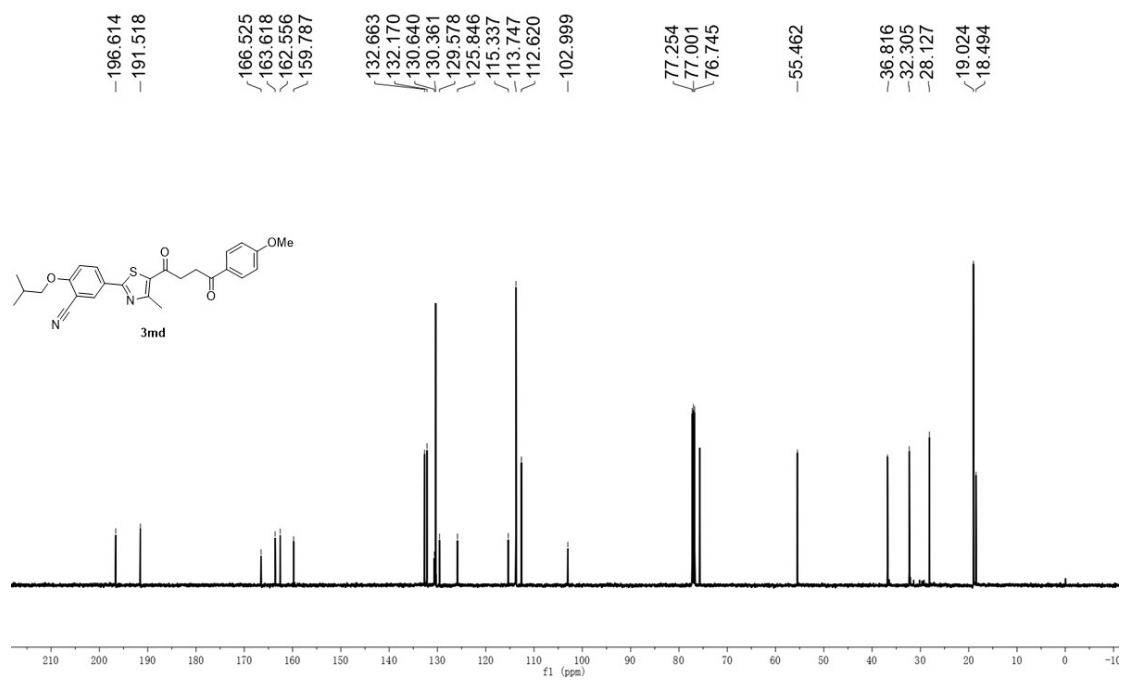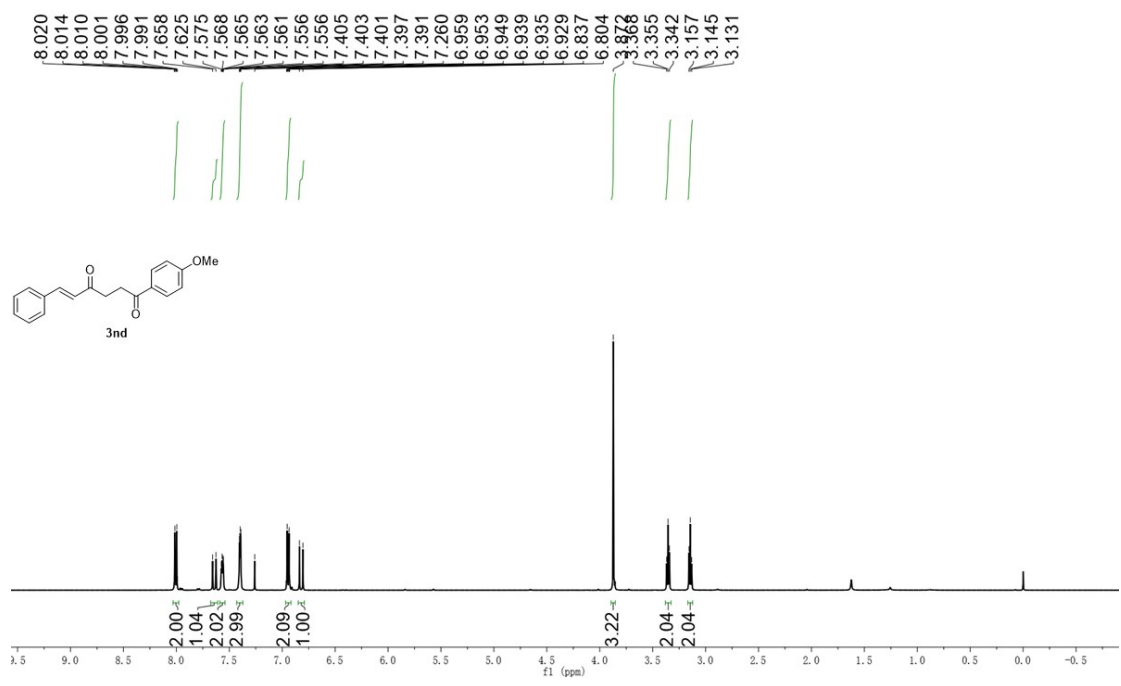

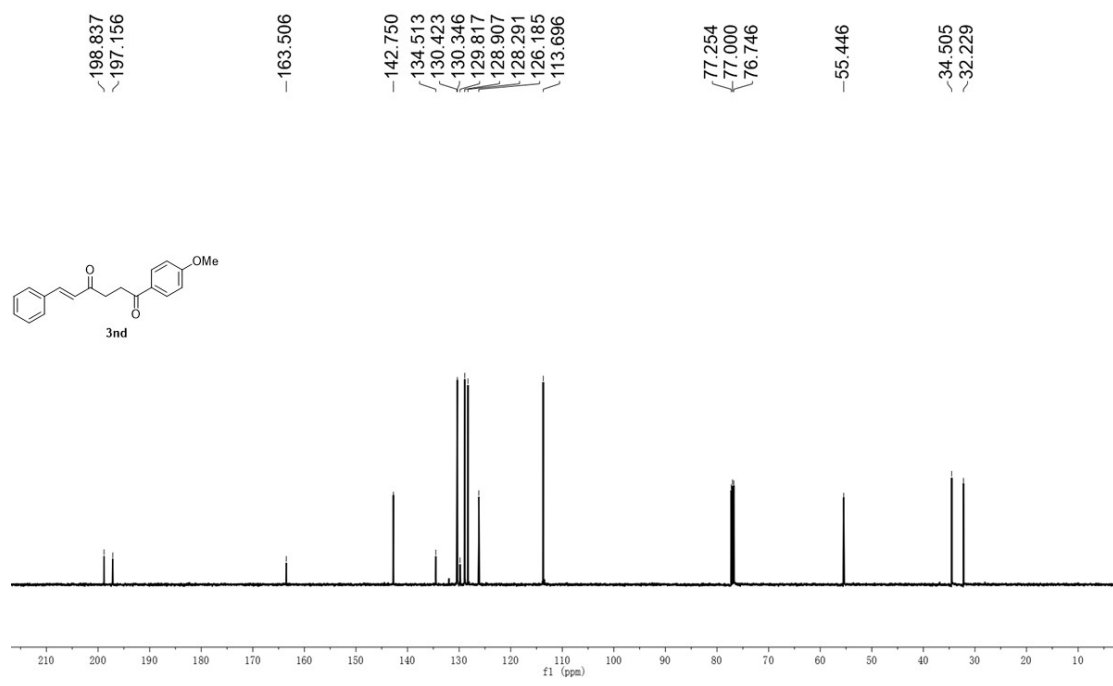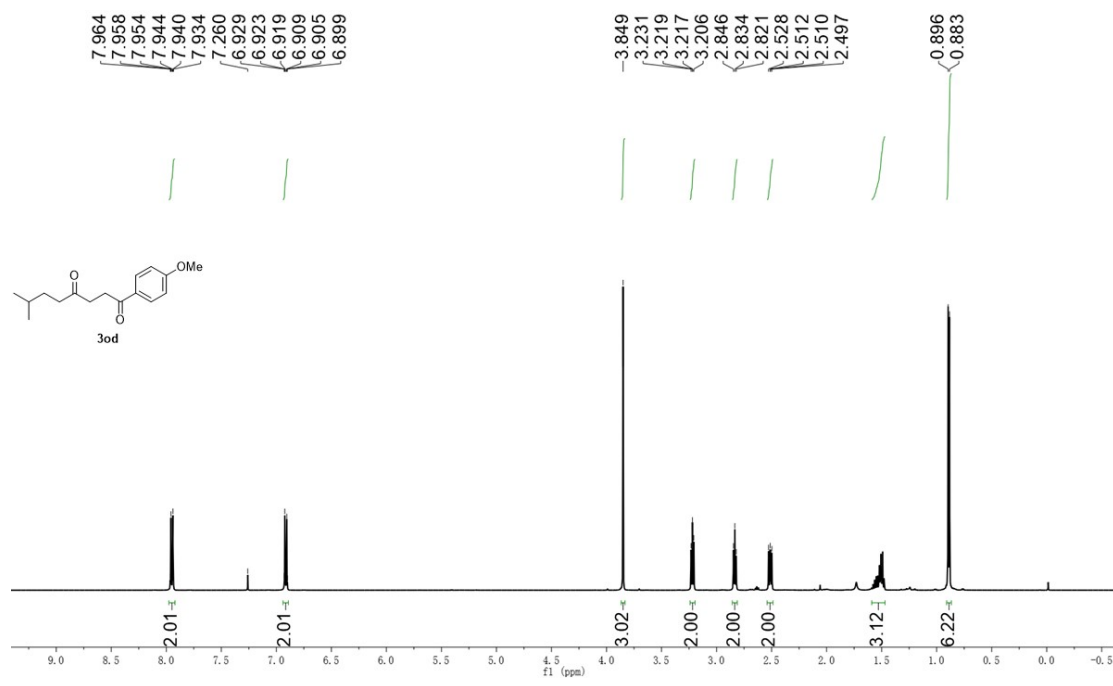

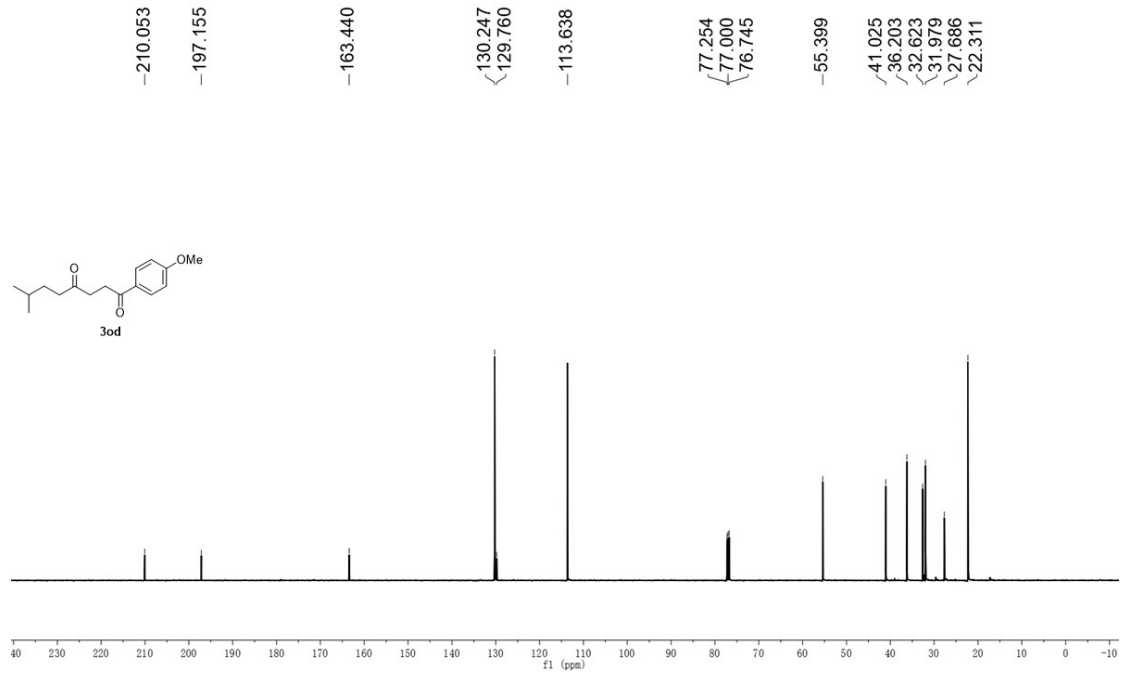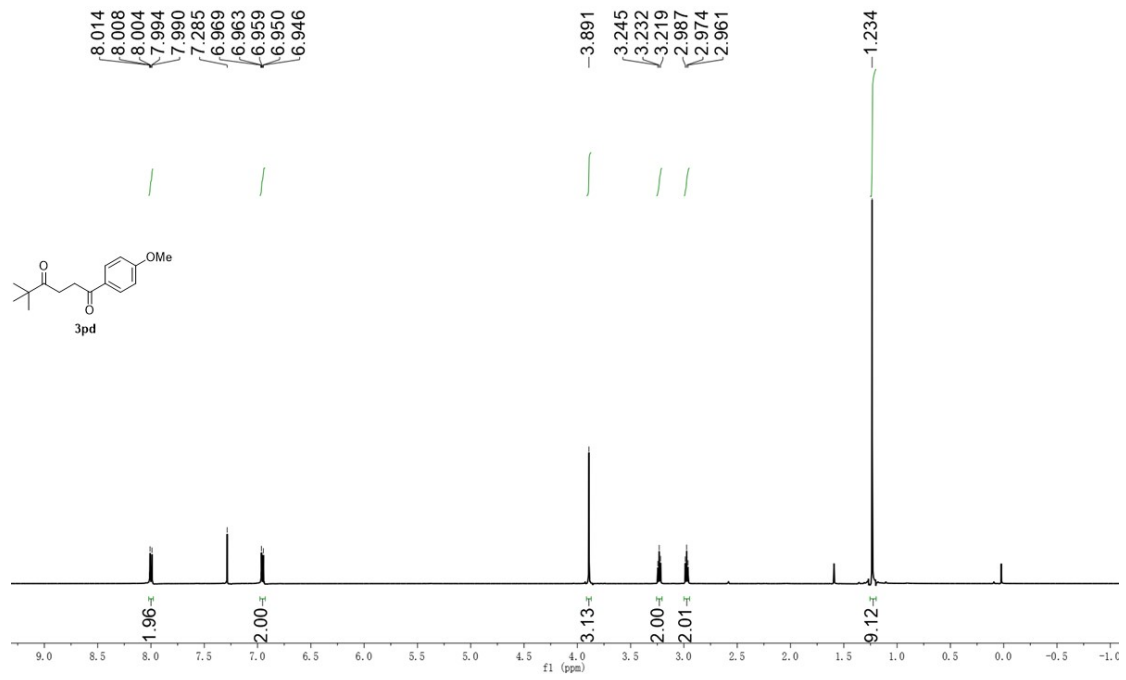

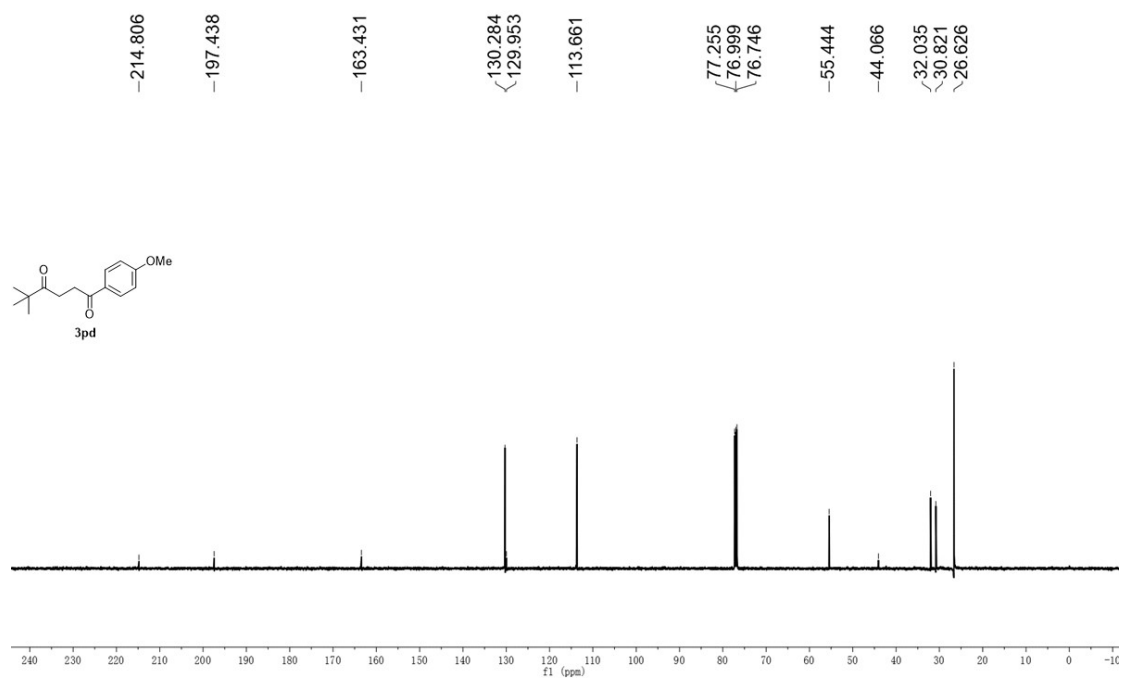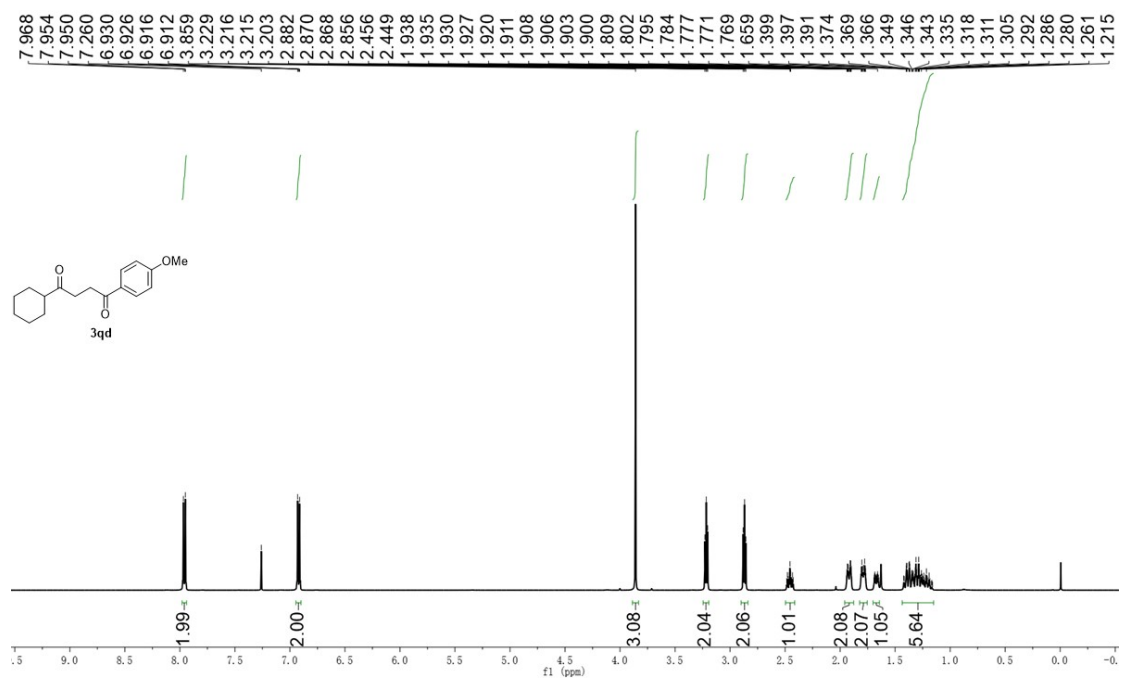

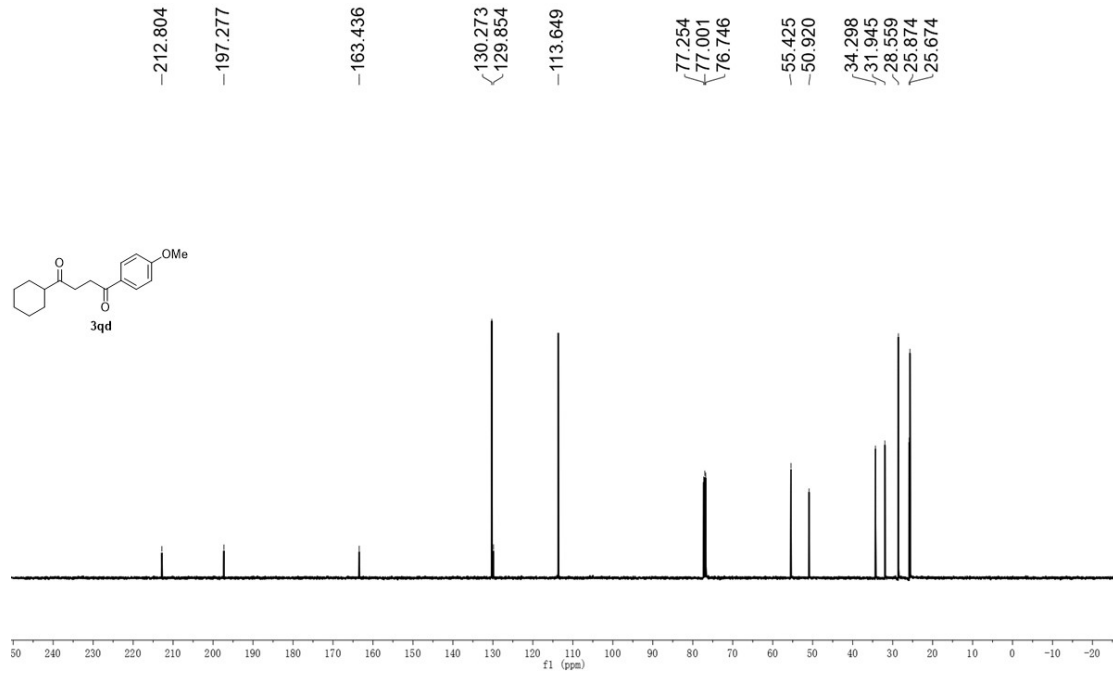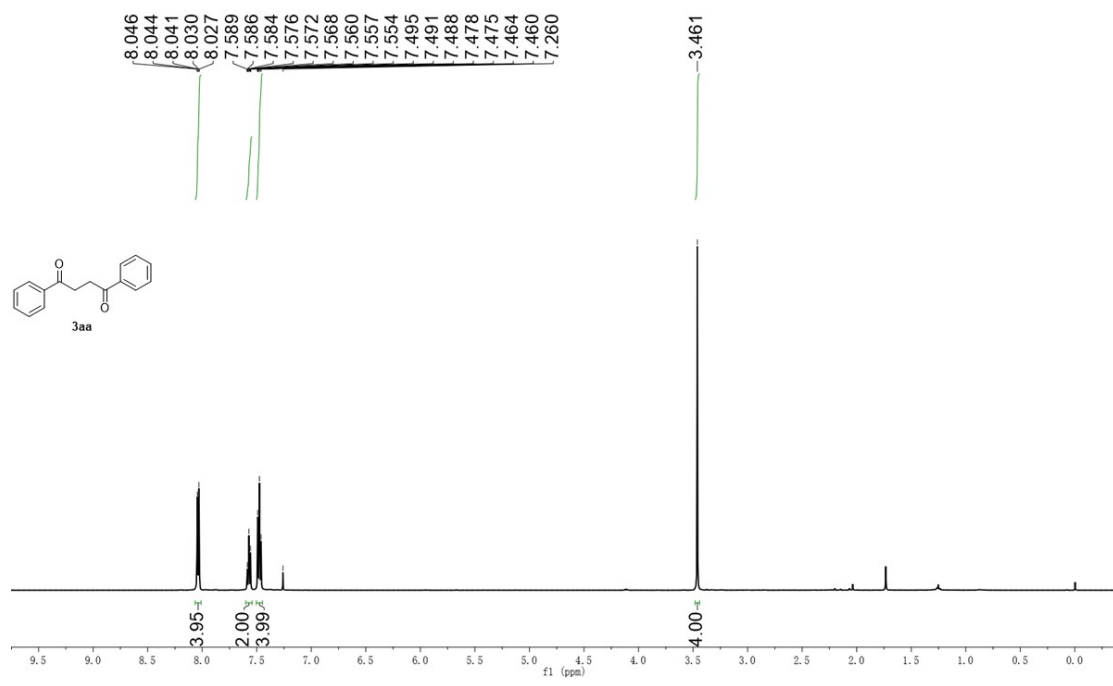

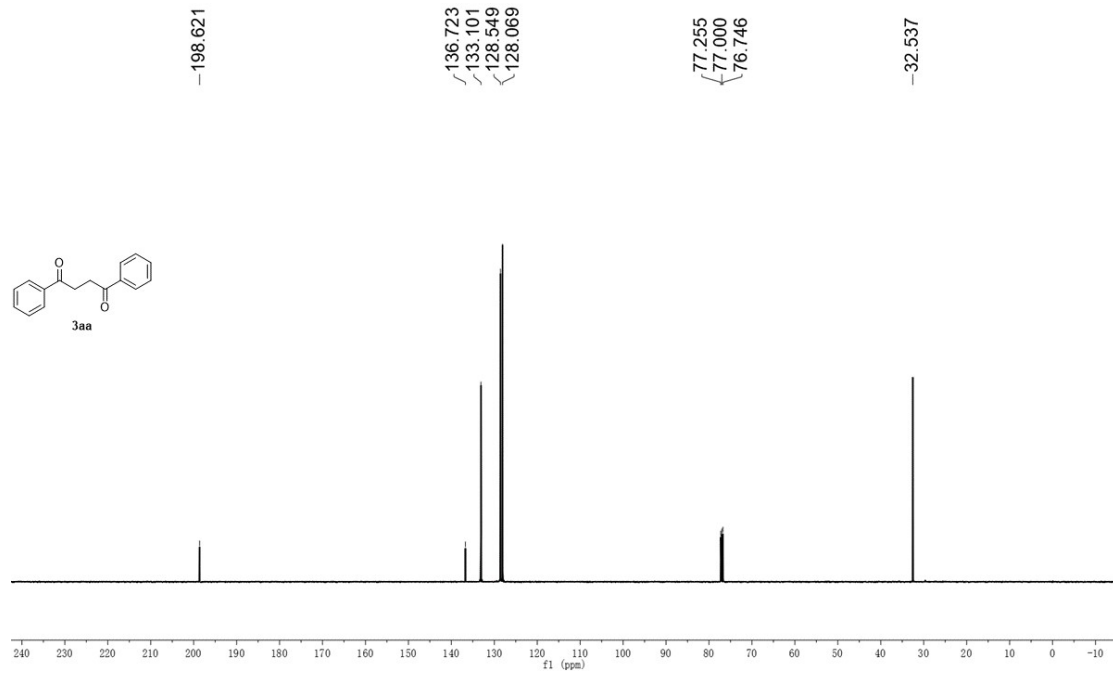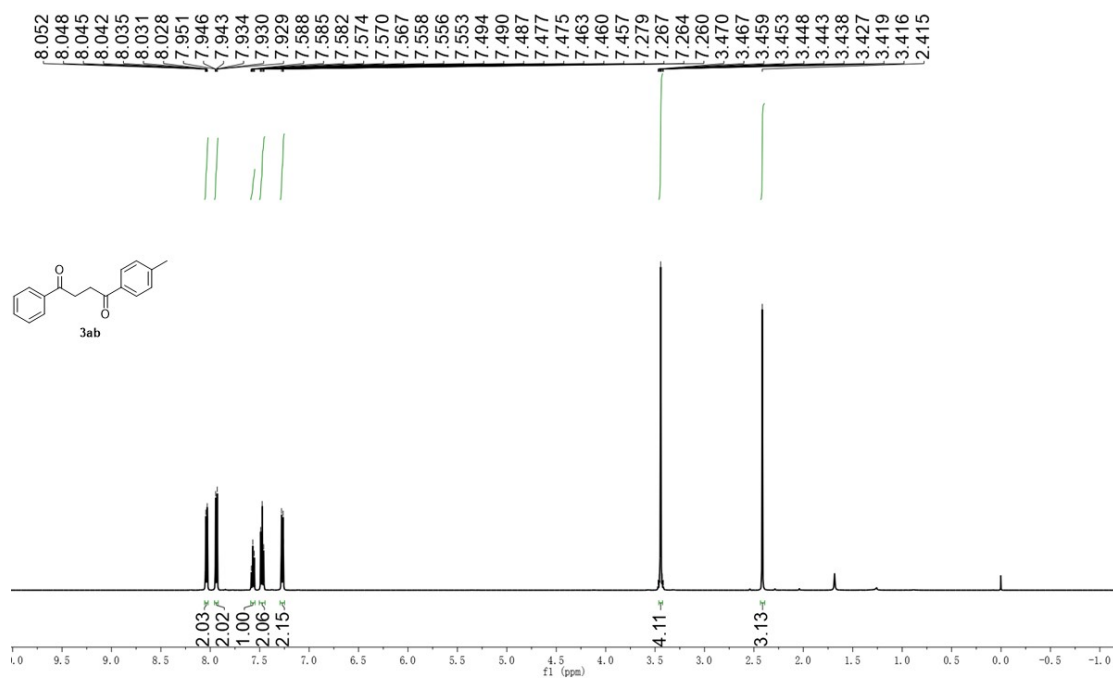

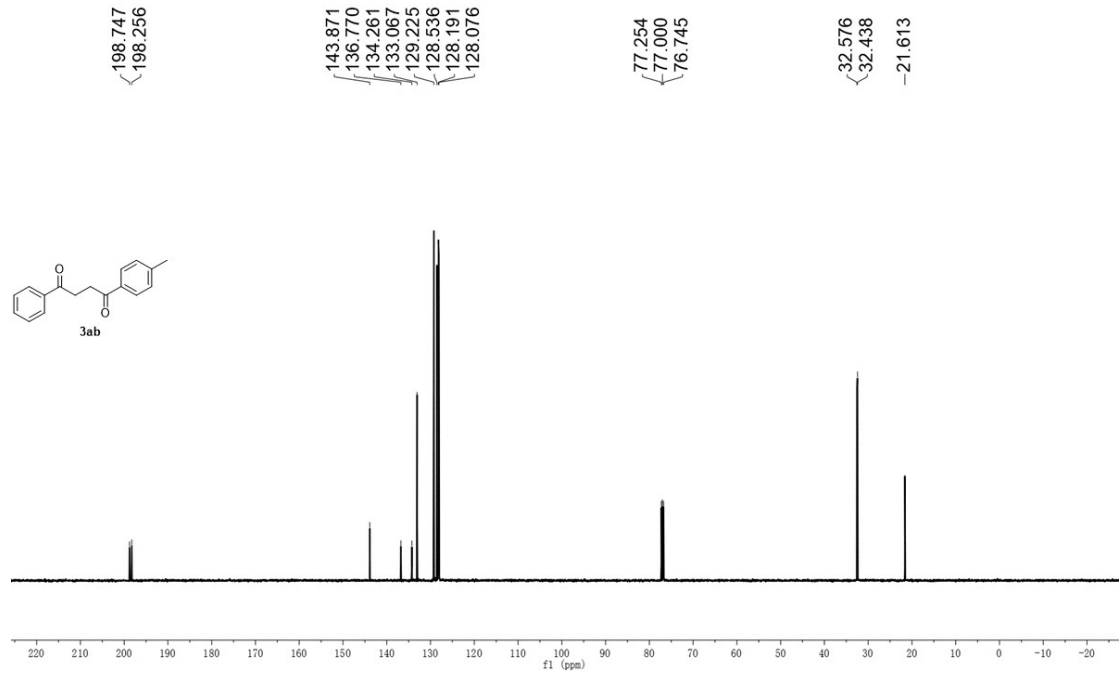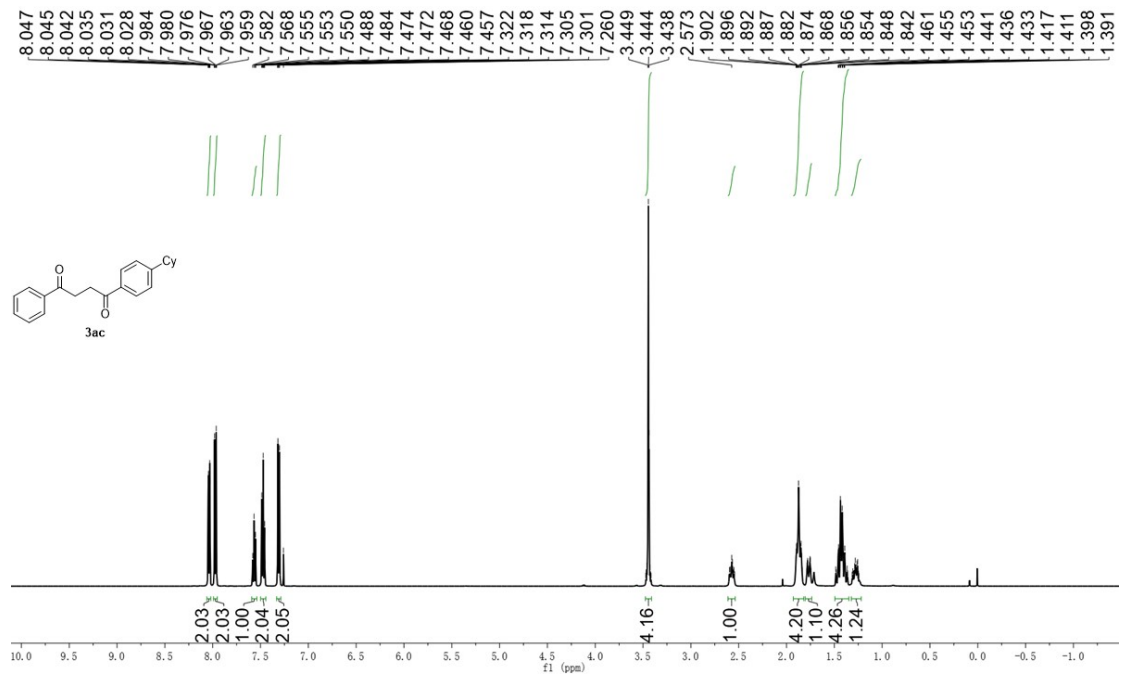



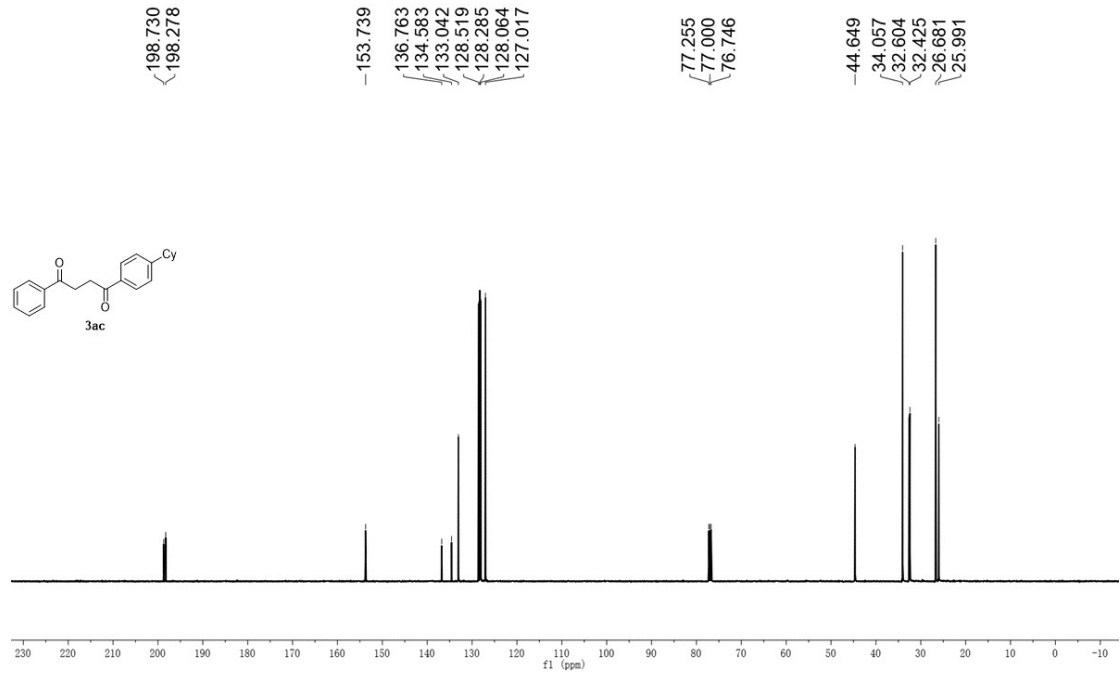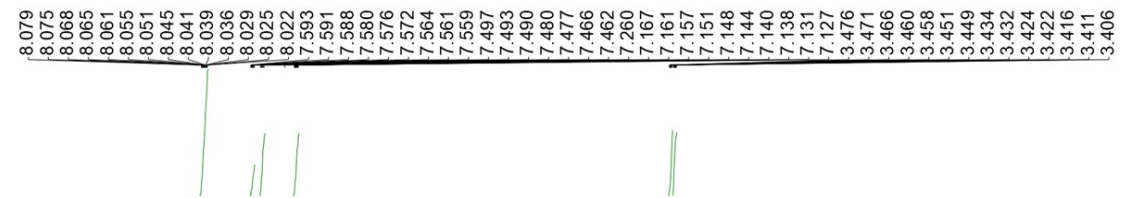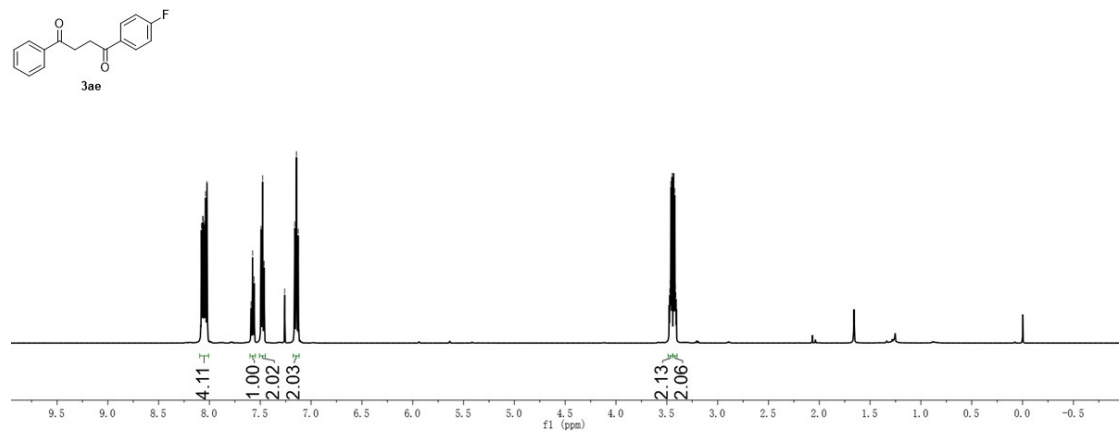

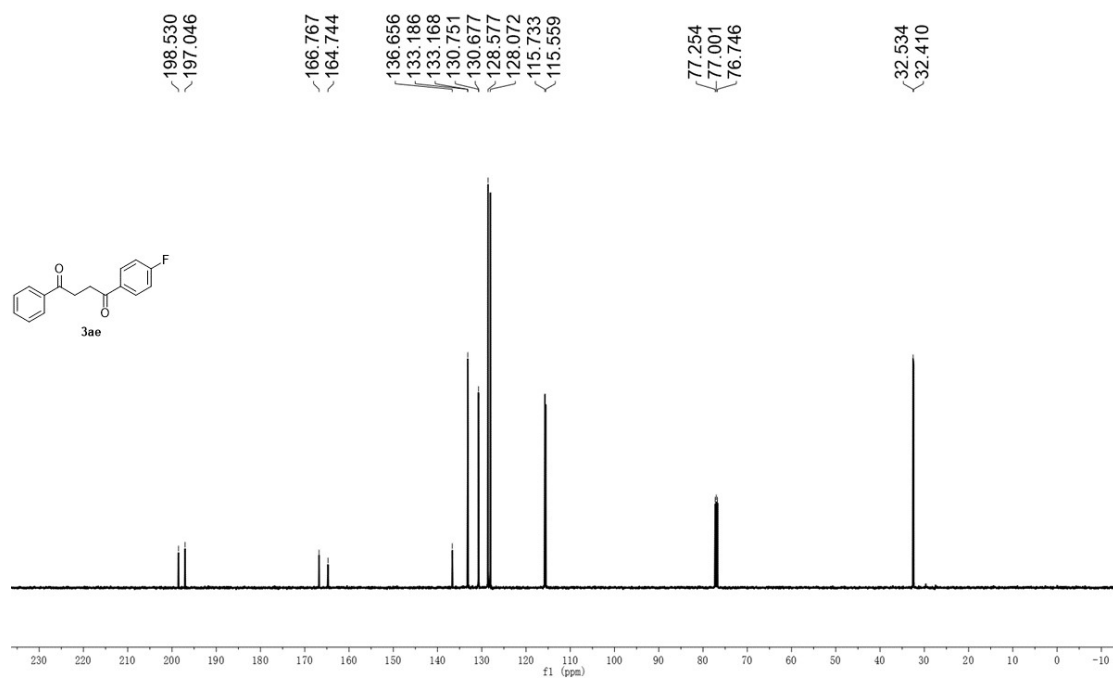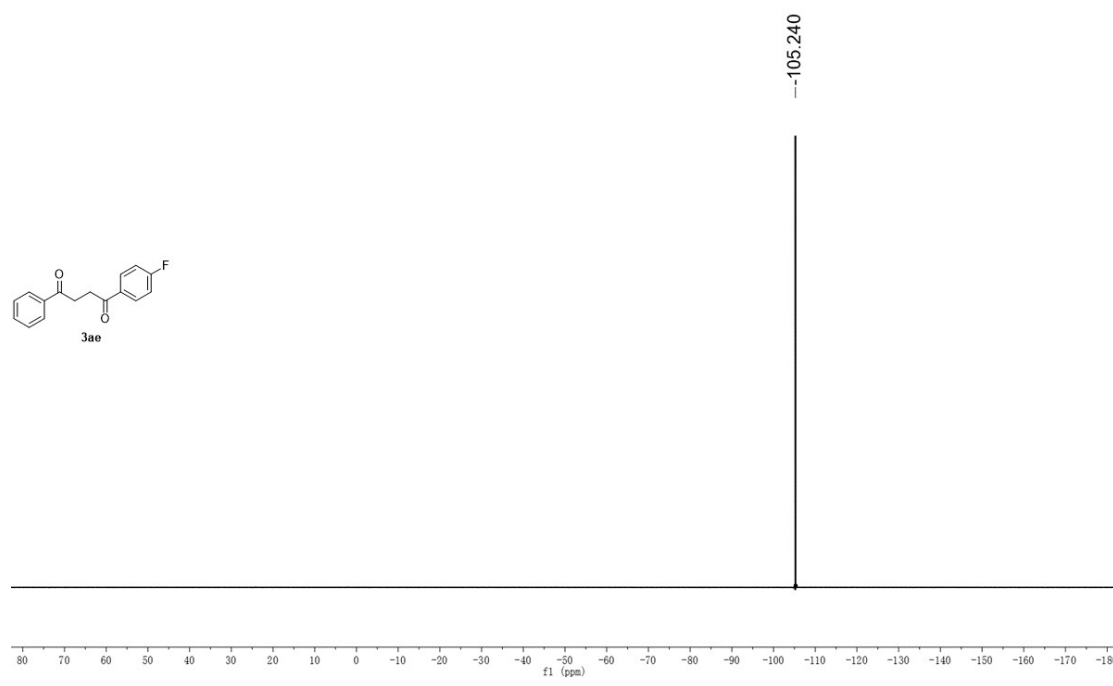

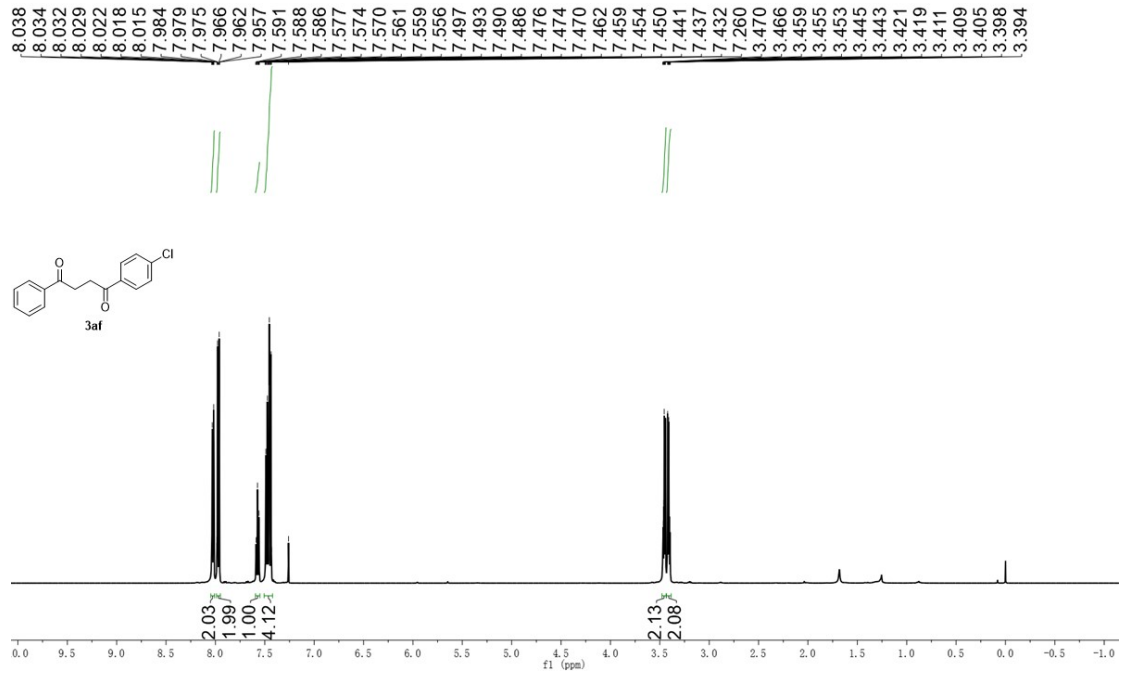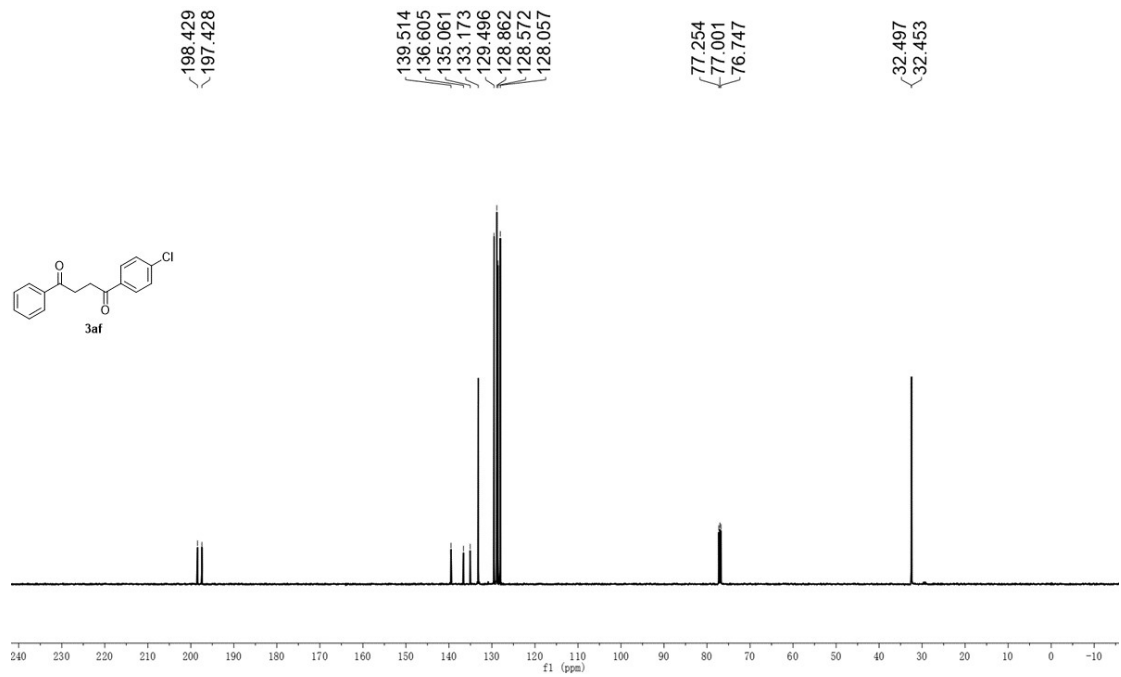

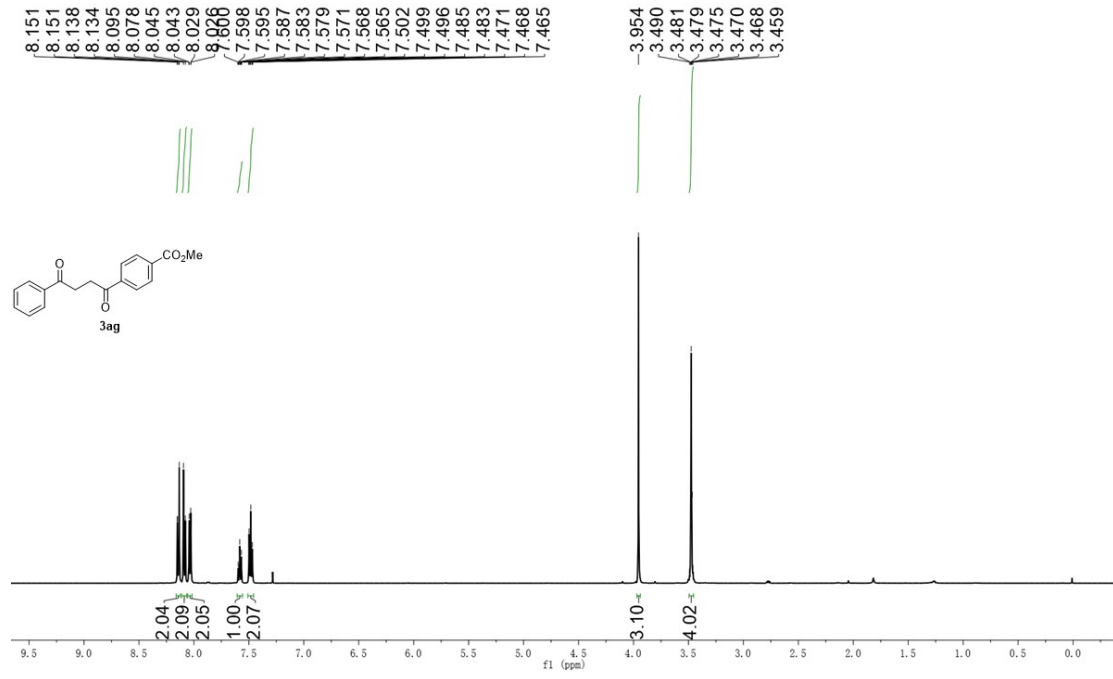

- 198.283
- 198.127
- 166.123
- 139.897
- 136.540
- 133.798
- 133.144
- 129.740
- 128.532
- 128.013
- 127.935
- 77.254
- 77.000
- 76.746
- 32.797
- 32.438

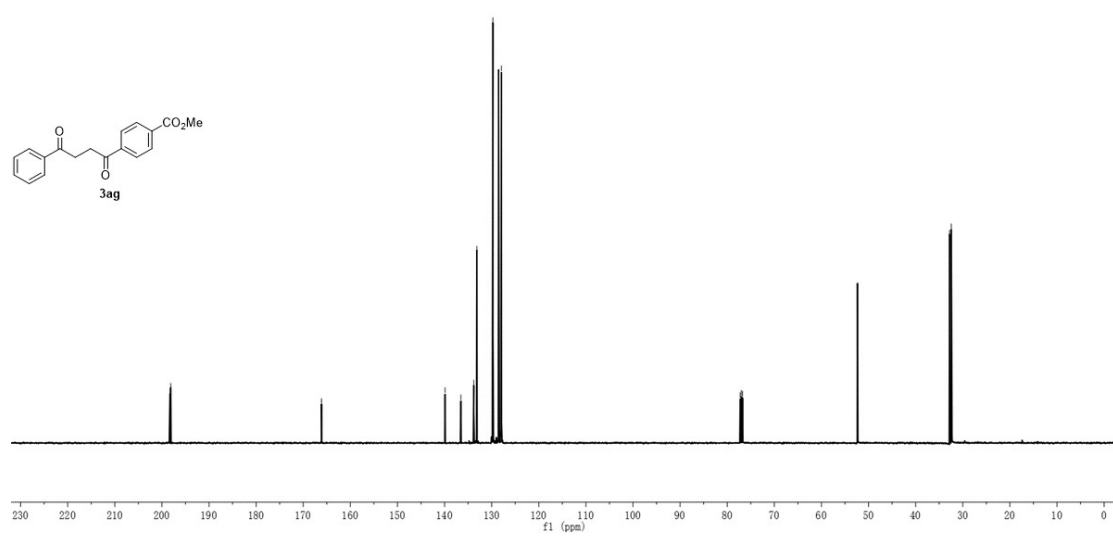

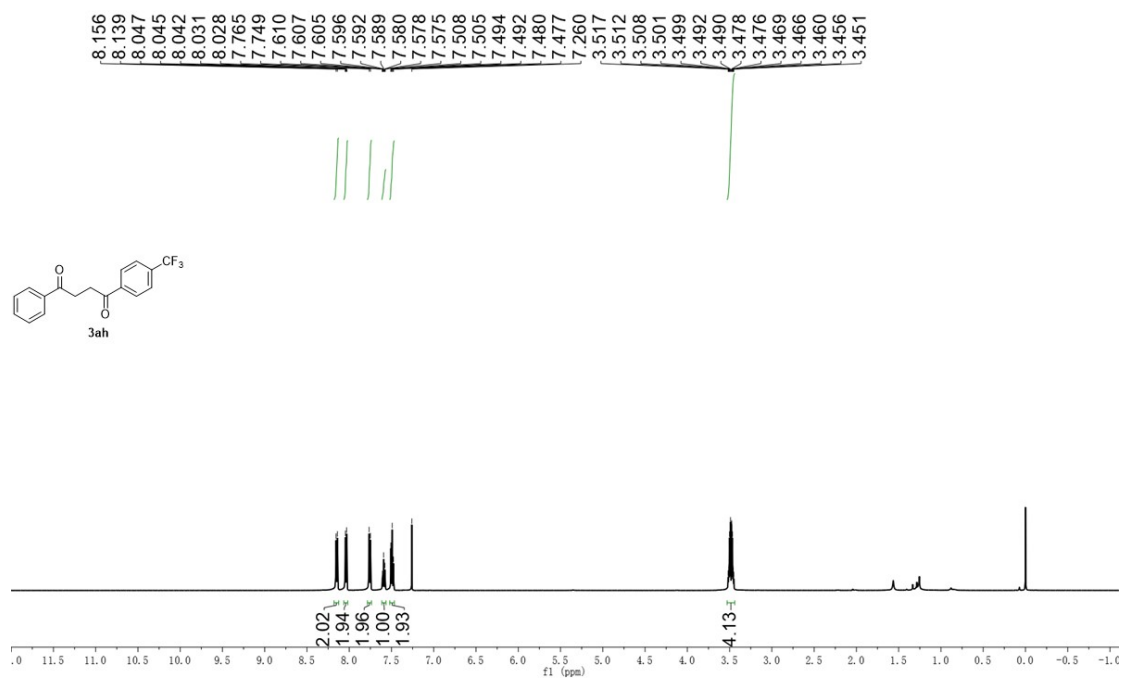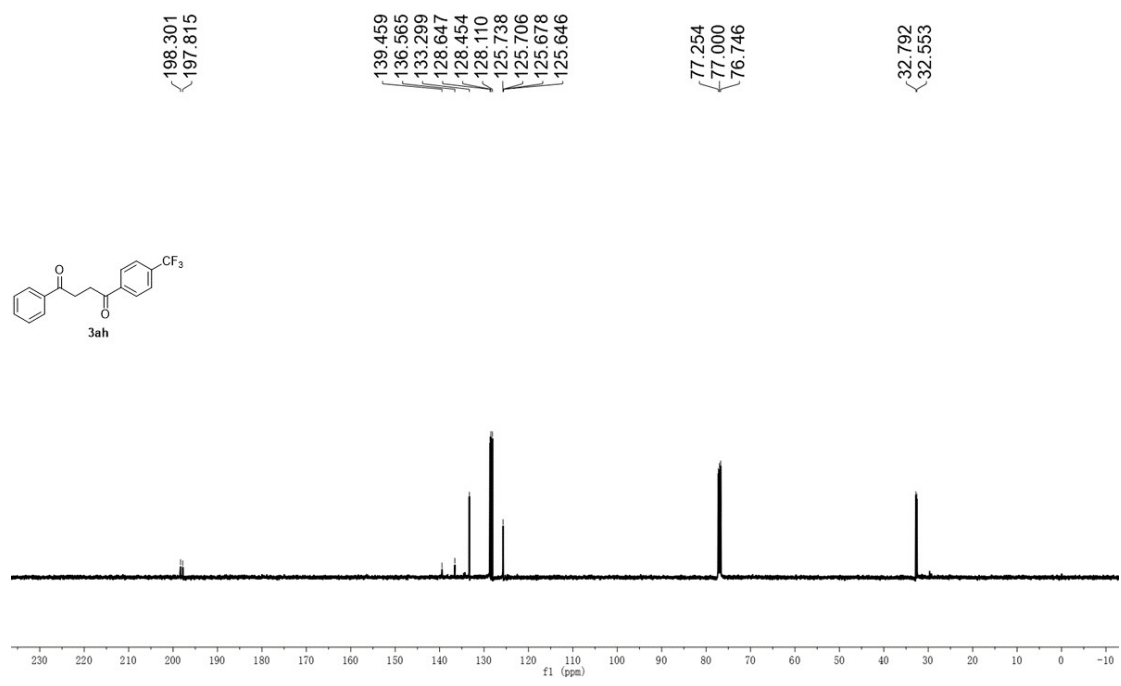

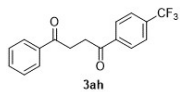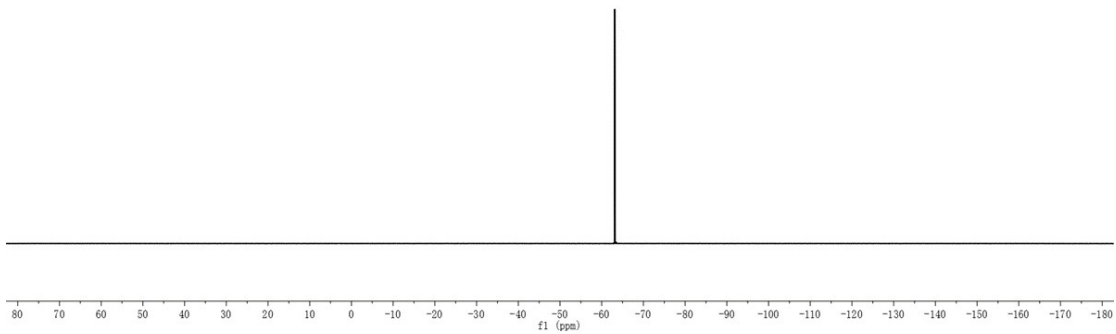

-63.105

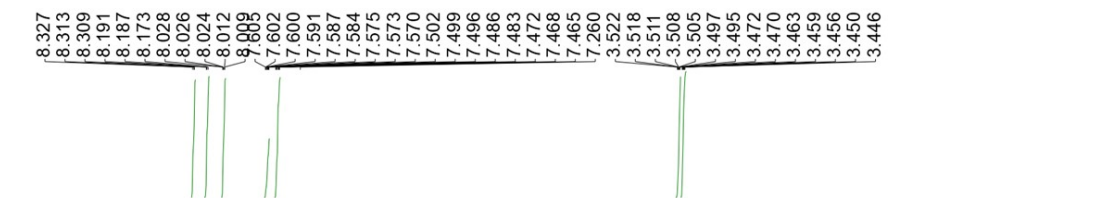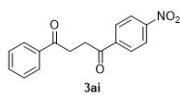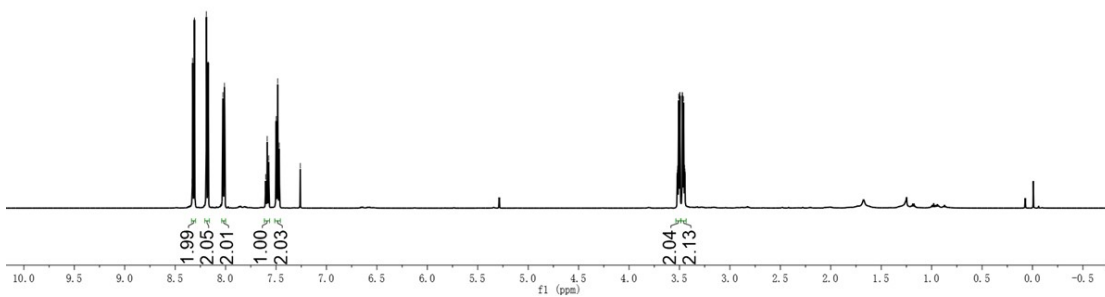

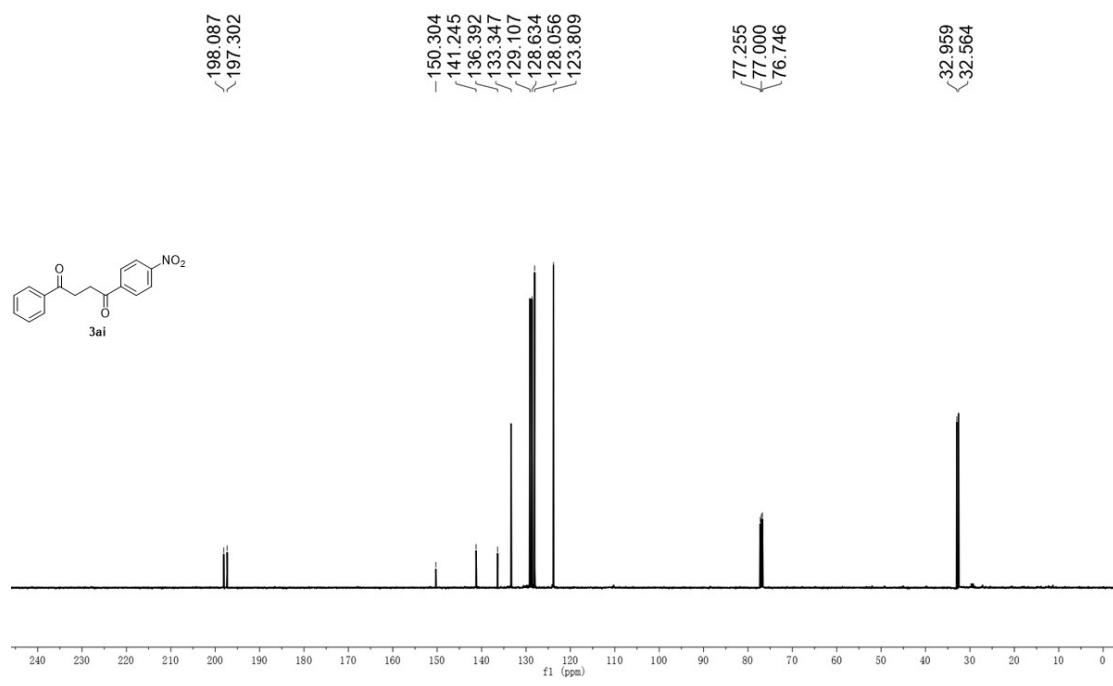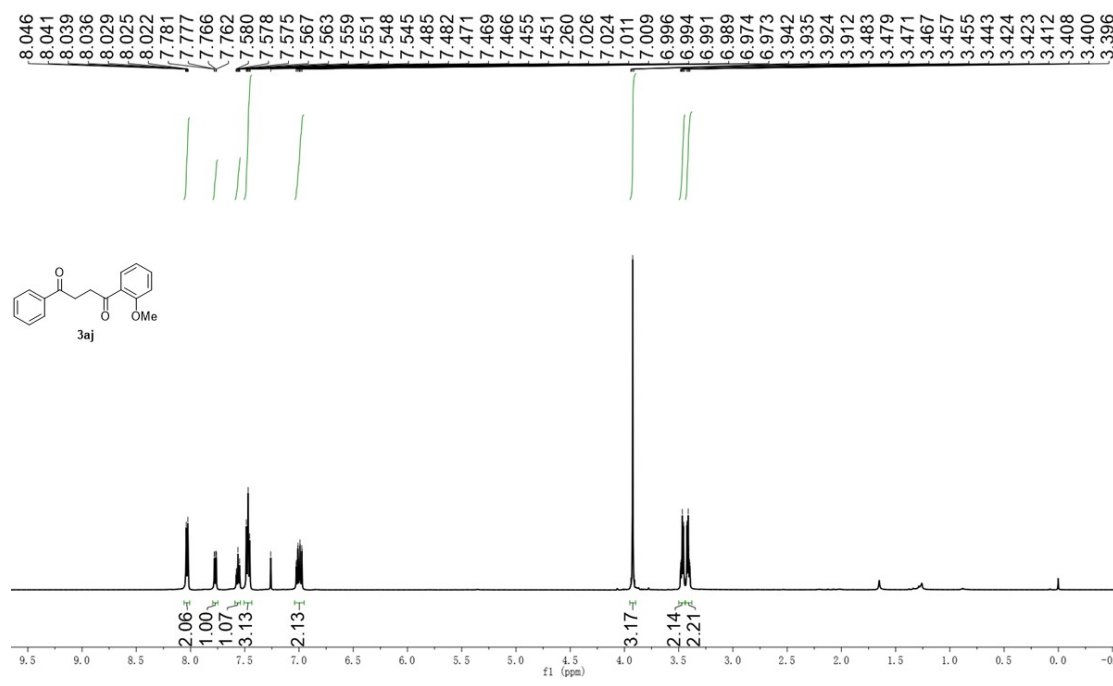

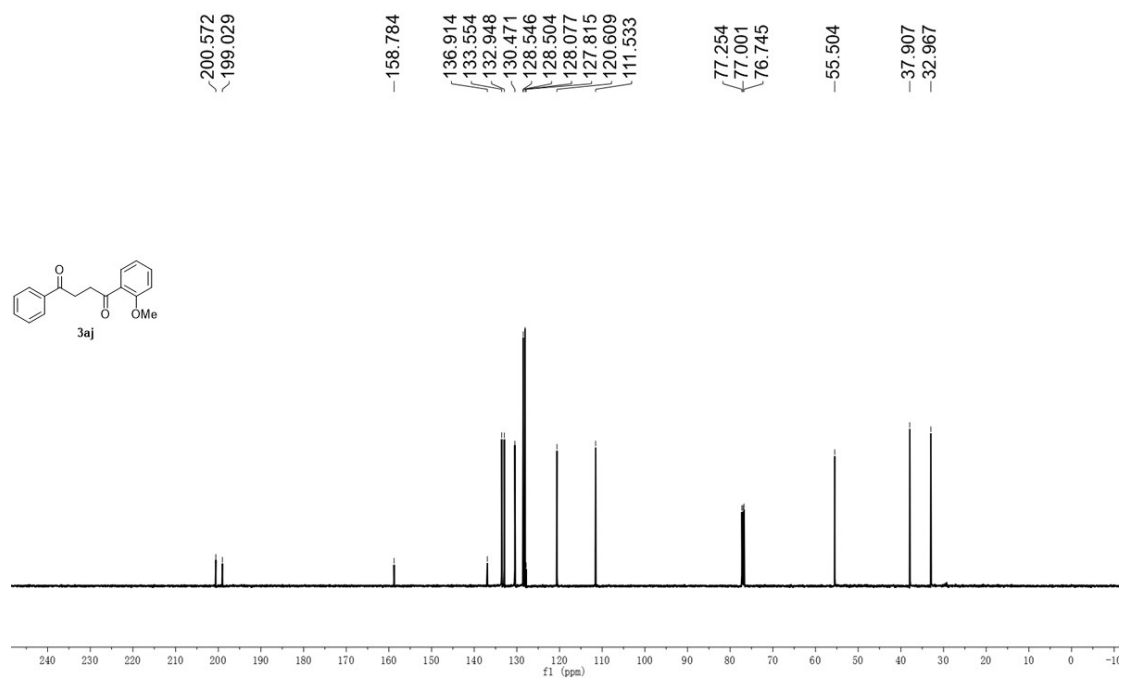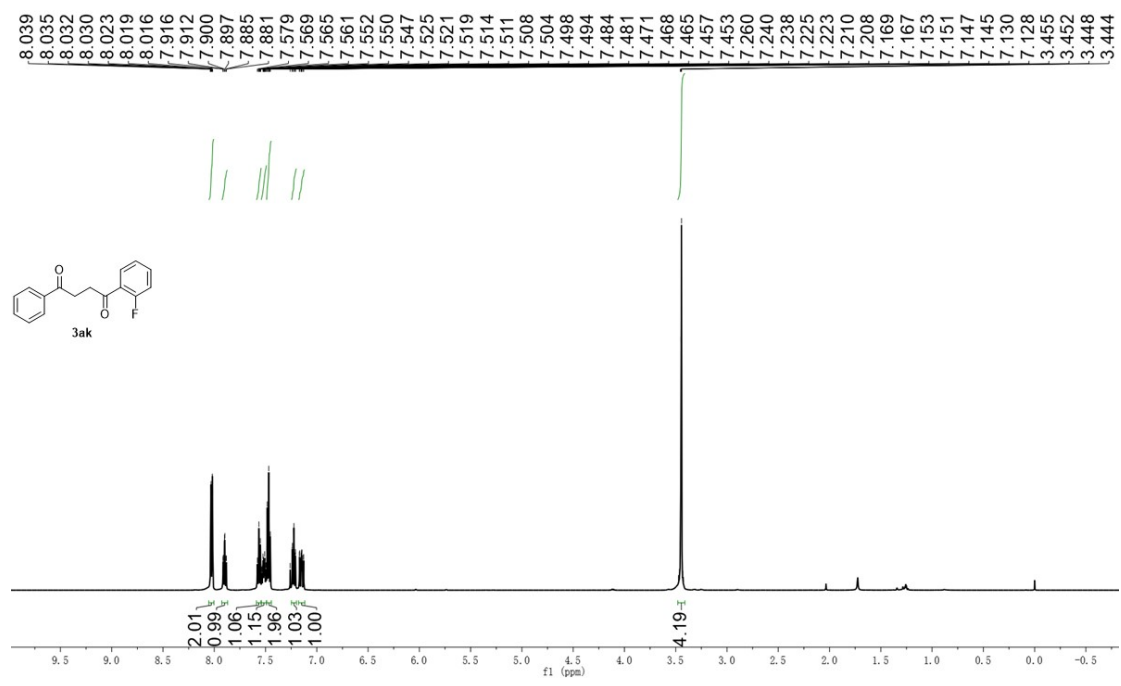



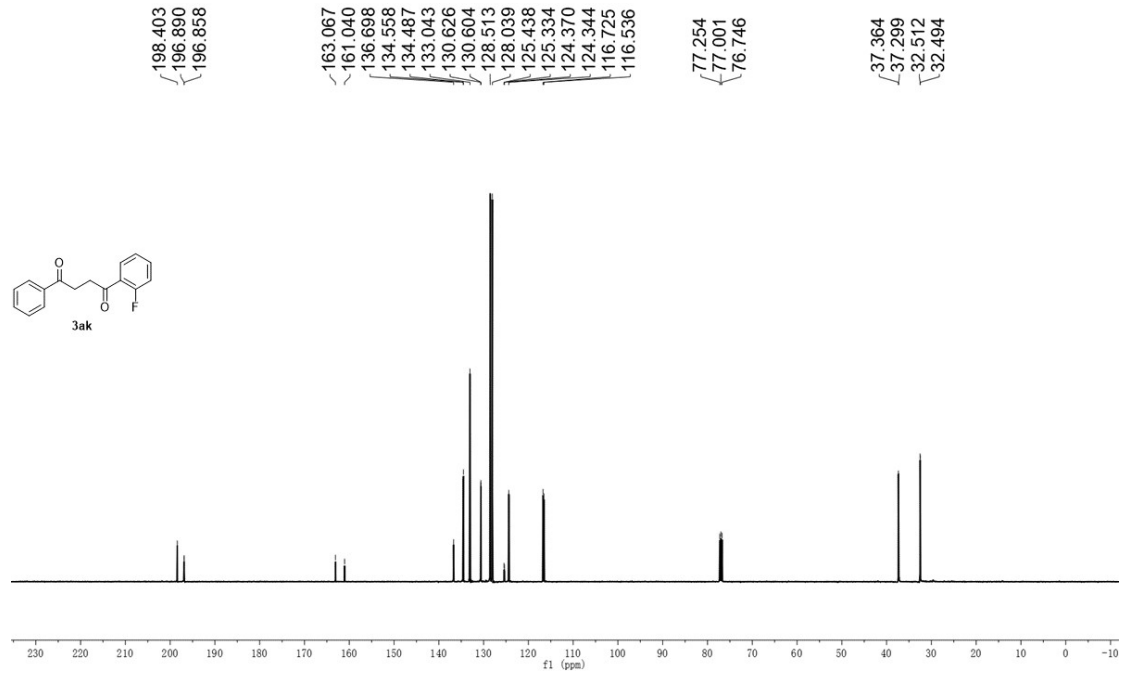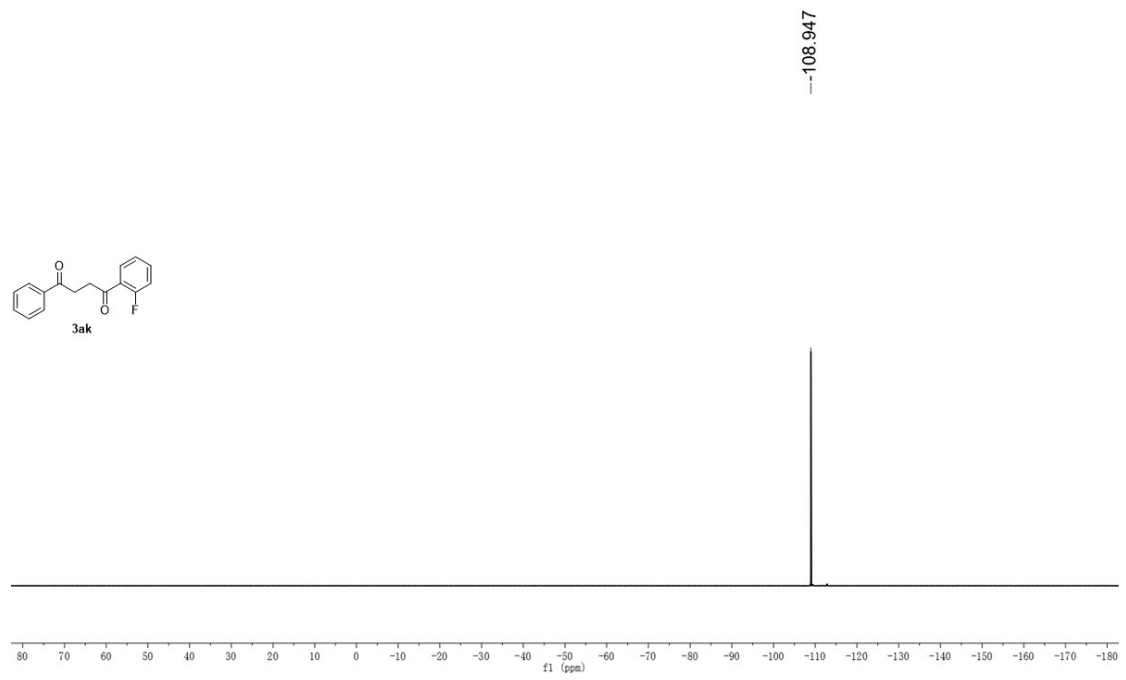

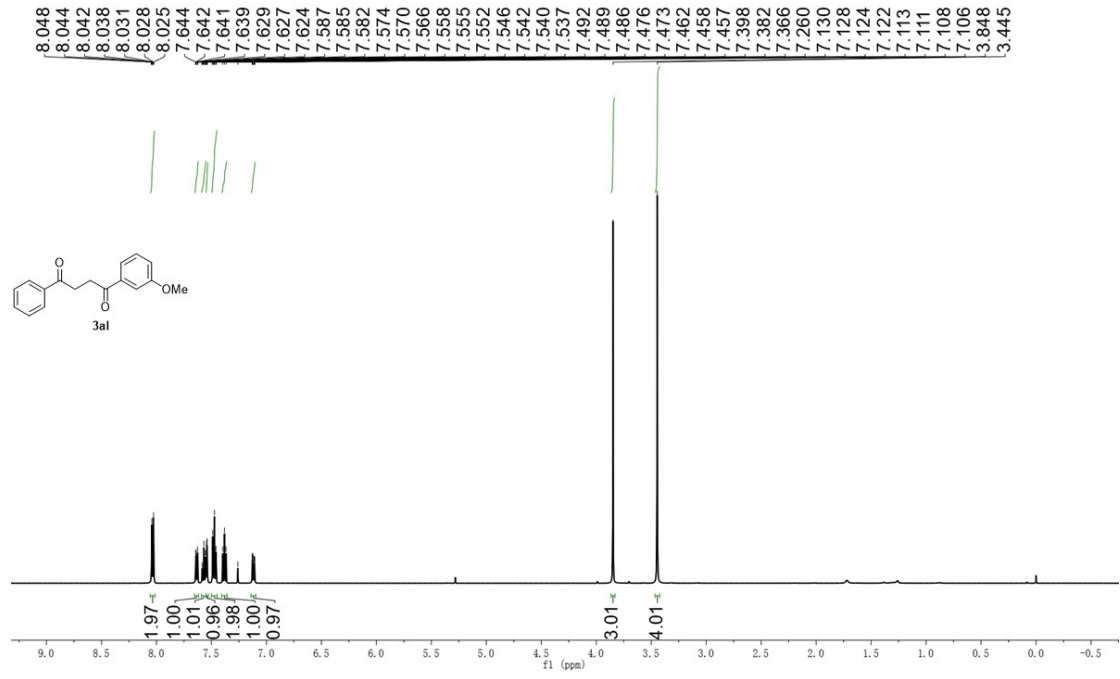

198.593  
198.427

159.760

138.064

136.714

133.083

129.540

128.534

128.055

120.739

119.643

112.215

77.254

77.000

76.746

55.376

32.670

32.541

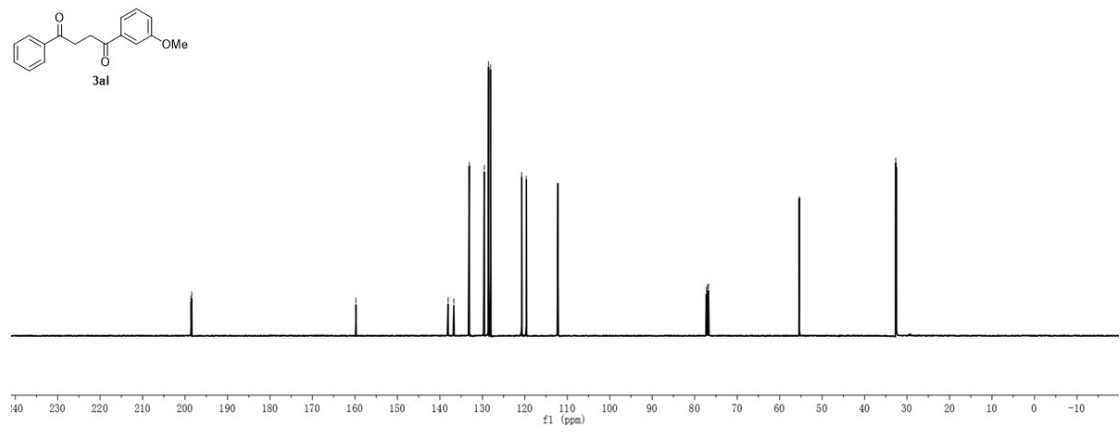

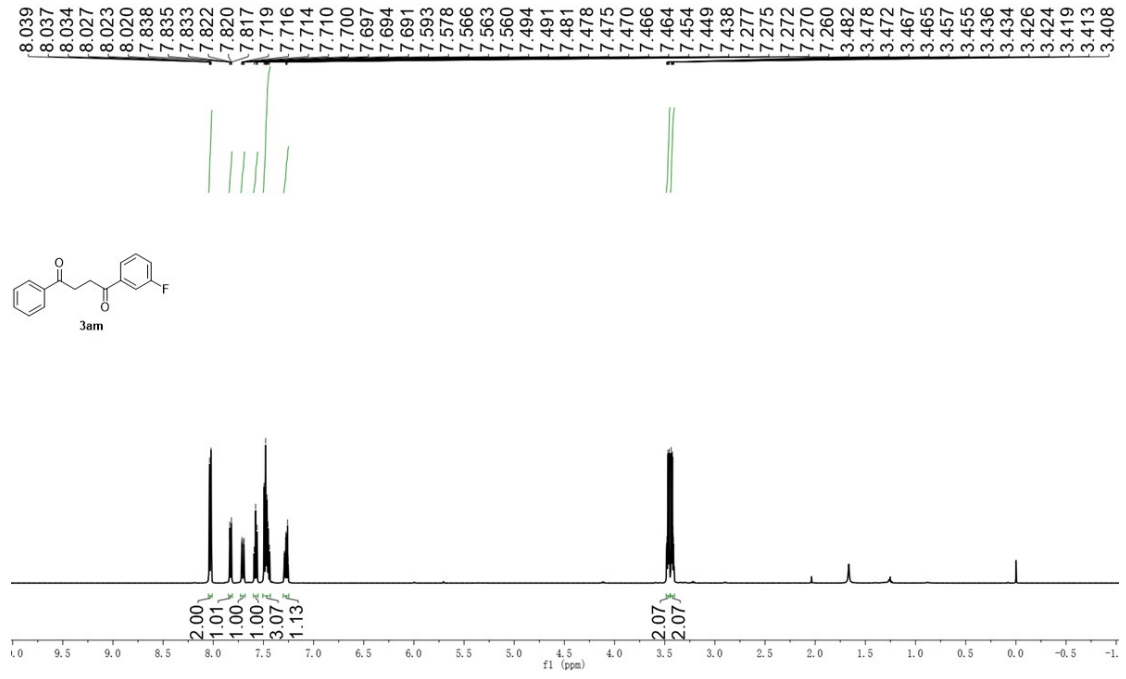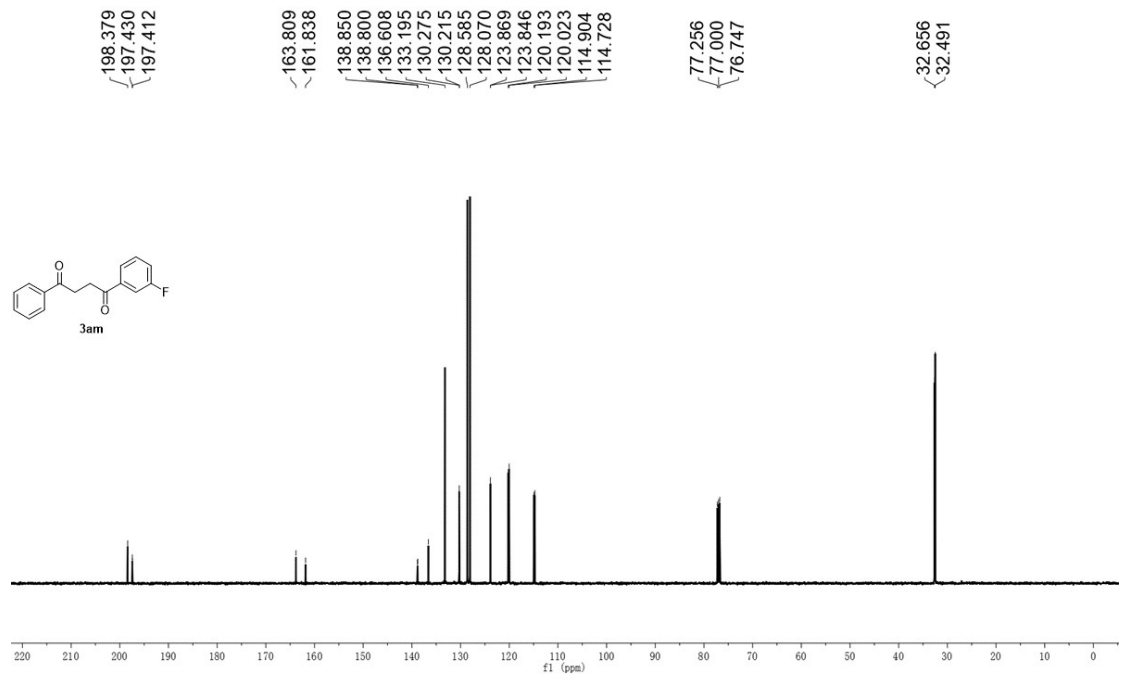

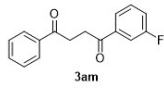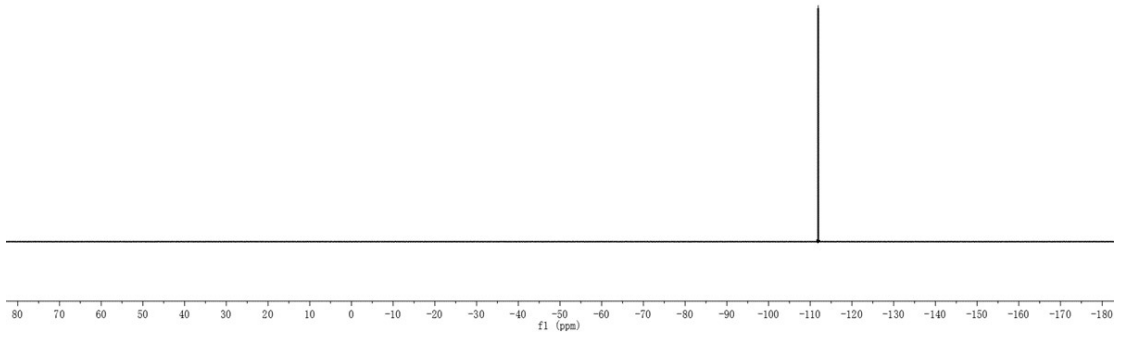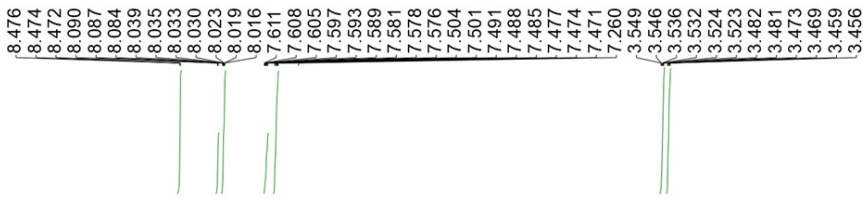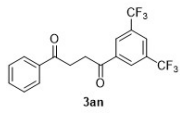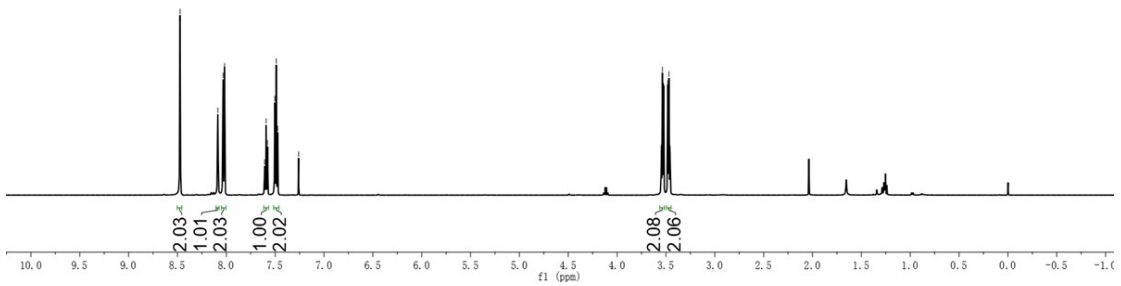

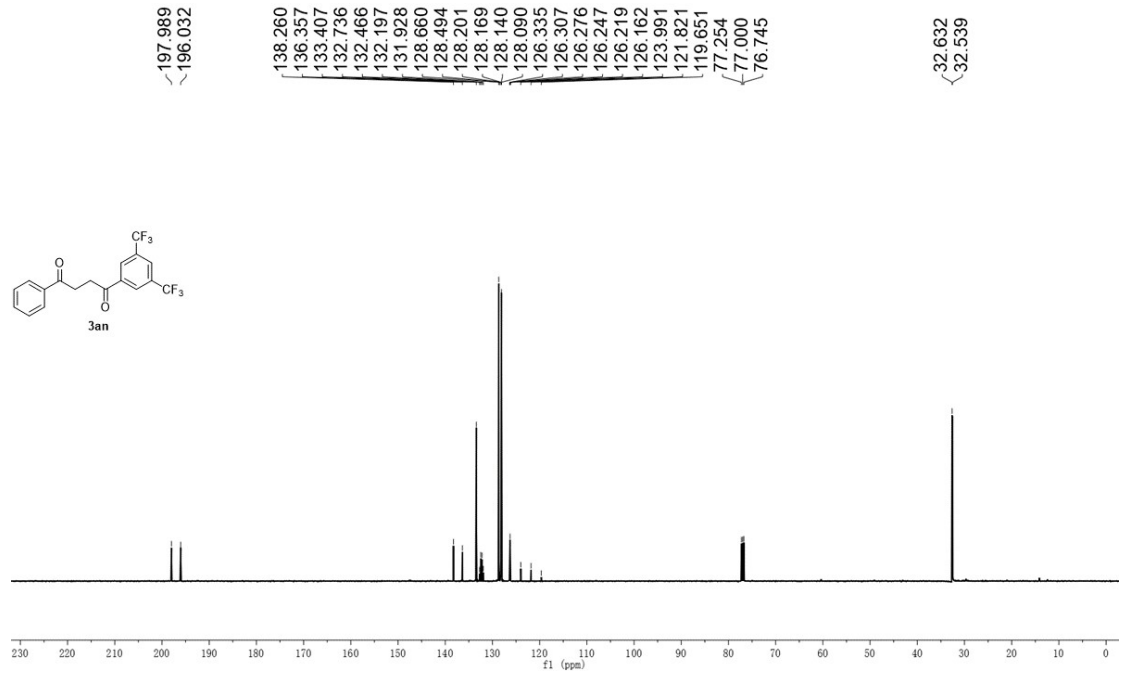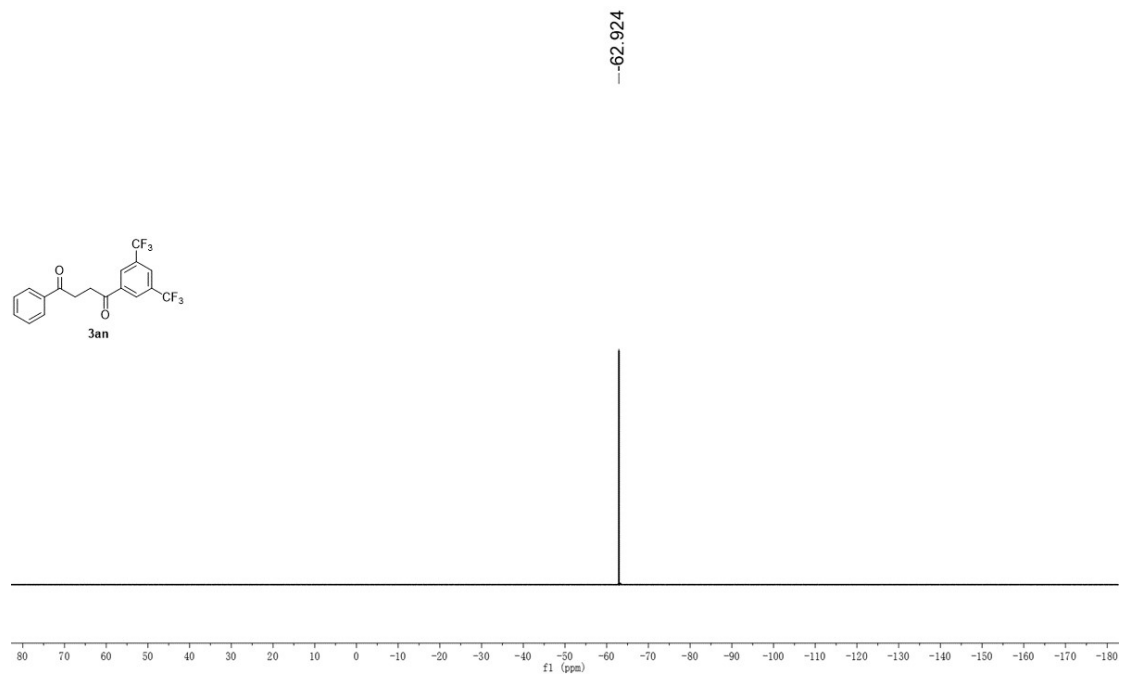

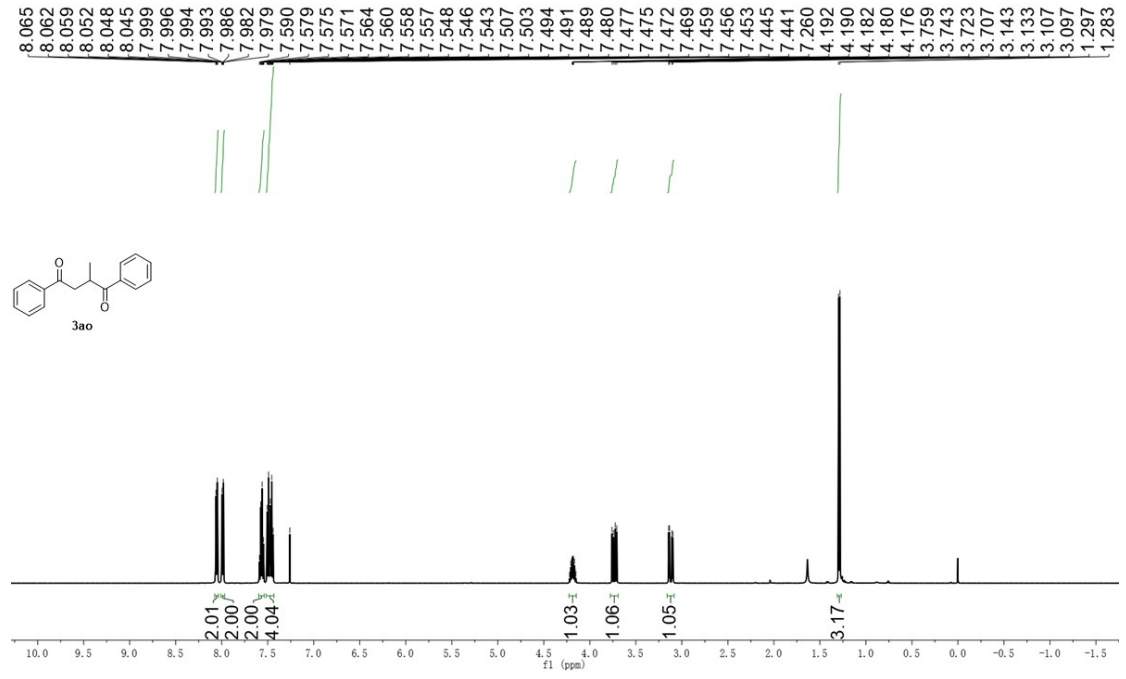

-203.377  
-198.455

136.637  
136.058  
133.158  
132.946  
128.636  
128.543  
128.493  
128.079

77.254  
77.001  
76.747

-42.322  
-36.265

-17.938

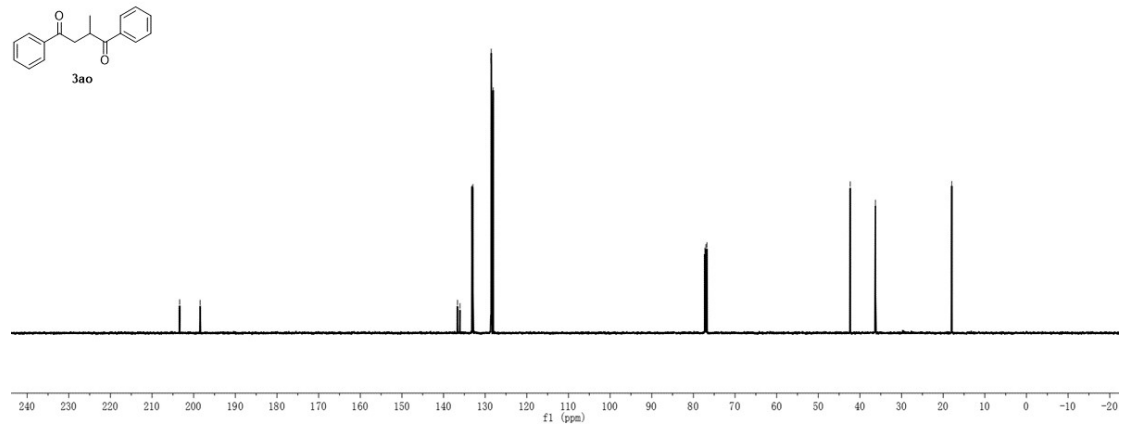

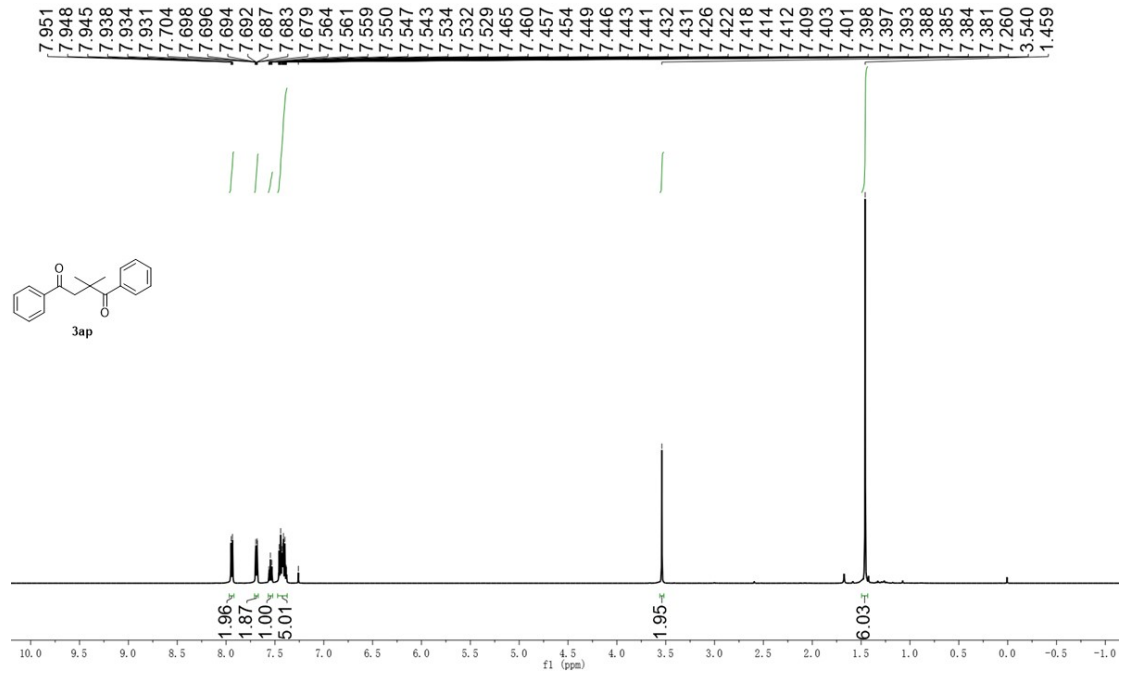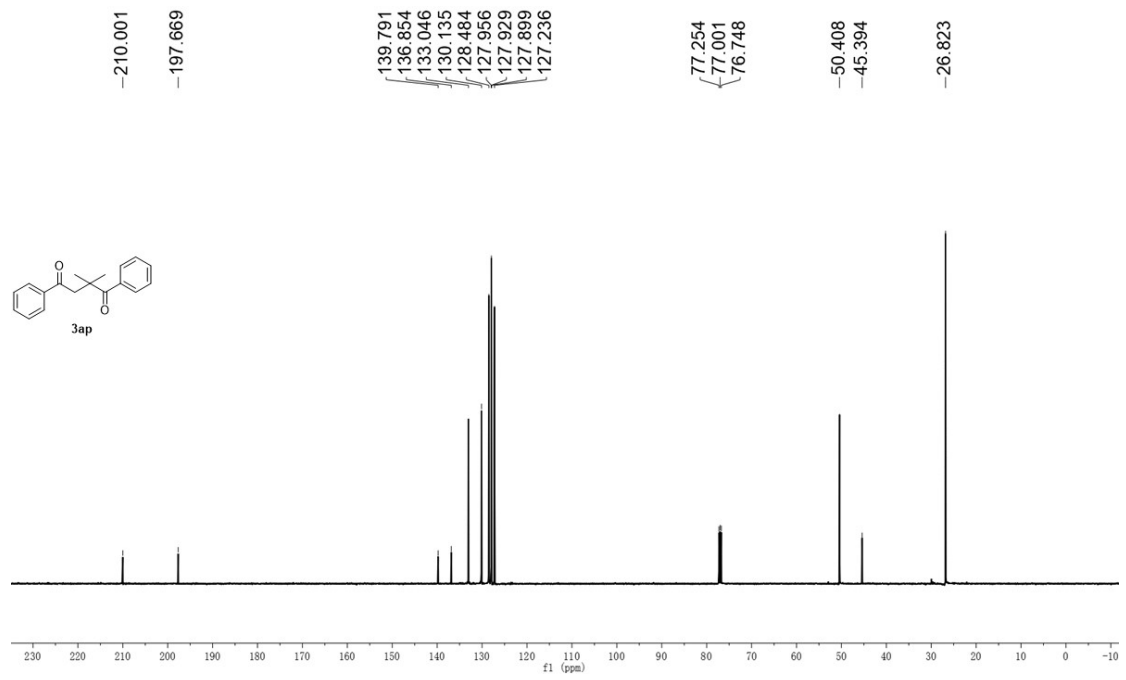

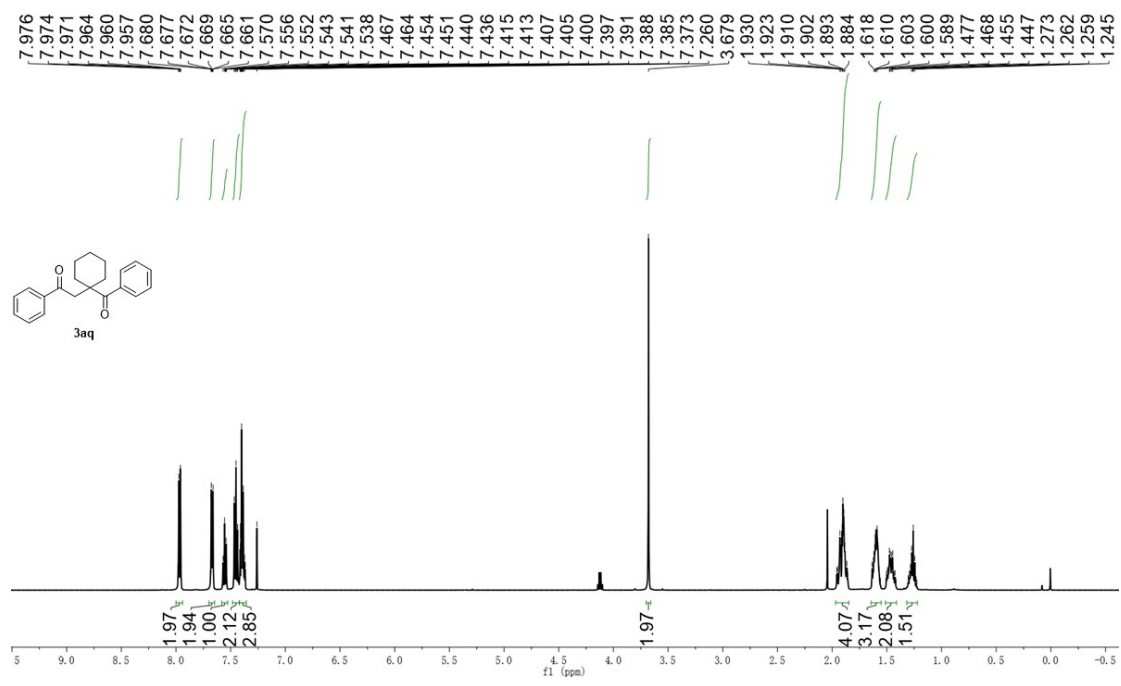

- 211.203
- 198.037
- 140.585
- 137.096
- 133.083
- 129.692
- 128.515
- 127.966
- 127.827
- 127.219
- 77.254
- 77.000
- 76.747
- 49.542
- 43.927
- 33.861
- 25.608
- 22.202

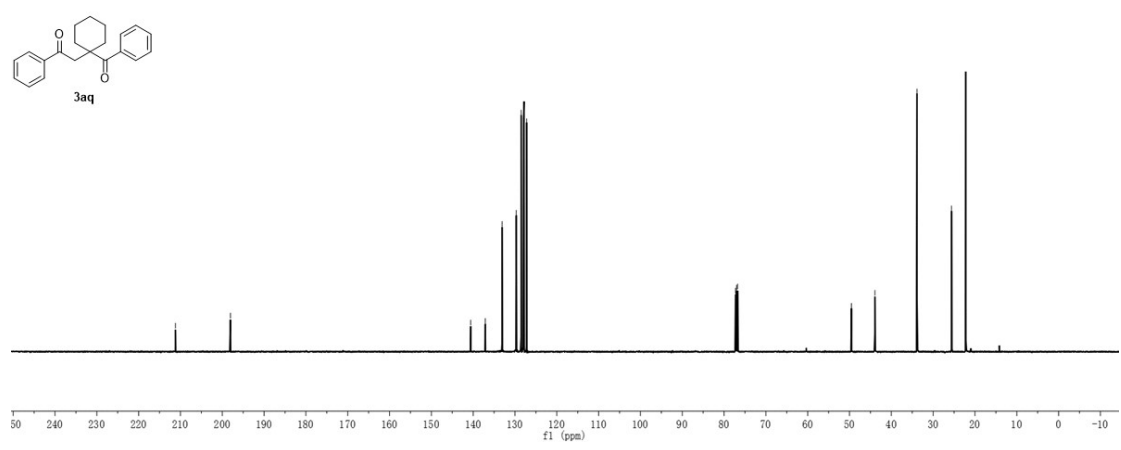



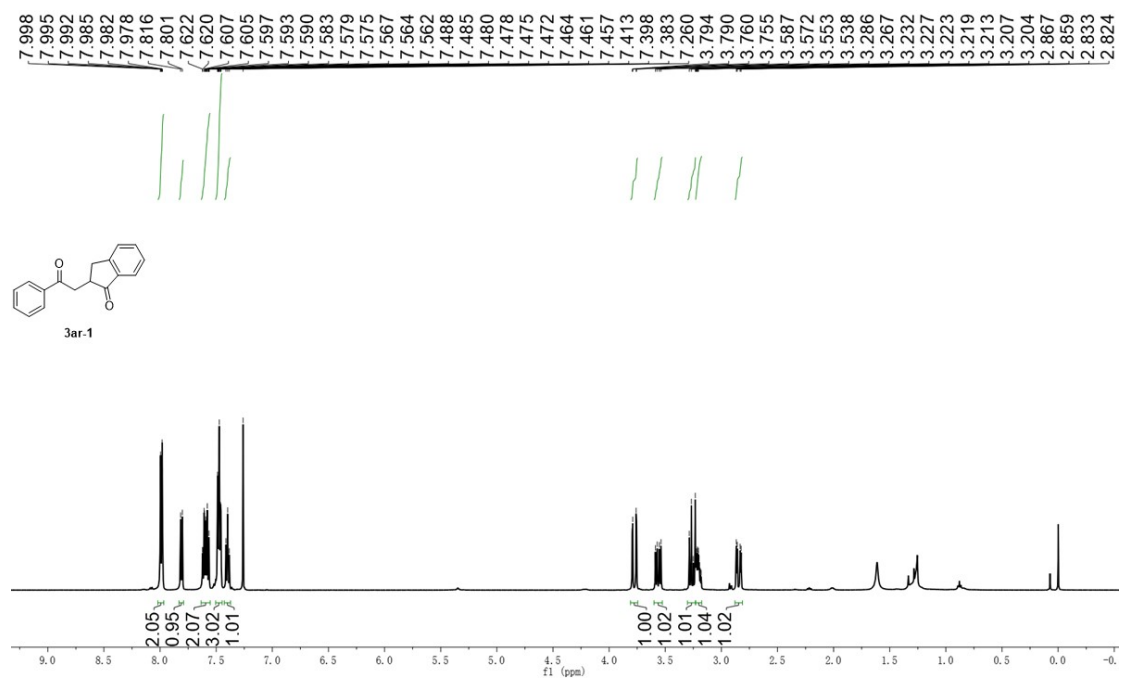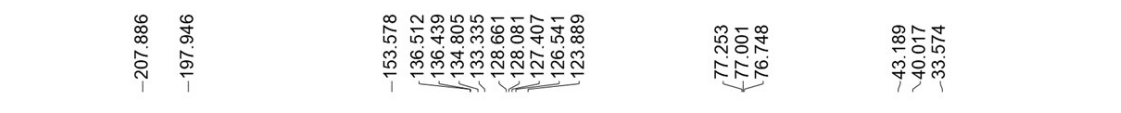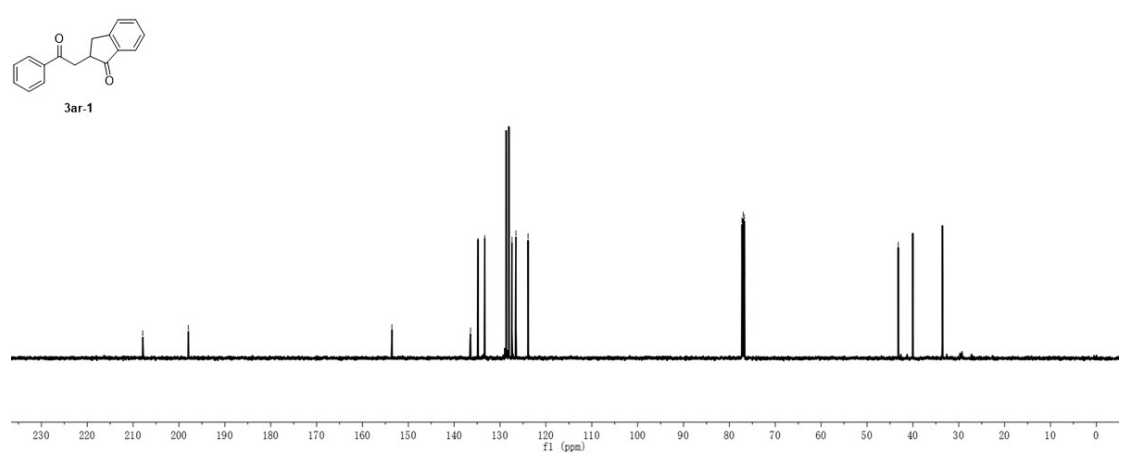

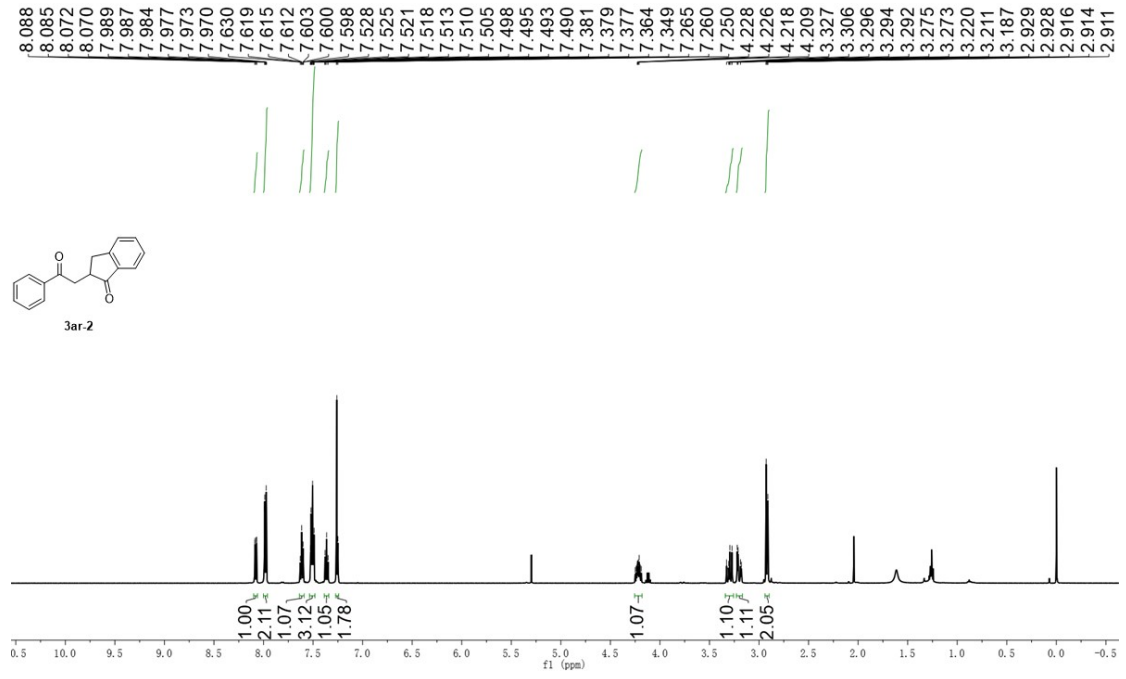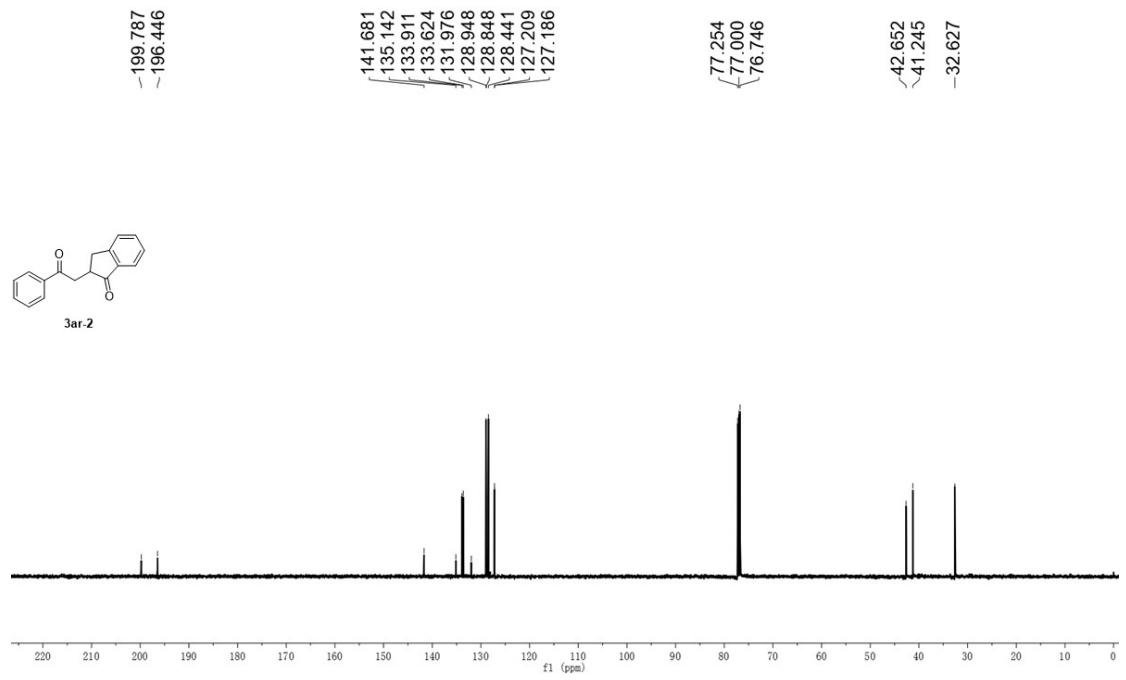

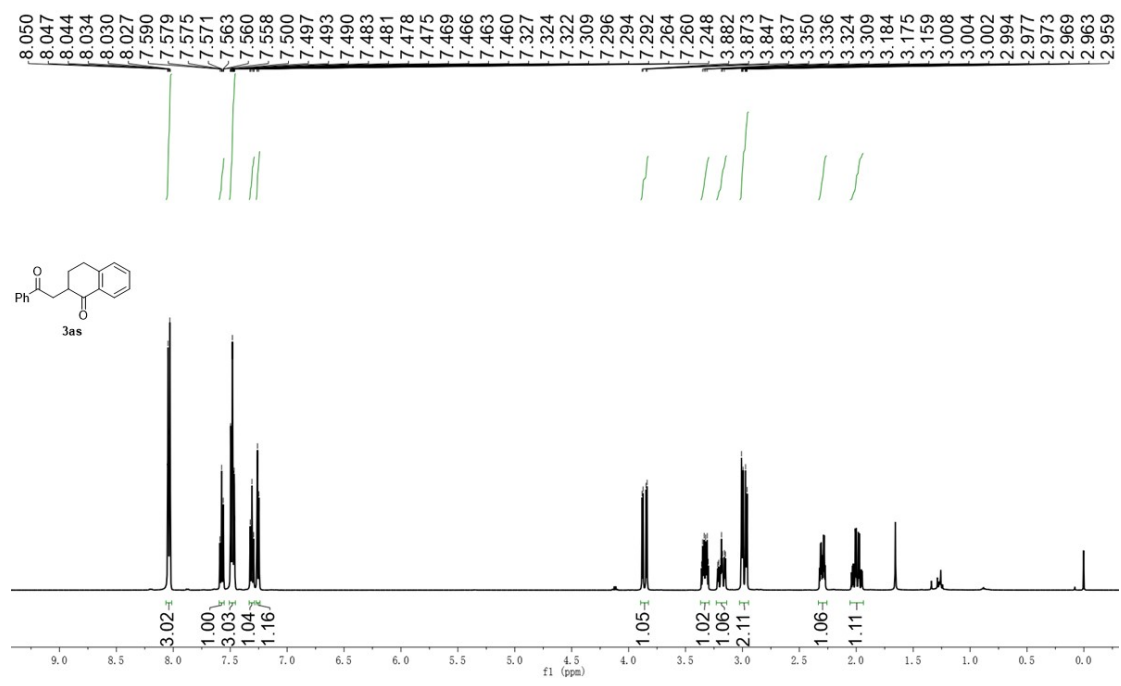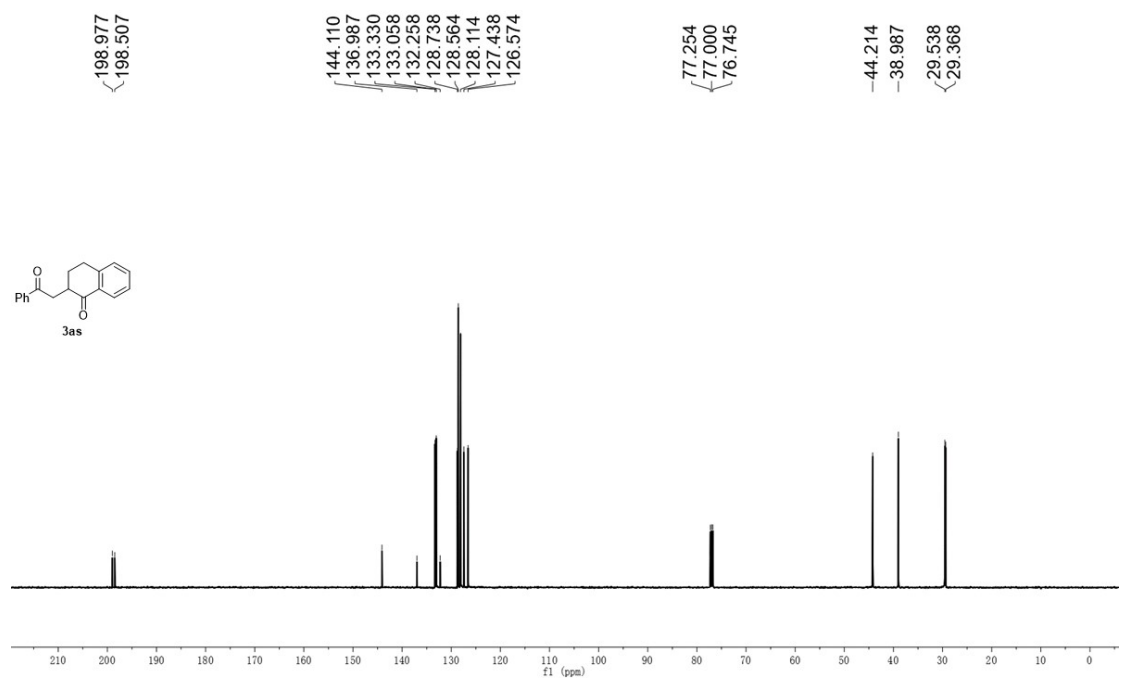

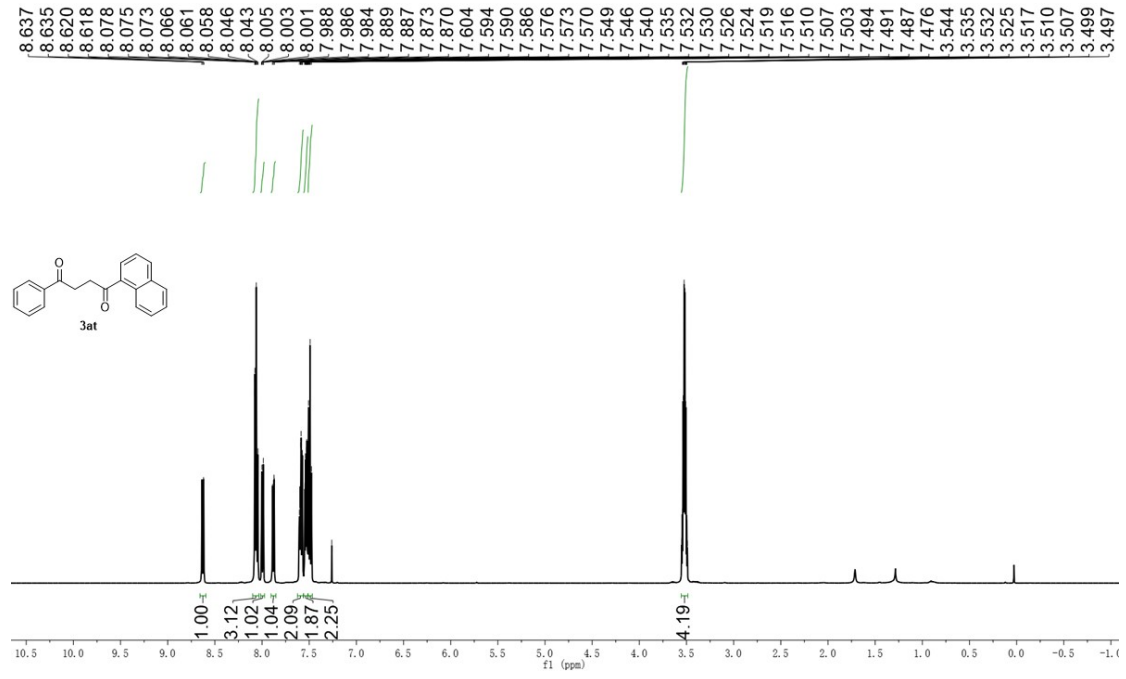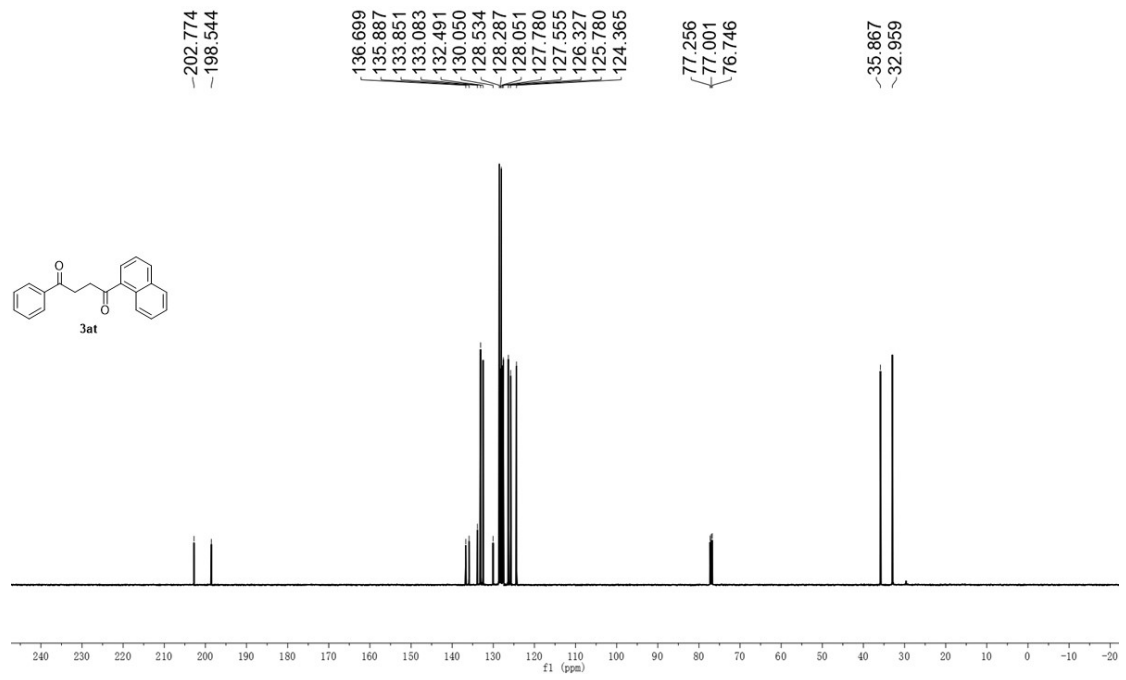

8.039  
8.035  
8.032  
8.029  
8.022  
8.018  
8.015  
7.841  
7.838  
7.833  
7.831  
7.651  
7.649  
7.641  
7.639  
7.593  
7.590  
7.588  
7.579  
7.575  
7.572  
7.563  
7.561  
7.558  
7.495  
7.492  
7.488  
7.479  
7.476  
7.465  
7.461  
7.260  
7.163  
7.155  
7.153  
7.145  
3.477  
3.473  
3.465  
3.461  
3.450  
3.448  
3.419  
3.417  
3.406  
3.402  
3.394  
3.390

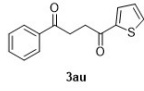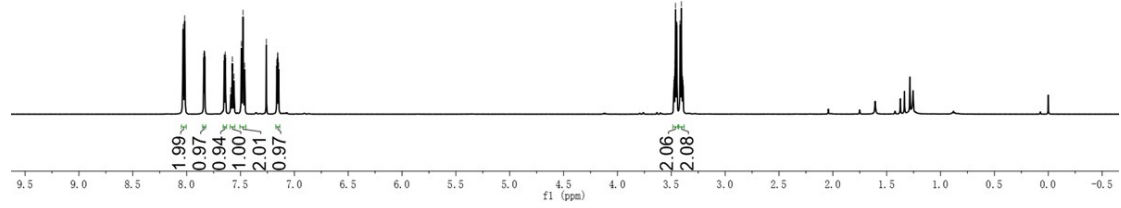

-198.413  
-191.585  
143.869  
136.626  
133.528  
133.180  
132.009  
128.584  
128.094  
77.255  
77.000  
76.746  
33.153  
32.592

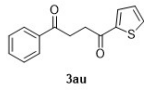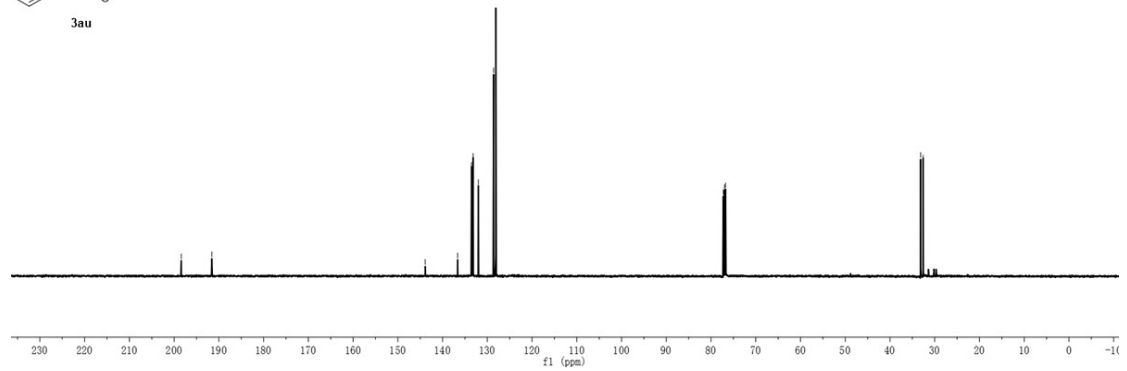

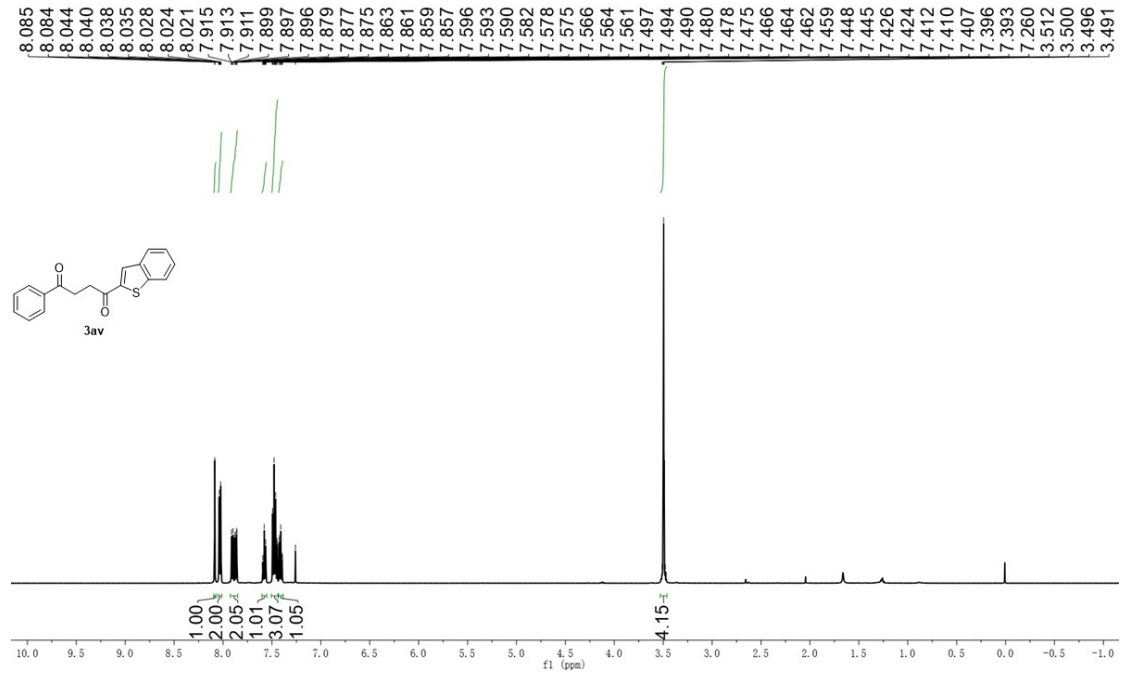

198.250  
193.124

143.213  
142.413  
139.096  
136.549  
133.198  
129.198  
128.576  
128.074  
127.344  
125.933  
124.936  
122.917

77.255  
77.000  
76.746

33.061  
32.624

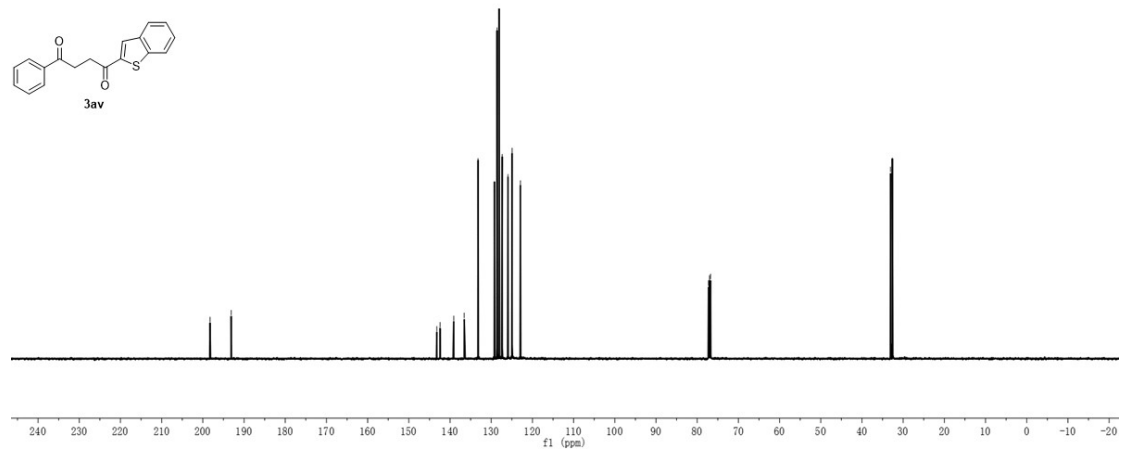

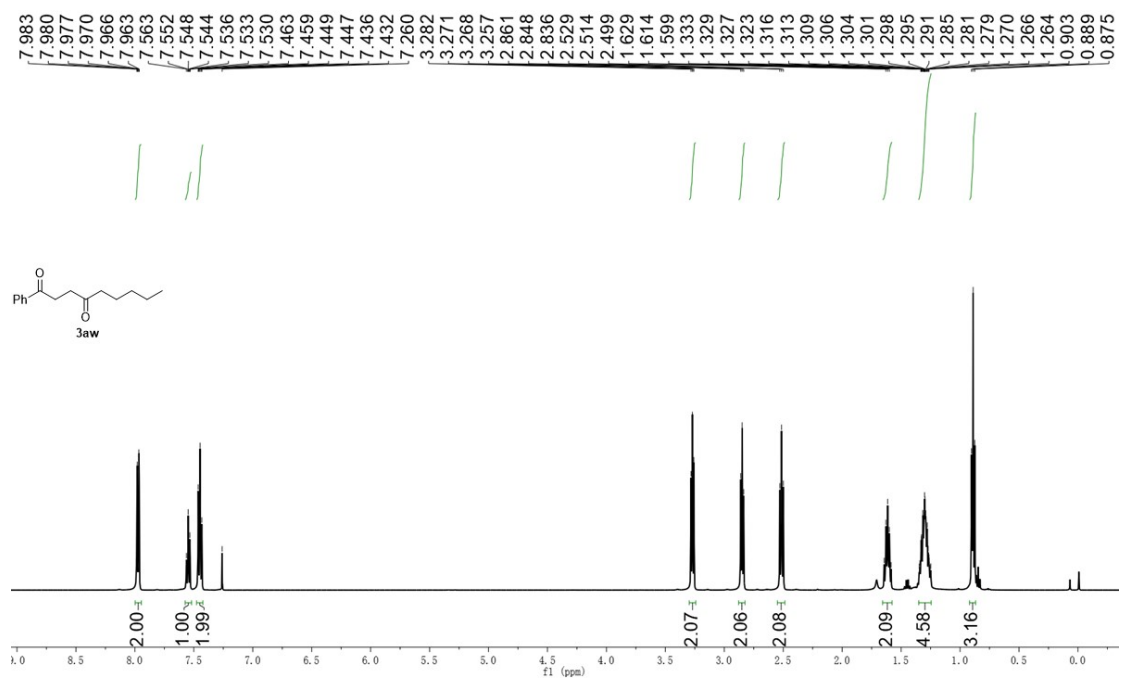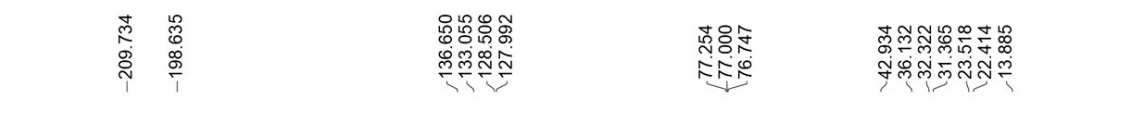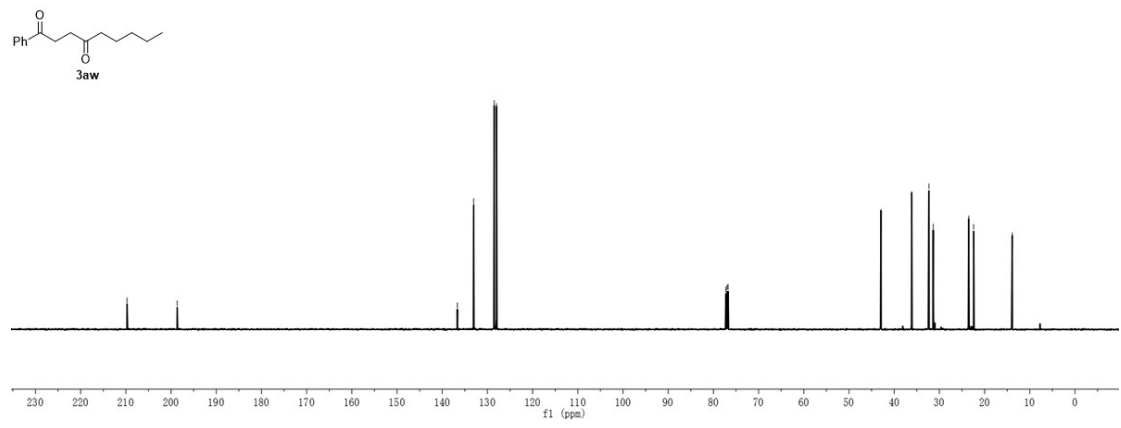

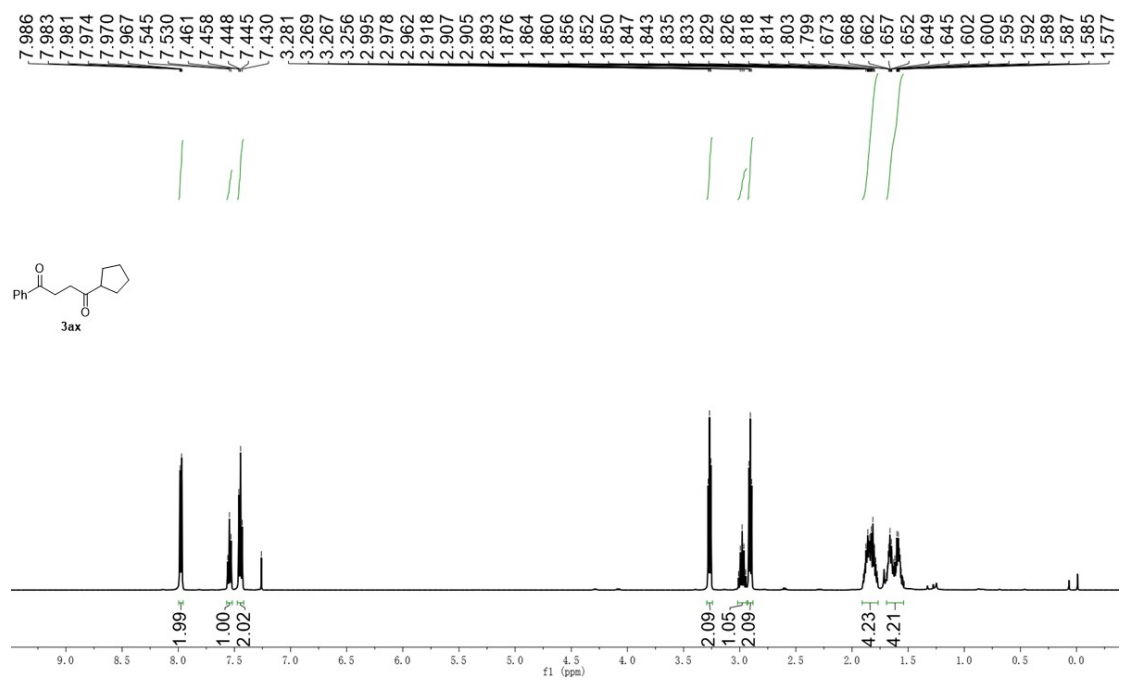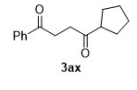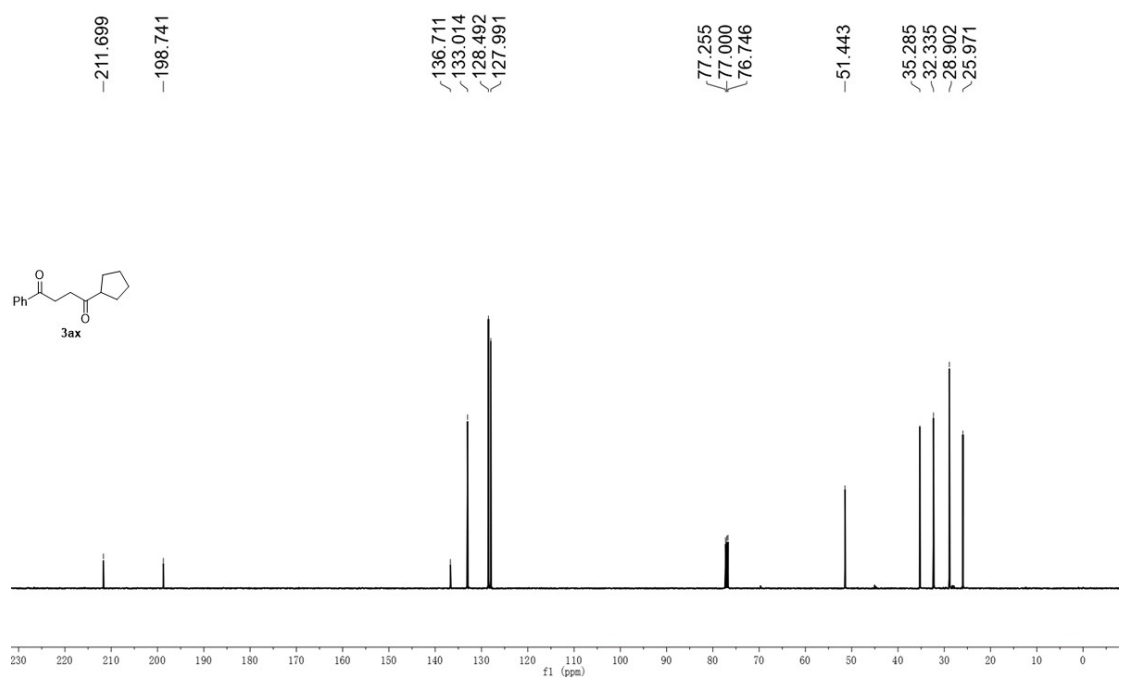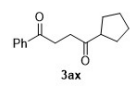



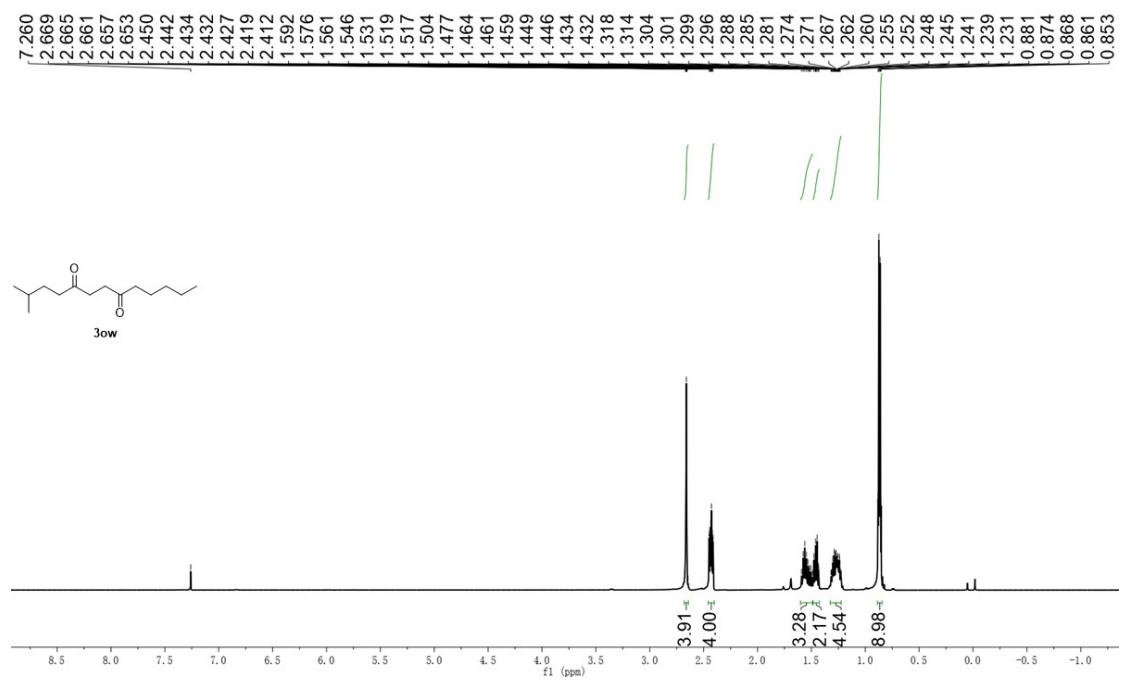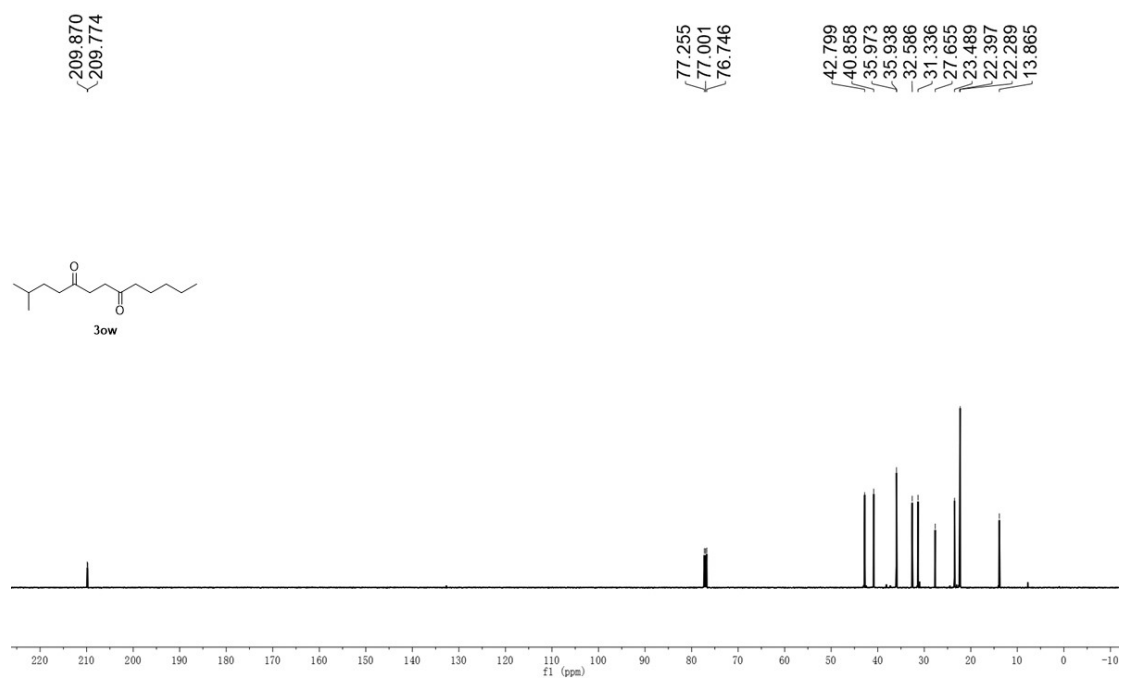

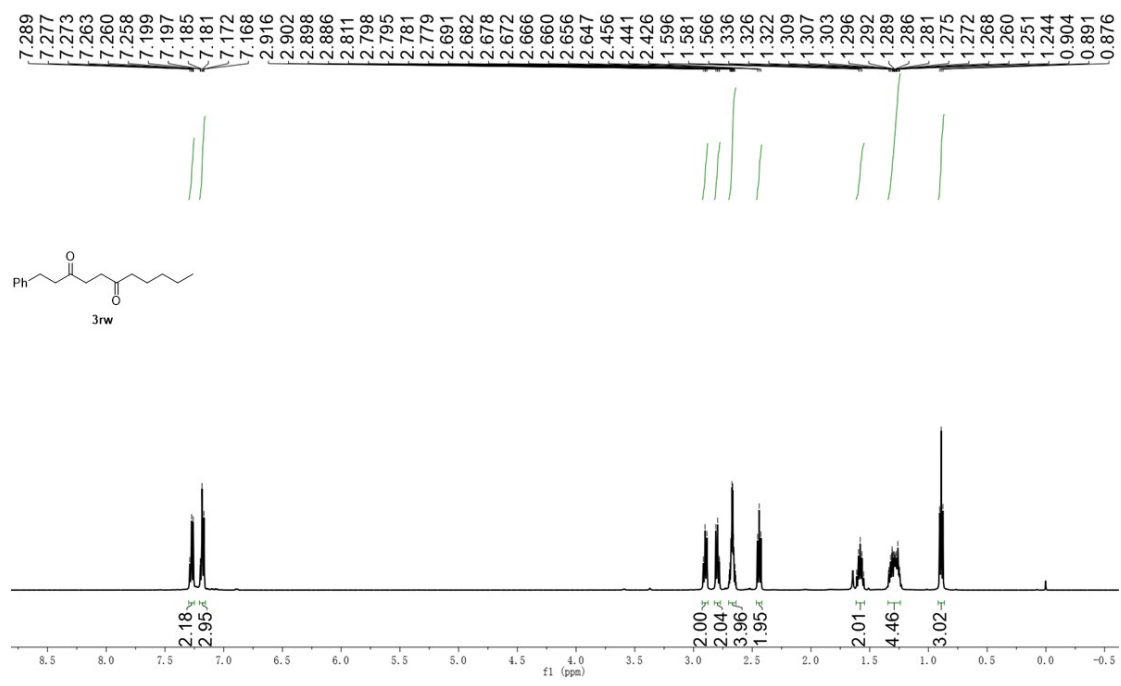

209.682  
208.532

140.983  
128.433  
128.244  
126.034

77.255  
77.001  
76.746

44.282  
42.761  
36.140  
35.971  
31.337  
29.686  
23.493  
22.405  
13.882

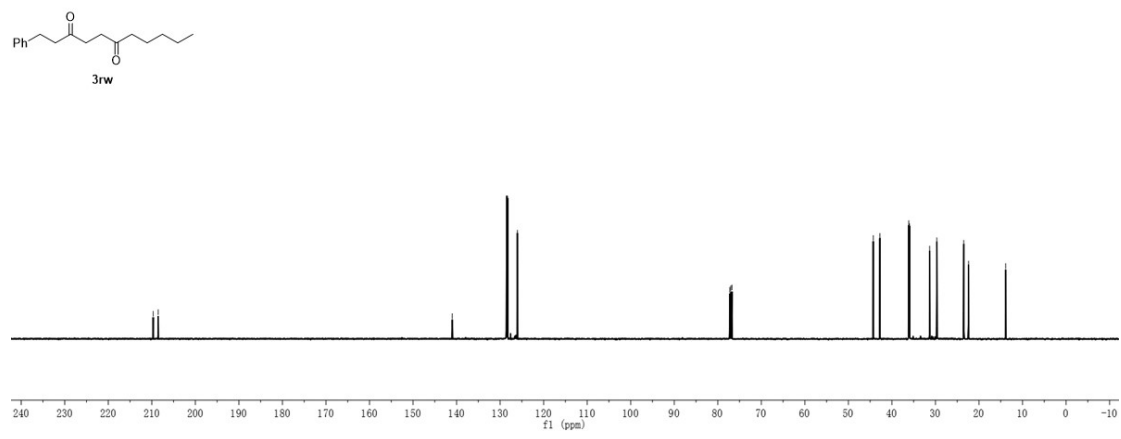

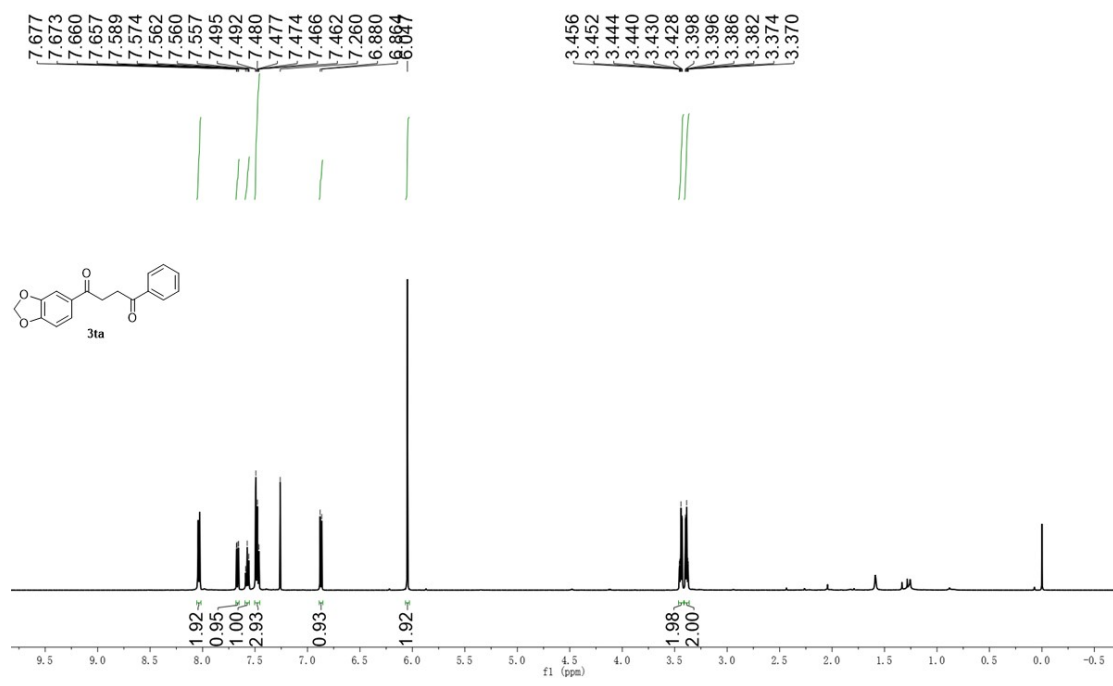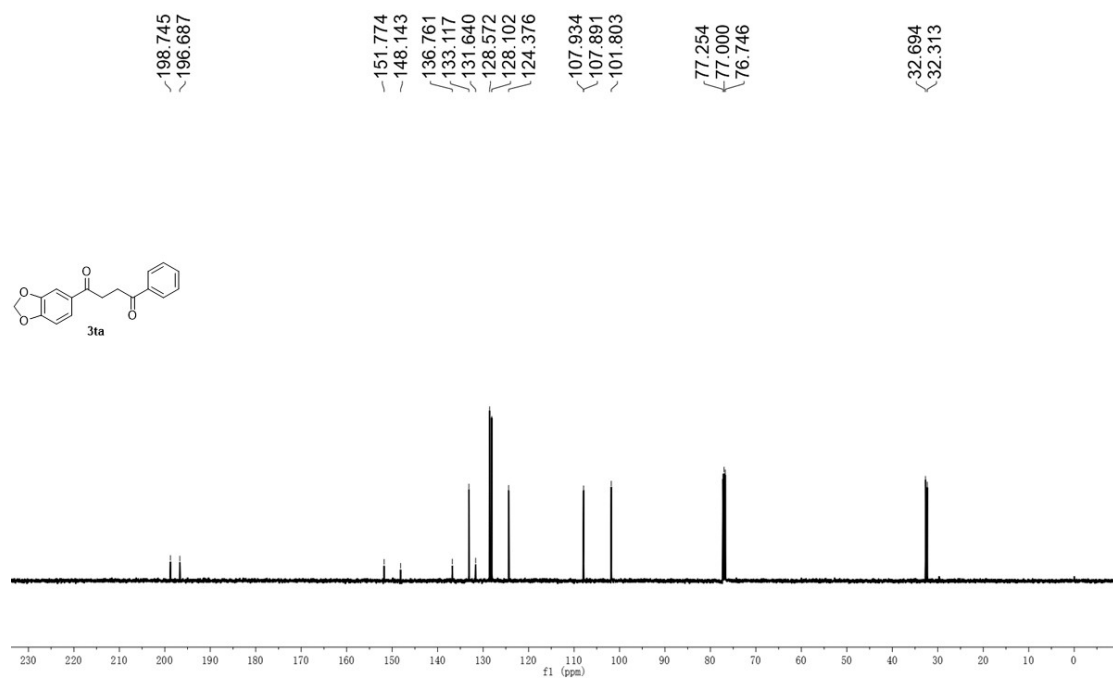

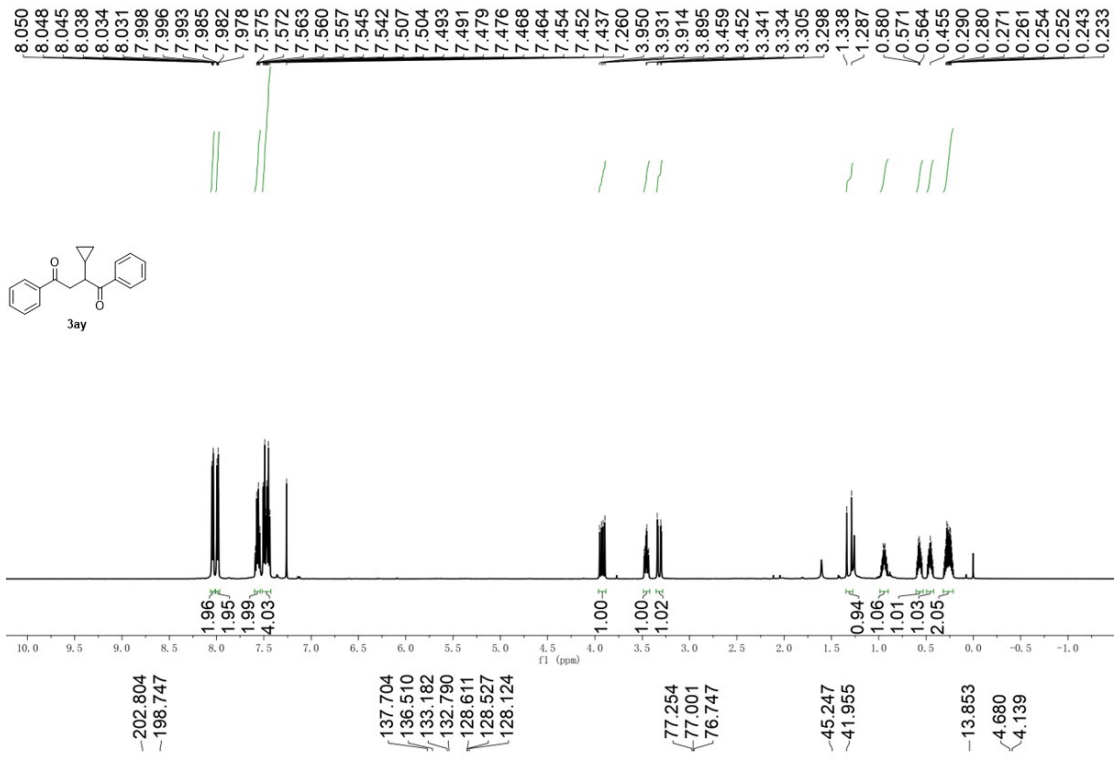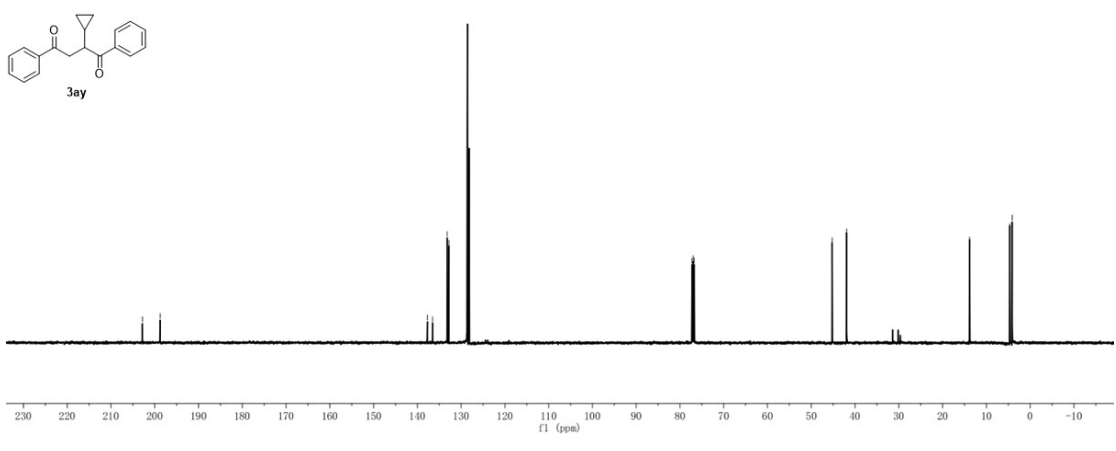

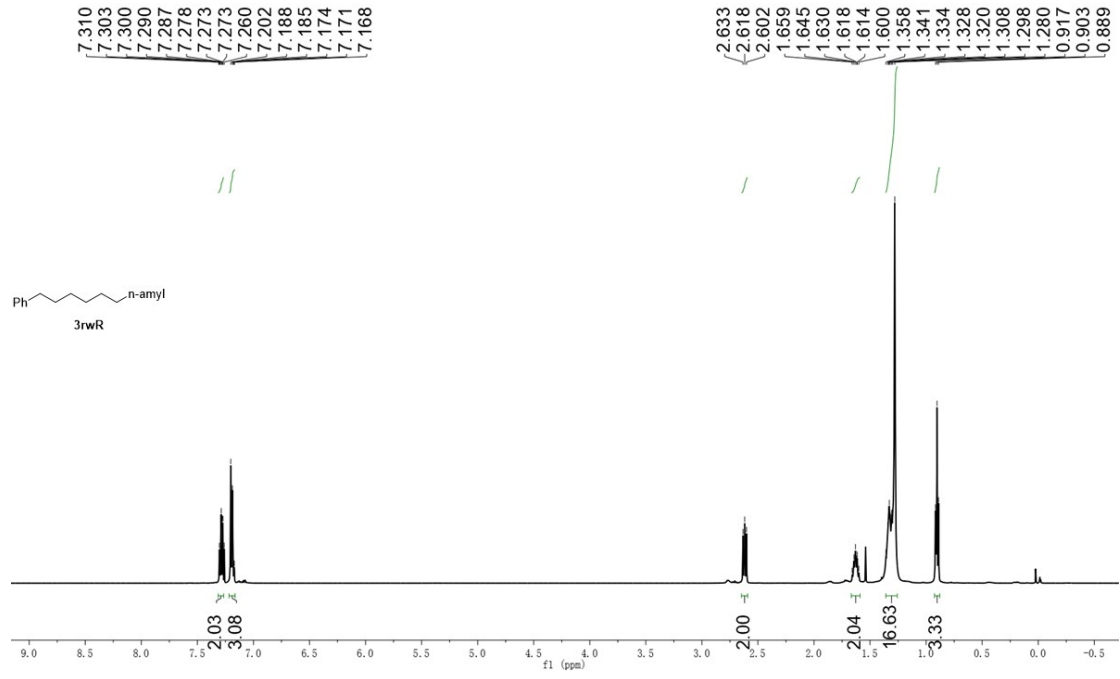

- 142.950
- 128.380, 128.189, 125.514
- 77.254, 77.001, 76.745
- 35.996, 31.921, 31.533, 29.673, 29.636, 29.599, 29.526, 29.350, 22.693
- 14.117

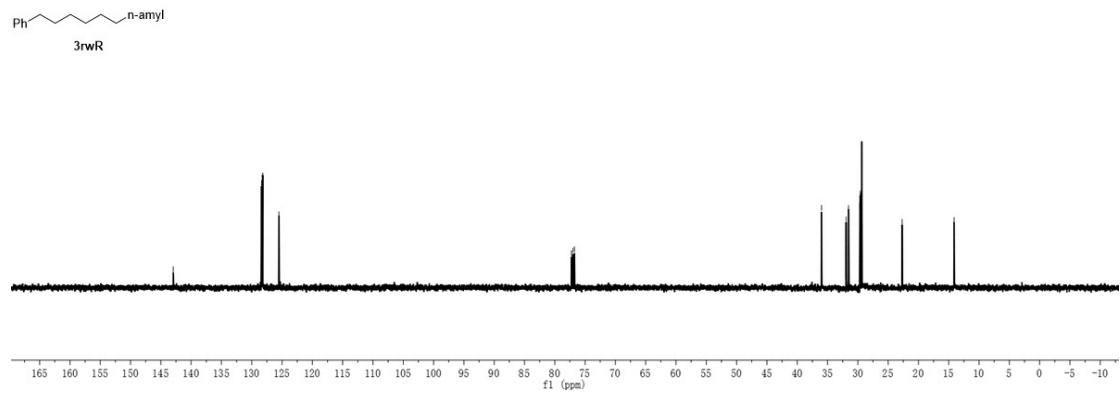

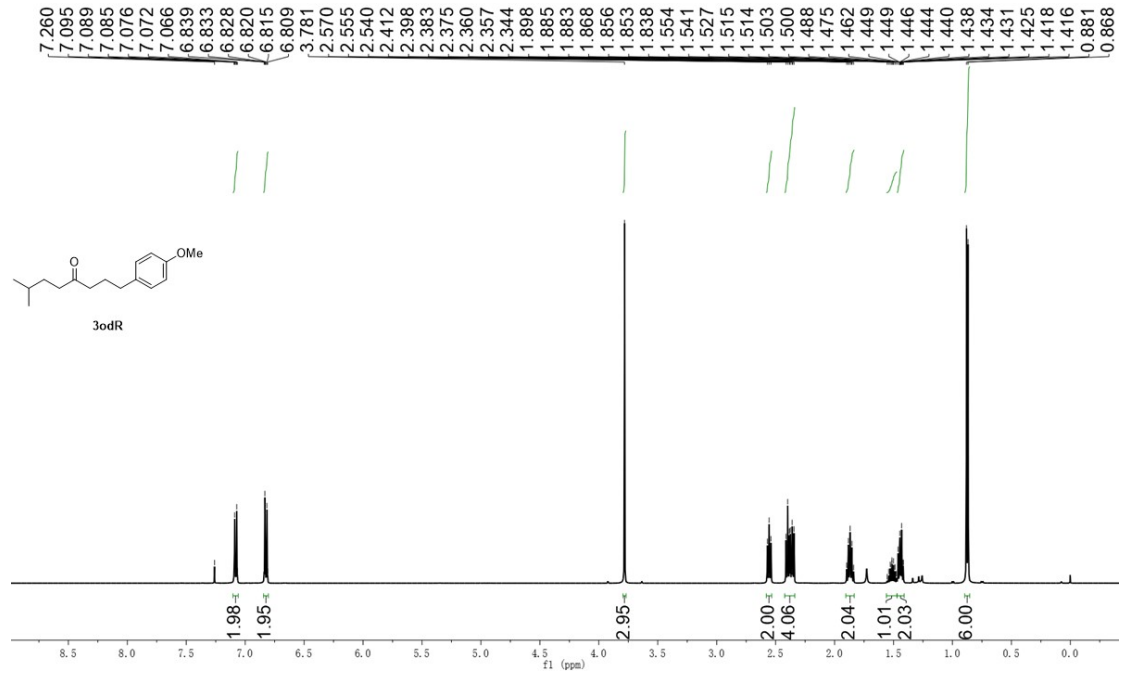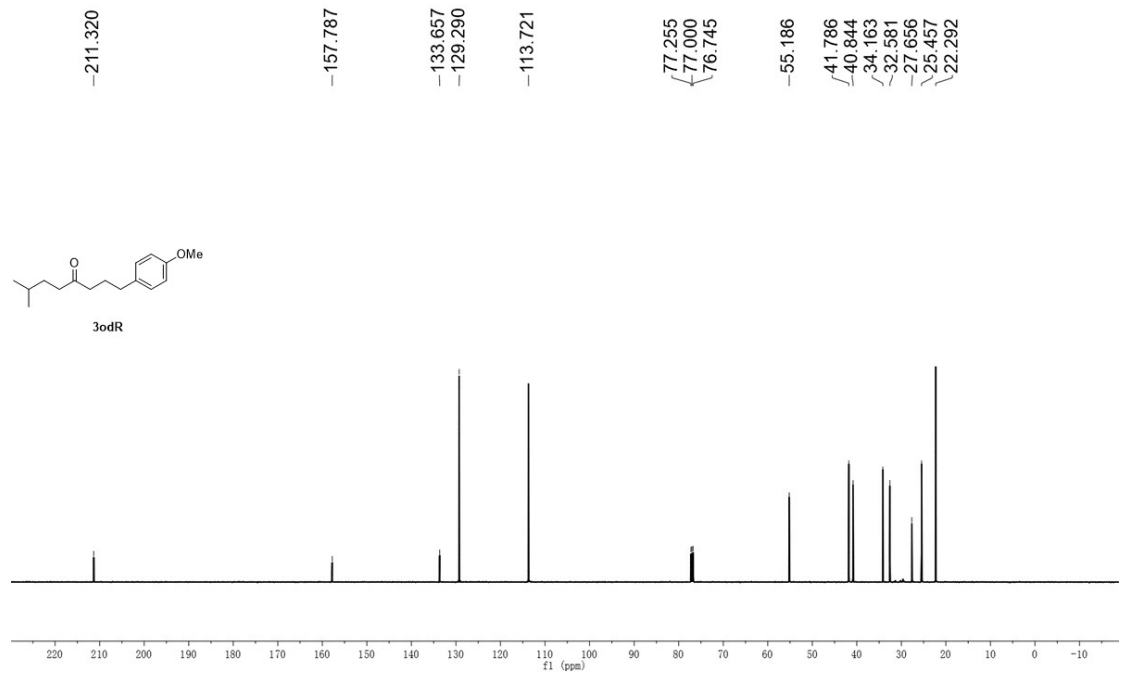

Supplement: d3cc02888g1.pdf [file d3cc02888g1.pdf]
